# Supplementary material for: Testosterone Affects Neural Gene Expression Differently in Male and Female Juncos: A Role for Hormones in Mediating Sexual Dimorphism and Conflict
Source: PubMed Central journal article supplement (PMC3627916; doi:10.1371/journal.pone.0061784), 2013-04-16
Supplement: pone.0061784.s001.pdf [file pone.0061784.s001.pdf]

**Supplementary Table 1. Genes expressed higher in males than females in the medial amygdala.**

| <b>Isogroup</b> | <b>Annotation from nr Database</b>                                                                                     |
|-----------------|------------------------------------------------------------------------------------------------------------------------|
| isogroup00092   | PREDICTED: spectrin, beta, non-erythrocytic 1 [Taeniopygia guttata]                                                    |
| isogroup00224   | PREDICTED: chromosome 9 open reading frame 3 [Taeniopygia guttata]                                                     |
| isogroup00277   | chromo-helicase DNA-binding protein [Zonotrichia albicollis]                                                           |
| isogroup00337   | PREDICTED: hypothetical protein [Gallus gallus]                                                                        |
| isogroup00365   | PREDICTED: similar to DKFZP459P083 protein isoform 1 [Taeniopygia guttata]                                             |
| isogroup00451   | PREDICTED: similar to GRAM domain containing 3 [Taeniopygia guttata]                                                   |
| isogroup00458   | SWI/SNF related, matrix associated, actin dependent regulator of chromatin, subfamily a, member 2 [Gallus gallus]      |
| isogroup00524   | PREDICTED: hypothetical protein [Taeniopygia guttata]                                                                  |
| isogroup00530   | PREDICTED: similar to Uncharacterized protein C9orf85 [Taeniopygia guttata]                                            |
| isogroup00533   | DNA-directed DNA polymerase kappa [Gallus gallus]                                                                      |
| isogroup00551   | RPTOR independent companion of MTOR, complex 2 [Bos taurus]                                                            |
| isogroup00570   | single-stranded DNA binding protein 2 [Homo sapiens]                                                                   |
| isogroup00574   | PREDICTED: similar to semaphorin 5A [Taeniopygia guttata]                                                              |
| isogroup00606   | NA                                                                                                                     |
| isogroup00694   | PREDICTED: prolactin receptor [Taeniopygia guttata]                                                                    |
| isogroup00744   | PREDICTED: xeroderma pigmentosum, complementation group A [Taeniopygia guttata]                                        |
| isogroup00779   | PREDICTED: SMC5 protein [Taeniopygia guttata]                                                                          |
| isogroup00783   | PREDICTED: death-associated protein kinase 1 [Taeniopygia guttata]                                                     |
| isogroup00794   | PREDICTED: similar to Lipid phosphate phosphohydrolase 1 [Taeniopygia guttata]                                         |
| isogroup00897   | COP9 constitutive photomorphogenic homolog subunit 6 [Xenopus laevis]                                                  |
| isogroup00941   | PREDICTED: similar to plasma membrane calcium ATPase 2 isoform 2 [Gallus gallus]                                       |
| isogroup00984   | PREDICTED: similar to KIAA0372 [Gallus gallus]                                                                         |
| isogroup00991   | PREDICTED: jumonji domain containing 2C [Taeniopygia guttata]                                                          |
| isogroup00999   | PREDICTED: COBW domain containing protein1 [Taeniopygia guttata]                                                       |
| isogroup01029   | PREDICTED: alpha2,3-sialyltransferase VI isoform 1 [Taeniopygia guttata]                                               |
| isogroup01050   | PREDICTED: zinc finger, CCHC domain containing 6 [Taeniopygia guttata]                                                 |
| isogroup01057   | PREDICTED: similar to 1-phosphatidylinositol-4,5-bisphosphate phosphodiesterase beta-4 isoform 1 [Taeniopygia guttata] |
| isogroup01062   | syntaxin 6 [Gallus gallus]                                                                                             |
| isogroup01070   | NA                                                                                                                     |
| isogroup01106   | PREDICTED: similar to SHC (Src homology 2 domain containing) transforming protein 3 [Taeniopygia guttata]              |
| isogroup01149   | macrophage receptor with collagenous structure [Gallus gallus]                                                         |
| isogroup01181   | PREDICTED: similar to phosphoinositide-3-kinase, class 3 [Taeniopygia guttata]                                         |

| <b>Isogroup</b> | <b>Annotation from nr Database</b>                                                                                  |
|-----------------|---------------------------------------------------------------------------------------------------------------------|
| isogroup01284   | PREDICTED: RAS p21 protein activator (GTPase activating protein) 1 [Taeniopygia guttata]                            |
| isogroup01320   | PREDICTED: similar to SMC1 structural maintenance of chromosomes 1-like 1 isoform 2 [Macaca mulatta]                |
| isogroup01374   | NA                                                                                                                  |
| isogroup01390   | NA                                                                                                                  |
| isogroup01394   | PREDICTED: similar to KIAA1066 protein [Gallus gallus]                                                              |
| isogroup01405   | PREDICTED: G patch domain containing 8 [Taeniopygia guttata]                                                        |
| isogroup01427   | PREDICTED: microtubule-associated protein 1B isoform 1 [Taeniopygia guttata]                                        |
| isogroup01461   | PREDICTED: lysosomal trafficking regulator [Taeniopygia guttata]                                                    |
| isogroup01466   | PREDICTED: similar to protein geranylgeranyltransferase type I, beta subunit isoform 1 [Equus caballus]             |
| isogroup01658   | Rpl17 protein [Mus musculus]                                                                                        |
| isogroup01772   | perilipin 1 [Gallus gallus]                                                                                         |
| isogroup01805   | SOSS complex subunit C [Gallus gallus]                                                                              |
| isogroup01811   | PREDICTED: survival of motor neuron [Taeniopygia guttata]                                                           |
| isogroup01868   | PREDICTED: ankyrin repeat domain protein 15 [Gallus gallus]                                                         |
| isogroup01902   | PREDICTED: NADH dehydrogenase (ubiquinone) Fe-S protein 4 [Taeniopygia guttata]                                     |
| isogroup01948   | PREDICTED: ST8 alpha-N-acetyl-neuraminide alpha-2,8-sialyltransferase 5 [Taeniopygia guttata]                       |
| isogroup02203   | PREDICTED: transmembrane protein 161B [Taeniopygia guttata]                                                         |
| isogroup02212   | PREDICTED: ubiquitin specific protease 4 [Taeniopygia guttata]                                                      |
| isogroup02238   | PREDICTED: similar to putative peptidylprolyl isomerase C [Taeniopygia guttata]                                     |
| isogroup02286   | NA                                                                                                                  |
| isogroup02410   | Coiled-coil domain containing 101 [Mus musculus]                                                                    |
| isogroup02530   | PREDICTED: ankyrin repeat domain 32 [Taeniopygia guttata]                                                           |
| isogroup02549   | NA                                                                                                                  |
| isogroup02560   | unnamed protein product [Homo sapiens]                                                                              |
| isogroup02714   | PREDICTED: similar to LOC100170471 protein [Taeniopygia guttata]                                                    |
| isogroup02725   | neurexin 3 beta precursor [Gallus gallus]                                                                           |
| isogroup02754   | PREDICTED: v-abl Abelson murine leukemia viral oncogene homolog 2 (arg, Abelson-related gene) [Taeniopygia guttata] |
| isogroup02775   | PREDICTED: similar to synaptic vesicle glycoprotein 2b [Taeniopygia guttata]                                        |
| isogroup02806   | NA                                                                                                                  |
| isogroup02941   | PREDICTED: similar to mesoderm induction early response 1, family member 2 [Taeniopygia guttata]                    |
| isogroup02948   | PREDICTED: hypothetical protein [Taeniopygia guttata]                                                               |

| <b>Isogroup</b> | <b>Annotation from nr Database</b>                                                                                                     |
|-----------------|----------------------------------------------------------------------------------------------------------------------------------------|
| isogroup02951   | PREDICTED: similar to RAD26L hypothetical protein [Equus caballus]                                                                     |
| isogroup02999   | PREDICTED: solute carrier family 44, member 2, partial [Taeniopygia guttata]                                                           |
| isogroup03045   | PREDICTED: similar to zinc finger protein 423 [Gallus gallus]                                                                          |
| isogroup03074   | PREDICTED: multiple PDZ domain protein [Taeniopygia guttata]                                                                           |
| isogroup03097   | PREDICTED: phosphatidylinositol-4-phosphate 5-kinase, type I, beta [Taeniopygia guttata]                                               |
| isogroup03129   | PREDICTED: ring finger protein 20 [Taeniopygia guttata]                                                                                |
| isogroup03176   | PREDICTED: similar to polyadenylate binding protein-interacting protein 1 [Taeniopygia guttata]                                        |
| isogroup03256   | PREDICTED: similar to KIF27A [Monodelphis domestica]                                                                                   |
| isogroup03336   | PREDICTED: PC4 and SFRS1 interacting protein 1 [Taeniopygia guttata]                                                                   |
| isogroup03347   | AF211859_1 cyclin ania-6b [Mus musculus]                                                                                               |
| isogroup03383   | PREDICTED: similar to UBQLN1 protein [Gallus gallus]                                                                                   |
| isogroup03391   | NA                                                                                                                                     |
| isogroup03406   | PREDICTED: similar to ELAV (embryonic lethal, abnormal vision, Drosophila)-like 2 (Hu antigen B) (AKA Mel-N1), partial [Gallus gallus] |
| isogroup03418   | NA                                                                                                                                     |
| isogroup03443   | PREDICTED: similar to protein-L-isoaspartate (D-aspartate) O-methyltransferase domain containing 2 [Ornithorhynchus anatinus]          |
| isogroup03489   | PREDICTED: similar to myosin IXA [Taeniopygia guttata]                                                                                 |
| isogroup03572   | PREDICTED: arrestin domain containing 3 [Taeniopygia guttata]                                                                          |
| isogroup03582   | PREDICTED: etoposide induced 2.4 mRNA [Taeniopygia guttata]                                                                            |
| isogroup03596   | PREDICTED: adenomatous polyposis coli [Taeniopygia guttata]                                                                            |
| isogroup03607   | PREDICTED: zinc finger protein 533 [Taeniopygia guttata]                                                                               |
| isogroup03644   | PREDICTED: similar to KIAA0833 protein [Rattus norvegicus]                                                                             |
| isogroup03651   | PREDICTED: hypothetical protein [Gallus gallus]                                                                                        |
| isogroup03694   | PREDICTED: similar to MEK kinase 1 [Gallus gallus]                                                                                     |
| isogroup03703   | NA                                                                                                                                     |
| isogroup03724   | PREDICTED: family with sequence similarity 102, member A [Taeniopygia guttata]                                                         |
| isogroup03789   | PREDICTED: hypothetical protein [Taeniopygia guttata]                                                                                  |
| isogroup03812   | NA                                                                                                                                     |
| isogroup03930   | PREDICTED: prion protein interacting protein [Taeniopygia guttata]                                                                     |
| isogroup03949   | PREDICTED: similar to Mahogunin, ring finger 1 [Gallus gallus]                                                                         |
| isogroup03958   | SWI/SNF related, matrix associated, actin dependent regulator of chromatin, subfamily a, member 2 [Gallus gallus]                      |
| isogroup03976   | PREDICTED: similar to inositol 1,4,5-trisphosphate 3-kinase B [Taeniopygia guttata]                                                    |
| isogroup04049   | PREDICTED: similar to semaphorin SEMA6A1 [Gallus gallus]                                                                               |

| <b>Isogroup</b> | <b>Annotation from nr Database</b>                                                                  |
|-----------------|-----------------------------------------------------------------------------------------------------|
| isogroup04163   | PREDICTED: acetyl-coenzyme A acyltransferase 2 [Taeniopygia guttata]                                |
| isogroup04199   | PREDICTED: putative clathrin light polypeptide variant 1a [Taeniopygia guttata]                     |
| isogroup04207   | NA                                                                                                  |
| isogroup04217   | PREDICTED: similar to P450 (cytochrome) oxidoreductase [Taeniopygia guttata]                        |
| isogroup04227   | PREDICTED: similar to DnaJ (Hsp40) homolog, subfamily B, member 5 [Taeniopygia guttata]             |
| isogroup04250   | PREDICTED: putative sorting nexin 24 [Taeniopygia guttata]                                          |
| isogroup04483   | PREDICTED: hypothetical protein [Taeniopygia guttata]                                               |
| isogroup04504   | NA                                                                                                  |
| isogroup04531   | NA                                                                                                  |
| isogroup04581   | NA                                                                                                  |
| isogroup04720   | PREDICTED: non-imprinted in Prader-Willi/Angelman syndrome 1 [Taeniopygia guttata]                  |
| isogroup04723   | PREDICTED: WD repeat domain 70 [Taeniopygia guttata]                                                |
| isogroup04781   | NA                                                                                                  |
| isogroup04828   | PREDICTED: cholinergic receptor, nicotinic, beta polypeptide 3 [Taeniopygia guttata]                |
| isogroup04836   | PREDICTED: similar to transcription factor 20 [Gallus gallus]                                       |
| isogroup04877   | hypothetical protein PANDA_011833 [Ailuropoda melanoleuca]                                          |
| isogroup04886   | NA                                                                                                  |
| isogroup04905   | PREDICTED: similar to Chromosome 14 open reading frame 166B, partial [Ornithorhynchus anatinus]     |
| isogroup04966   | PREDICTED: serine palmitoyltransferase, long chain base subunit 1 [Taeniopygia guttata]             |
| isogroup04990   | PREDICTED: similar to phospholipase A2-activating protein [Taeniopygia guttata]                     |
| isogroup05028   | PREDICTED: reelin [Taeniopygia guttata]                                                             |
| isogroup05035   | NA                                                                                                  |
| isogroup05061   | PREDICTED: adaptor-related protein complex 2, beta 1 subunit-like isoform 4 [Oryctolagus cuniculus] |
| isogroup05085   | PREDICTED: hypothetical protein [Monodelphis domestica]                                             |
| isogroup05098   | NA                                                                                                  |
| isogroup05113   | NA                                                                                                  |
| isogroup05219   | PREDICTED: similar to eukaryotic translation initiation factor 4 gamma, 3 [Gallus gallus]           |
| isogroup05301   | PREDICTED: hypothetical protein [Gallus gallus]                                                     |
| isogroup05423   | NA                                                                                                  |
| isogroup05426   | PREDICTED: similar to B-cell CLL/lymphoma 9 [Gallus gallus]                                         |
| isogroup05531   | NA                                                                                                  |

| <b>Isogroup</b> | <b>Annotation from nr Database</b>                                                                       |
|-----------------|----------------------------------------------------------------------------------------------------------|
| isogroup05713   | PREDICTED: similar to nudix (nucleoside diphosphate linked moiety X)-type motif 12 [Taeniopygia guttata] |
| isogroup05751   | PREDICTED: phospholipase C, beta 1 (phosphoinositide-specific) [Taeniopygia guttata]                     |
| isogroup05775   | NA                                                                                                       |
| isogroup05788   | PREDICTED: ecto-NOX disulfide-thiol exchanger 2 [Taeniopygia guttata]                                    |
| isogroup05797   | PREDICTED: multiple PDZ domain protein [Taeniopygia guttata]                                             |
| isogroup05802   | PREDICTED: CD82 molecule [Taeniopygia guttata]                                                           |
| isogroup05906   | PREDICTED: golgi membrane protein 1 [Taeniopygia guttata]                                                |
| isogroup05913   | PREDICTED: microtubule-associated protein 1B isoform 1 [Taeniopygia guttata]                             |
| isogroup05914   | PREDICTED: microtubule-associated protein 1B isoform 1 [Taeniopygia guttata]                             |
| isogroup05930   | PREDICTED: KIAA0020 [Taeniopygia guttata]                                                                |
| isogroup05946   | NA                                                                                                       |
| isogroup06021   | PREDICTED: synuclein, alpha interacting protein (synphilin) [Taeniopygia guttata]                        |
| isogroup06072   | PREDICTED: similar to plasma membrane calcium ATPase 2 isoform 5 [Gallus gallus]                         |
| isogroup06201   | NA                                                                                                       |
| isogroup06263   | PREDICTED: adenomatous polyposis coli [Taeniopygia guttata]                                              |
| isogroup06318   | PREDICTED: RIO kinase 2 [Taeniopygia guttata]                                                            |
| isogroup06427   | NA                                                                                                       |
| isogroup06501   | PREDICTED: microtubule-associated protein 1B isoform 2 [Taeniopygia guttata]                             |
| isogroup06512   | NA                                                                                                       |
| isogroup06584   | PREDICTED: similar to transcription factor AP2-alpha isoform 2 [Ornithorhynchus anatinus]                |
| isogroup06899   | PREDICTED: serum response factor binding protein 1 [Taeniopygia guttata]                                 |
| isogroup06901   | PREDICTED: similar to transmembrane protein 63B [Gallus gallus]                                          |
| isogroup06935   | E3 ubiquitin-protein ligase BRE1A [Gallus gallus]                                                        |
| isogroup06963   | phosphoinositide-3-kinase, class 3 [Mus musculus]                                                        |
| isogroup07010   | PREDICTED: insulin-like growth factor 1 receptor [Taeniopygia guttata]                                   |
| isogroup07071   | PREDICTED: similar to MGC83004 protein [Taeniopygia guttata]                                             |
| isogroup07159   | putative stathmin-like 3 [Taeniopygia guttata]                                                           |
| isogroup07161   | PREDICTED: similar to RING-finger protein [Taeniopygia guttata]                                          |
| isogroup07178   | NA                                                                                                       |
| isogroup07263   | PREDICTED: KIAA0368 [Taeniopygia guttata]                                                                |
| isogroup07269   | NA                                                                                                       |
| isogroup07298   | PREDICTED: family with sequence similarity 108, member B1 [Taeniopygia guttata]                          |

| <b>Isogroup</b> | <b>Annotation from nr Database</b>                                                                      |
|-----------------|---------------------------------------------------------------------------------------------------------|
| isogroup07356   | PREDICTED: hypothetical protein [Taeniopygia guttata]                                                   |
| isogroup07379   | PREDICTED: similar to protocadherin 9 [Sus scrofa]                                                      |
| isogroup07387   | NA                                                                                                      |
| isogroup07477   | PREDICTED: solute carrier family 41, member 2 [Taeniopygia guttata]                                     |
| isogroup07535   | transcription factor 3 (E2A immunoglobulin enhancer binding factors E12/E47) [Gallus gallus]            |
| isogroup07573   | NA                                                                                                      |
| isogroup07587   | PREDICTED: leukemia inhibitory factor receptor [Taeniopygia guttata]                                    |
| isogroup07867   | PREDICTED: DEAD (Asp-Glu-Ala-Asp) box polypeptide 58 [Taeniopygia guttata]                              |
| isogroup07960   | NA                                                                                                      |
| isogroup08049   | NA                                                                                                      |
| isogroup08103   | NA                                                                                                      |
| isogroup08152   | NA                                                                                                      |
| isogroup08183   | NA                                                                                                      |
| isogroup08215   | PREDICTED: similar to glycerophosphodiester phosphodiesterase domain containing 2 [Taeniopygia guttata] |
| isogroup08222   | NA                                                                                                      |
| isogroup08266   | NA                                                                                                      |
| isogroup08325   | PREDICTED: YTH domain containing 2 [Oryctolagus cuniculus]                                              |
| isogroup08376   | PREDICTED: SH3 domain binding glutamic acid-rich protein like 2 [Taeniopygia guttata]                   |
| isogroup08418   | PREDICTED: similar to TBC1 domain family member 2A [Taeniopygia guttata]                                |
| isogroup08425   | PREDICTED: similar to KIAA1438 protein [Gallus gallus]                                                  |
| isogroup08448   | PREDICTED: IQ motif containing E [Taeniopygia guttata]                                                  |
| isogroup08450   | PREDICTED: hypothetical protein, partial [Gallus gallus]                                                |
| isogroup08473   | PREDICTED: similar to KIAA0700 protein [Taeniopygia guttata]                                            |
| isogroup08490   | NA                                                                                                      |
| isogroup08617   | NA                                                                                                      |
| isogroup08621   | NA                                                                                                      |
| isogroup08663   | NA                                                                                                      |
| isogroup08825   | NA                                                                                                      |
| isogroup08834   | PREDICTED: alpha-L-iduronidase [Taeniopygia guttata]                                                    |
| isogroup08873   | NA                                                                                                      |
| isogroup08884   | NA                                                                                                      |
| isogroup08899   | NA                                                                                                      |
| isogroup08971   | NA                                                                                                      |

| <b>Isogroup</b> | <b>Annotation from nr Database</b>                                                                          |
|-----------------|-------------------------------------------------------------------------------------------------------------|
| isogroup09101   | PREDICTED: similar to protein phosphatase 1F (PP2C domain containing) [Taeniopygia guttata]                 |
| isogroup09192   | NA                                                                                                          |
| isogroup09364   | unnamed protein product [Mus musculus]                                                                      |
| isogroup09588   | NA                                                                                                          |
| isogroup09612   | PREDICTED: similar to yeast ribosomal protein S28 homologue [Gallus gallus]                                 |
| isogroup09646   | PREDICTED: hypothetical protein [Gallus gallus]                                                             |
| isogroup09745   | NA                                                                                                          |
| isogroup09920   | NA                                                                                                          |
| isogroup10025   | PREDICTED: similar to family with sequence similarity 102, member A [Taeniopygia guttata]                   |
| isogroup10103   | PREDICTED: hypothetical protein [Taeniopygia guttata]                                                       |
| isogroup10113   | PREDICTED: cytoglobin [Taeniopygia guttata]                                                                 |
| isogroup10114   | PREDICTED: cytoglobin [Taeniopygia guttata]                                                                 |
| isogroup10177   | PREDICTED: monoglyceride lipase [Taeniopygia guttata]                                                       |
| isogroup10195   | PREDICTED: similar to BTB (POZ) domain containing 4 [Canis familiaris]                                      |
| isogroup10211   | NA                                                                                                          |
| isogroup10438   | PREDICTED: hypothetical protein [Taeniopygia guttata]                                                       |
| isogroup10487   | PREDICTED: LIM domain kinase 2 [Taeniopygia guttata]                                                        |
| isogroup10565   | PREDICTED: myeloid/lymphoid or mixed-lineage leukemia (trithorax homolog, Drosophila) [Taeniopygia guttata] |
| isogroup10596   | NA                                                                                                          |
| isogroup10628   | PREDICTED: inositol 1,4,5-triphosphate receptor-I isoform 4 [Oryctolagus cuniculus]                         |
| isogroup10646   | NA                                                                                                          |
| isogroup10647   | NA                                                                                                          |
| isogroup10656   | NA                                                                                                          |
| isogroup10668   | PREDICTED: p21 protein (Cdc42/Rac)-activated kinase 3 isoform 1 [Taeniopygia guttata]                       |
| isogroup10717   | NA                                                                                                          |
| isogroup10743   | PREDICTED: patched [Taeniopygia guttata]                                                                    |
| isogroup10773   | PREDICTED: hypothetical protein [Taeniopygia guttata]                                                       |
| isogroup10827   | PREDICTED: similar to formin 2 [Taeniopygia guttata]                                                        |
| isogroup11007   | PREDICTED: pleckstrin and Sec7 domain containing 3 [Taeniopygia guttata]                                    |
| isogroup11082   | myelin proteolipid protein [Bos taurus]                                                                     |
| isogroup11083   | PREDICTED: similar to hydroxysteroid dehydrogenase like 2 [Taeniopygia guttata]                             |
| isogroup11134   | NA                                                                                                          |

| <b>Isogroup</b> | <b>Annotation from nr Database</b>                                                                                                |
|-----------------|-----------------------------------------------------------------------------------------------------------------------------------|
| isogroup11150   | PREDICTED: similar to KIAA2026 [Pan troglodytes]                                                                                  |
| isogroup11155   | PREDICTED: solute carrier family 45, member 1 [Taeniopygia guttata]                                                               |
| isogroup11177   | unnamed protein product [Homo sapiens]                                                                                            |
| isogroup11231   | PREDICTED: similar to KIAA0372 [Gallus gallus]                                                                                    |
| isogroup11238   | PREDICTED: protein inhibitor of activated STAT X [Taeniopygia guttata]                                                            |
| isogroup11420   | PREDICTED: putative clathrin light polypeptide variant 1a isoform 2 [Taeniopygia guttata]                                         |
| isogroup11472   | PREDICTED: similar to Mediator of RNA polymerase II transcription subunit 1 [Taeniopygia guttata]                                 |
| isogroup11512   | NA                                                                                                                                |
| isogroup11520   | PREDICTED: hypothetical protein [Taeniopygia guttata]                                                                             |
| isogroup11674   | PREDICTED: similar to cAMP responsive element binding protein 3-like 3 [Taeniopygia guttata]                                      |
| isogroup11881   | PREDICTED: hypothetical protein [Taeniopygia guttata]                                                                             |
| isogroup12006   | PREDICTED: hypothetical protein [Gallus gallus]                                                                                   |
| isogroup12018   | NA                                                                                                                                |
| isogroup12023   | NA                                                                                                                                |
| isogroup12033   | PREDICTED: similar to phosphodiesterase 8B [Taeniopygia guttata]                                                                  |
| isogroup12077   | thioredoxin 1 [Melopsittacus undulatus]                                                                                           |
| isogroup12138   | PREDICTED: similar to KIAA0833 protein [Taeniopygia guttata]                                                                      |
| isogroup12163   | PREDICTED: integrator complex subunit 4 [Taeniopygia guttata]                                                                     |
| isogroup12182   | NA                                                                                                                                |
| isogroup12194   | PREDICTED: KIAA0258 [Taeniopygia guttata]                                                                                         |
| isogroup12217   | NA                                                                                                                                |
| isogroup12256   | PREDICTED: inhibitor of kappa light polypeptide gene enhancer in B-cells, kinase complex-associated protein [Taeniopygia guttata] |
| isogroup12315   | NA                                                                                                                                |
| isogroup12327   | PREDICTED: similar to rapamycin-insensitive companion of mTOR [Taeniopygia guttata]                                               |
| isogroup12340   | PREDICTED: Kv channel interacting protein 2 [Taeniopygia guttata]                                                                 |
| isogroup12421   | NA                                                                                                                                |
| isogroup12530   | carboxypeptidase D [Anas platyrhynchos]                                                                                           |
| isogroup12583   | PREDICTED: putative dynactin light chain 3 [Taeniopygia guttata]                                                                  |
| isogroup12585   | NA                                                                                                                                |
| isogroup12666   | PREDICTED: similar to chorea-acanthocytosis [Taeniopygia guttata]                                                                 |
| isogroup12760   | PREDICTED: WD repeat domain 36 [Taeniopygia guttata]                                                                              |
| isogroup12855   | PREDICTED: similar to NDUFA12-like [Gallus gallus]                                                                                |



| <b>Isogroup</b> | <b>Annotation from nr Database</b>                                                                     |
|-----------------|--------------------------------------------------------------------------------------------------------|
| isogroup12913   | PREDICTED: similar to peptidylprolyl isomerase domain and WD repeat containing 1 [Taeniopygia guttata] |
| isogroup12934   | PREDICTED: fem-1 homolog c (C. elegans) [Taeniopygia guttata]                                          |
| isogroup13022   | NA                                                                                                     |
| isogroup13032   | NA                                                                                                     |
| isogroup13045   | NA                                                                                                     |
| isogroup13098   | PREDICTED: NF-M [Taeniopygia guttata]                                                                  |
| isogroup13101   | PREDICTED: similar to phosphatidylinositol glycan, class G [Taeniopygia guttata]                       |
| isogroup13110   | NA                                                                                                     |
| isogroup13125   | PREDICTED: similar to cyclin G associated kinase [Taeniopygia guttata]                                 |
| isogroup13137   | PREDICTED: similar to ankyrin repeat domain protein 17 [Gallus gallus]                                 |
| isogroup13220   | NA                                                                                                     |
| isogroup13247   | NA                                                                                                     |
| isogroup13255   | PREDICTED: similar to diacylglycerol kinase, theta [Taeniopygia guttata]                               |
| isogroup13285   | PREDICTED: adenomatous polyposis coli [Taeniopygia guttata]                                            |
| isogroup13304   | PREDICTED: similar to DIRAS family protein [Taeniopygia guttata]                                       |
| isogroup13357   | PREDICTED: SMC5 protein [Taeniopygia guttata]                                                          |
| isogroup13388   | PREDICTED: hypothetical protein [Taeniopygia guttata]                                                  |
| isogroup13392   | PREDICTED: similar to RUN and SH3 domain containing 2 [Taeniopygia guttata]                            |
| isogroup13455   | NA                                                                                                     |
| isogroup13499   | PREDICTED: neurolysin (metallopeptidase M3 family) [Taeniopygia guttata]                               |
| isogroup13518   | NA                                                                                                     |
| isogroup13712   | PREDICTED: small glutamine-rich tetratricopeptide repeat (TPR)-containing, beta [Taeniopygia guttata]  |
| isogroup13741   | NA                                                                                                     |
| isogroup13761   | PREDICTED: putative Adenylate kinase 3 alpha like 1 variant 1 [Taeniopygia guttata]                    |
| isogroup13887   | PREDICTED: superkiller viralicidic activity 2-like 2 [Taeniopygia guttata]                             |
| isogroup13892   | PREDICTED: fucosyltransferase 10 (alpha (1,3) fucosyltransferase) [Taeniopygia guttata]                |
| isogroup13911   | NA                                                                                                     |
| isogroup14031   | carboxypeptidase D [Anas platyrhynchos]                                                                |
| isogroup14246   | chromo-helicase DNA-binding protein [Zonotrichia albicollis]                                           |
| isogroup14285   | PREDICTED: WD repeat domain 36 [Taeniopygia guttata]                                                   |
| isogroup14475   | PREDICTED: similar to 2210408I21Rik protein [Taeniopygia guttata]                                      |
| isogroup14499   | PREDICTED: hypothetical protein [Taeniopygia guttata]                                                  |

| <b>Isogroup</b> | <b>Annotation from nr Database</b>                                                                                                                  |
|-----------------|-----------------------------------------------------------------------------------------------------------------------------------------------------|
| isogroup14583   | PREDICTED: platelet-activating factor acetylhydrolase, isoform Ib, beta subunit 30kDa [Taeniopygia guttata]                                         |
| isogroup14614   | PRMT1 protein [Homo sapiens]                                                                                                                        |
| isogroup14692   | PREDICTED: similar to ribosomal protein L7-like 1 [Taeniopygia guttata]                                                                             |
| isogroup14706   | PREDICTED: inhibitor of kappa light polypeptide gene enhancer in B-cells, kinase complex-associated protein [Taeniopygia guttata]                   |
| isogroup14719   | PREDICTED: similar to Katanin p60 ATPase-containing subunit A-like 2 [Taeniopygia guttata]                                                          |
| isogroup14749   | PREDICTED: chromosome 9 open reading frame 95 [Taeniopygia guttata]                                                                                 |
| isogroup14750   | PREDICTED: hypothetical protein [Taeniopygia guttata]                                                                                               |
| isogroup14767   | PREDICTED: similar to Centrin, EF-hand protein, 3 (CDC31 homolog, yeast) [Gallus gallus]                                                            |
| isogroup14784   | NA                                                                                                                                                  |
| isogroup14801   | NA                                                                                                                                                  |
| isogroup14823   | PREDICTED: similar to chorea-acanthocytosis [Taeniopygia guttata]                                                                                   |
| isogroup14880   | PREDICTED: ankyrin repeat, family A (RFXANK-like), 2 [Taeniopygia guttata]                                                                          |
| isogroup14905   | PREDICTED: excision repair cross-complementing rodent repair deficiency, complementation group 8 [Taeniopygia guttata]                              |
| isogroup15050   | PREDICTED: MAP-kinase activating death domain isoform 2 [Taeniopygia guttata]                                                                       |
| isogroup15067   | PREDICTED: spectrin, alpha, non-erythrocytic 1 (alpha-fodrin) isoform 1 [Taeniopygia guttata]                                                       |
| isogroup15123   | putative autophagy 12-like [Taeniopygia guttata]                                                                                                    |
| isogroup15166   | PREDICTED: hypothetical protein [Taeniopygia guttata]                                                                                               |
| isogroup15221   | NA                                                                                                                                                  |
| isogroup15225   | PREDICTED: haloacid dehalogenase-like hydrolase domain containing 2 [Taeniopygia guttata]                                                           |
| isogroup15228   | PREDICTED: phospholipase C, beta 1 (phosphoinositide-specific) [Taeniopygia guttata]                                                                |
| isogroup15289   | PREDICTED: KIAA0368 [Taeniopygia guttata]                                                                                                           |
| isogroup15296   | PREDICTED: similar to semaphorin SEMA6A1 [Gallus gallus]                                                                                            |
| isogroup15384   | methylcrotonoyl-Coenzyme A carboxylase 2 (beta) [Xenopus laevis]                                                                                    |
| isogroup15457   | NA                                                                                                                                                  |
| isogroup15468   | PREDICTED: protocadherin 9 [Taeniopygia guttata]                                                                                                    |
| isogroup15511   | NA                                                                                                                                                  |
| isogroup15537   | NA                                                                                                                                                  |
| isogroup15645   | NA                                                                                                                                                  |
| isogroup15674   | sodium/potassium-transporting ATPase subunit alpha-3 [Gallus gallus]                                                                                |
| isogroup15684   | PREDICTED: similar to solute carrier family 1 (neuronal/epithelial high affinity glutamate transporter, system Xag), member 1 [Taeniopygia guttata] |

| <b>Isogroup</b> | <b>Annotation from nr Database</b>                                                                                      |
|-----------------|-------------------------------------------------------------------------------------------------------------------------|
| isogroup15700   | PREDICTED: similar to RING-finger protein [Taeniopygia guttata]                                                         |
| isogroup15718   | NA                                                                                                                      |
| isogroup15800   | PREDICTED: hypothetical protein [Gallus gallus]                                                                         |
| isogroup15822   | PREDICTED: pentatricopeptide repeat domain 2 [Taeniopygia guttata]                                                      |
| isogroup15855   | NA                                                                                                                      |
| isogroup15857   | NA                                                                                                                      |
| isogroup15869   | PREDICTED: RMI1, RecQ mediated genome instability 1, homolog [Taeniopygia guttata]                                      |
| isogroup15889   | protein mab-21-like 1 [Homo sapiens]                                                                                    |
| isogroup15905   | PREDICTED: tetratricopeptide repeat domain 33 [Taeniopygia guttata]                                                     |
| isogroup15918   | PREDICTED: corneal wound healing-related protein [Taeniopygia guttata]                                                  |
| isogroup15928   | PREDICTED: similar to DnaJ (Hsp40) homolog, subfamily C, member 21 [Taeniopygia guttata]                                |
| isogroup16017   | PREDICTED: hypothetical protein [Taeniopygia guttata]                                                                   |
| isogroup16030   | NA                                                                                                                      |
| isogroup16139   | PREDICTED: similar to KIAA1281 protein [Taeniopygia guttata]                                                            |
| isogroup16198   | NA                                                                                                                      |
| isogroup16213   | PREDICTED: corneal wound healing-related protein [Taeniopygia guttata]                                                  |
| isogroup16268   | PREDICTED: centrosomal protein 78kDa [Taeniopygia guttata]                                                              |
| isogroup16272   | NA                                                                                                                      |
| isogroup16303   | PREDICTED: similar to Hepatocyte nuclear factor 6 (HNF-6) (One cut domain family member 1) isoform 1 [Canis familiaris] |
| isogroup16345   | hydroxysteroid (17-beta) dehydrogenase 4 [Gallus gallus]                                                                |
| isogroup16360   | PREDICTED: aprataxin [Taeniopygia guttata]                                                                              |
| isogroup16435   | NA                                                                                                                      |
| isogroup16459   | NA                                                                                                                      |
| isogroup16535   | NA                                                                                                                      |
| isogroup16556   | PREDICTED: SEC24 family, member C (S. cerevisiae) [Taeniopygia guttata]                                                 |
| isogroup16568   | PREDICTED: neurotrophic tyrosine kinase, receptor, type 2, partial [Taeniopygia guttata]                                |
| isogroup16569   | AF355752_1 reverse transcriptase [Chelonia mydas]                                                                       |
| isogroup16607   | PREDICTED: hyperpolarization activated cyclic nucleotide-gated potassium channel 2 [Taeniopygia guttata]                |
| isogroup16608   | NA                                                                                                                      |
| isogroup16622   | NA                                                                                                                      |
| isogroup16656   | PREDICTED: general transcription factor IIH, polypeptide 2, 44kD subunit isoform 8 [Pan troglodytes]                    |
| isogroup16713   | NA                                                                                                                      |

| <b>Isogroup</b> | <b>Annotation from nr Database</b>                                                                                                                |
|-----------------|---------------------------------------------------------------------------------------------------------------------------------------------------|
| isogroup16722   | NA                                                                                                                                                |
| isogroup16723   | PREDICTED: LMBR1 domain containing 2 [Taeniopygia guttata]                                                                                        |
| isogroup16831   | NA                                                                                                                                                |
| isogroup16879   | PREDICTED: similar to Small nuclear RNA activating complex, polypeptide 3 [Gallus gallus]                                                         |
| isogroup16885   | NA                                                                                                                                                |
| isogroup16937   | PREDICTED: inositol 1,3,4-triphosphate 5/6 kinase [Taeniopygia guttata]                                                                           |
| isogroup16964   | NA                                                                                                                                                |
| isogroup17042   | NA                                                                                                                                                |
| isogroup17083   | PREDICTED: similar to AP-3 complex subunit beta-1 [Taeniopygia guttata]                                                                           |
| isogroup17092   | PREDICTED: similar to protein tyrosine kinase fer isoform 1 [Bos taurus]                                                                          |
| isogroup17106   | PREDICTED: similar to alpha-L-iduronidase, partial [Taeniopygia guttata]                                                                          |
| isogroup17110   | NA                                                                                                                                                |
| isogroup17131   | NA                                                                                                                                                |
| isogroup17154   | PREDICTED: minichromosome maintenance complex component 3 associated protein [Taeniopygia guttata]                                                |
| isogroup17195   | PREDICTED: hypothetical protein [Taeniopygia guttata]                                                                                             |
| isogroup17198   | PREDICTED: SET binding protein 1 [Taeniopygia guttata]                                                                                            |
| isogroup17210   | PREDICTED: hypothetical protein [Taeniopygia guttata]                                                                                             |
| isogroup17243   | PREDICTED: transient receptor potential cation channel, subfamily M, member 3 [Taeniopygia guttata]                                               |
| isogroup17286   | NA                                                                                                                                                |
| isogroup17296   | PREDICTED: histidine acid phosphatase domain containing 1 [Taeniopygia guttata]                                                                   |
| isogroup17309   | PREDICTED: upstream binding transcription factor, RNA polymerase I [Equus caballus]                                                               |
| isogroup17356   | PREDICTED: similar to ring finger protein 38 [Monodelphis domestica]                                                                              |
| isogroup17372   | talin 1 [Gallus gallus]                                                                                                                           |
| isogroup17408   | PREDICTED: polymerase (DNA directed) kappa, partial [Taeniopygia guttata]                                                                         |
| isogroup17573   | PREDICTED: sema domain, immunoglobulin domain (Ig), transmembrane domain (TM) and short cytoplasmic domain, (semaphorin) 4D [Taeniopygia guttata] |
| isogroup17579   | NA                                                                                                                                                |
| isogroup17604   | sorting nexin 2 [Gallus gallus]                                                                                                                   |
| isogroup17609   | NA                                                                                                                                                |
| isogroup17874   | PREDICTED: hypothetical protein [Taeniopygia guttata]                                                                                             |
| isogroup17888   | NA                                                                                                                                                |
| isogroup17919   | PREDICTED: calsyntenin 1 [Taeniopygia guttata]                                                                                                    |
| isogroup17971   | NA                                                                                                                                                |

| <b>Isogroup</b> | <b>Annotation from nr Database</b>                                                                           |
|-----------------|--------------------------------------------------------------------------------------------------------------|
| isogroup18008   | PREDICTED: protein inhibitor of activated STAT X [Taeniopygia guttata]                                       |
| isogroup18135   | PREDICTED: hypothetical protein [Taeniopygia guttata]                                                        |
| isogroup18252   | PREDICTED: similar to cytoplasmic dynein 1 heavy chain 1 [Taeniopygia guttata]                               |
| isogroup18497   | putative DnaJ subfamily A member 1 variant 3 [Taeniopygia guttata]                                           |
| isogroup18615   | kinesin family member 3B [Gallus gallus]                                                                     |
| isogroup18645   | NA                                                                                                           |
| isogroup18708   | PREDICTED: similar to Hippocampus abundant transcript-like protein 1 [Taeniopygia guttata]                   |
| isogroup18739   | PREDICTED: hypothetical protein [Taeniopygia guttata]                                                        |
| isogroup18743   | PREDICTED: similar to G elongation factor, mitochondrial 2 [Taeniopygia guttata]                             |
| isogroup18777   | PREDICTED: insulin-like growth factor 1 receptor [Taeniopygia guttata]                                       |
| isogroup18865   | NA                                                                                                           |
| isogroup18887   | PREDICTED: similar to ring finger protein 38 [Monodelphis domestica]                                         |
| isogroup18904   | NA                                                                                                           |
| isogroup19029   | PREDICTED: fer (fps/fes related) tyrosine kinase (phosphoprotein NCP94) [Taeniopygia guttata]                |
| isogroup19076   | PREDICTED: similar to KIAA1119 protein [Monodelphis domestica]                                               |
| isogroup19160   | PREDICTED: solute carrier family 12 (sodium/potassium/chloride transporters), member 2 [Taeniopygia guttata] |
| isogroup19188   | NA                                                                                                           |
| isogroup19270   | NA                                                                                                           |
| isogroup19414   | NA                                                                                                           |
| isogroup19416   | PREDICTED: neuronal protein 3.1 [Taeniopygia guttata]                                                        |
| isogroup19477   | PREDICTED: hypothetical protein [Taeniopygia guttata]                                                        |
| isogroup19565   | NA                                                                                                           |
| isogroup19575   | NA                                                                                                           |
| isogroup19619   | NA                                                                                                           |
| isogroup19650   | NA                                                                                                           |
| isogroup19721   | guanine nucleotide-binding protein G(I)/G(S)/G(O) subunit gamma-3 precursor [Mus musculus]                   |
| isogroup19808   | PREDICTED: fibroblast growth factor 10 [Taeniopygia guttata]                                                 |
| isogroup20096   | NA                                                                                                           |
| isogroup20144   | NA                                                                                                           |
| isogroup20211   | PREDICTED: similar to arylsulfatase B [Taeniopygia guttata]                                                  |
| isogroup20235   | PREDICTED: signal-induced proliferation-associated 1 like 2 [Taeniopygia guttata]                            |
| isogroup20237   | PREDICTED: centrosomal protein 78kDa [Taeniopygia guttata]                                                   |
| isogroup20295   | NA                                                                                                           |

| <b>Isogroup</b> | <b>Annotation from nr Database</b>                                                                                |
|-----------------|-------------------------------------------------------------------------------------------------------------------|
| isogroup20328   | PREDICTED: hypothetical protein [Taeniopygia guttata]                                                             |
| isogroup20463   | PREDICTED: similar to cyclin G associated kinase [Taeniopygia guttata]                                            |
| isogroup20470   | PREDICTED: similar to DnaJ (Hsp40) homolog, subfamily C, member 21 [Taeniopygia guttata]                          |
| isogroup20549   | NA                                                                                                                |
| isogroup20555   | PREDICTED: similar to transcription factor IIIB 150 [Taeniopygia guttata]                                         |
| isogroup20562   | NA                                                                                                                |
| isogroup20569   | PREDICTED: similar to deleted in liver cancer 1 [Taeniopygia guttata]                                             |
| isogroup20578   | NA                                                                                                                |
| isogroup20683   | NA                                                                                                                |
| isogroup20772   | PREDICTED: hypothetical protein [Taeniopygia guttata]                                                             |
| isogroup20776   | PREDICTED: similar to TBC1 domain family member 2A [Taeniopygia guttata]                                          |
| isogroup20800   | NA                                                                                                                |
| isogroup20829   | NA                                                                                                                |
| isogroup20938   | NA                                                                                                                |
| isogroup20993   | PREDICTED: similar to oxytocinase splice [Gallus gallus]                                                          |
| isogroup21006   | PREDICTED: cyclin-dependent kinase-like 5 [Taeniopygia guttata]                                                   |
| isogroup21015   | NA                                                                                                                |
| isogroup21055   | NA                                                                                                                |
| isogroup21092   | PREDICTED: similar to KIAA0456 protein [Taeniopygia guttata]                                                      |
| isogroup21194   | PREDICTED: amyloid beta (A4) precursor protein-binding, family A, member 1 [Taeniopygia guttata]                  |
| isogroup21279   | PREDICTED: jumonji domain containing 2C [Taeniopygia guttata]                                                     |
| isogroup21281   | PREDICTED: hypothetical protein [Taeniopygia guttata]                                                             |
| isogroup21321   | PREDICTED: similar to monogenic, audiogenic seizure susceptibility 1 homolog (mouse), [Monodelphis domestica]     |
| isogroup21329   | PREDICTED: WD repeat domain 41 [Taeniopygia guttata]                                                              |
| isogroup21350   | NA                                                                                                                |
| isogroup21399   | NA                                                                                                                |
| isogroup21426   | PREDICTED: endothelial differentiation, lysophosphatidic acid G-protein-coupled receptor, 2 [Taeniopygia guttata] |
| isogroup21436   | PREDICTED: similar to PLCG1 variant protein [Monodelphis domestica]                                               |
| isogroup21454   | PREDICTED: interleukin 6 signal transducer (gp130, oncostatin M receptor) [Taeniopygia guttata]                   |
| isogroup21606   | NA                                                                                                                |
| isogroup21656   | PREDICTED: similar to ubiquitin-like with PHD and ring finger domains 2, partial [Taeniopygia guttata]            |
| isogroup21778   | PREDICTED: similar to C1orf15 [Gallus gallus]                                                                     |

| <b>Isogroup</b> | <b>Annotation from nr Database</b>                                                               |
|-----------------|--------------------------------------------------------------------------------------------------|
| isogroup21857   | PREDICTED: similar to phosphatidylinositol glycan, class G [Taeniopygia guttata]                 |
| isogroup21886   | PREDICTED: osteoclast stimulating factor 1 [Taeniopygia guttata]                                 |
| isogroup21953   | NA                                                                                               |
| isogroup22026   | NA                                                                                               |
| isogroup22027   | NA                                                                                               |
| isogroup22037   | NA                                                                                               |
| isogroup22044   | PREDICTED: hypothetical protein [Taeniopygia guttata]                                            |
| isogroup22075   | PREDICTED: similar to FCH domain only protein 2 [Taeniopygia guttata]                            |
| isogroup22087   | hypothetical protein [Taeniopygia guttata]                                                       |
| isogroup22190   | PREDICTED: similar to ankyrin repeat-containing cofactor-1 [Gallus gallus]                       |
| isogroup22217   | NA                                                                                               |
| isogroup22257   | PREDICTED: hypothetical protein [Taeniopygia guttata]                                            |
| isogroup22262   | PREDICTED: zinc finger, CCHC domain containing 6 [Taeniopygia guttata]                           |
| isogroup22270   | PREDICTED: similar to guanine nucleotide exchange factor [Gallus gallus]                         |
| isogroup22357   | NA                                                                                               |
| isogroup22417   | PREDICTED: hypothetical protein [Taeniopygia guttata]                                            |
| isogroup22481   | PREDICTED: hypothetical protein [Gallus gallus]                                                  |
| isogroup22504   | PREDICTED: similar to dishevelled-associated activator of morphogenesis 1 [Gallus gallus]        |
| isogroup22507   | NA                                                                                               |
| isogroup22548   | coatomer protein complex, subunit alpha [Gallus gallus]                                          |
| isogroup22565   | PREDICTED: microtubule-associated protein 1A [Taeniopygia guttata]                               |
| isogroup22576   | PREDICTED: hypothetical protein [Gallus gallus]                                                  |
| isogroup22601   | PREDICTED: similar to X-ray repair cross complementing protein 4 [Taeniopygia guttata]           |
| isogroup22667   | NA                                                                                               |
| isogroup22700   | PREDICTED: similar to axonal transport of synaptic vesicles isoform 2 [Ornithorhynchus anatinus] |
| isogroup22706   | NA                                                                                               |
| isogroup22714   | NA                                                                                               |
| isogroup22726   | PREDICTED: multiple PDZ domain protein [Taeniopygia guttata]                                     |
| contig90135     | NA                                                                                               |
| contig90188     | NA                                                                                               |

**Supplementary Table 2. Genes expressed higher in females than males in the medial amygdala.**

| <b>Isogroup</b> | <b>Annotation from nr Database</b>                                                                   |
|-----------------|------------------------------------------------------------------------------------------------------|
| isogroup00008   | PREDICTED: similar to UTP18, small subunit processome component [Taeniopygia guttata]                |
| isogroup00027   | PREDICTED: similar to coiled-coil domain containing 5 [Taeniopygia guttata]                          |
| isogroup00028   | adipocyte differentiation-related protein [Gallus gallus]                                            |
| isogroup00032   | NA                                                                                                   |
| isogroup00052   | NA                                                                                                   |
| isogroup00073   | NA                                                                                                   |
| isogroup00097   | PREDICTED: transforming, acidic coiled-coil containing protein 3 [Taeniopygia guttata]               |
| isogroup00147   | NA                                                                                                   |
| isogroup00182   | PREDICTED: similar to pol-like protein ENS-3 [Taeniopygia guttata]                                   |
| isogroup00204   | PREDICTED: hypothetical protein [Gallus gallus]                                                      |
| isogroup00230   | NA                                                                                                   |
| isogroup00260   | PREDICTED: similar to Gag-Pro-Pol-Env protein [Taeniopygia guttata]                                  |
| isogroup00396   | PREDICTED: similar to KIAA1892 protein - DDB1- and CUL4-associated factor 12 [Monodelphis domestica] |
| isogroup00459   | NA                                                                                                   |
| isogroup00499   | PREDICTED: hypothetical protein [Taeniopygia guttata]                                                |
| isogroup00520   | PREDICTED: metallophosphoesterase 1 [Taeniopygia guttata]                                            |
| isogroup00545   | PREDICTED: hypothetical protein [Taeniopygia guttata]                                                |
| isogroup00584   | PREDICTED: phosphotriesterase related [Taeniopygia guttata]                                          |
| isogroup00657   | PREDICTED: similar to POLG2 protein [Taeniopygia guttata]                                            |
| isogroup00660   | PREDICTED: similar to polyprotein [Taeniopygia guttata]                                              |
| isogroup00829   | PREDICTED: collagen, type IV, alpha 3 (Goodpasture antigen) binding protein [Taeniopygia guttata]    |
| isogroup00842   | PREDICTED: similar to Gag-Pro-Pol-Env protein [Taeniopygia guttata]                                  |
| isogroup00849   | activated RNA polymerase II transcriptional coactivator p15 [Gallus gallus]                          |
| isogroup00993   | PREDICTED: similar to interleukin 22-binding protein [Taeniopygia guttata]                           |
| isogroup01113   | NA                                                                                                   |
| isogroup01222   | PREDICTED: similar to pol-like protein ENS-3, partial [Taeniopygia guttata]                          |
| isogroup01269   | valosin-containing protein [Gallus gallus]                                                           |
| isogroup01578   | NA                                                                                                   |
| isogroup01716   | PREDICTED: similar to potassium channel modulatory factor 1 [Taeniopygia guttata]                    |
| isogroup01999   | NA                                                                                                   |
| isogroup02339   | PREDICTED: similar to opioid receptor, kappa 1 [Taeniopygia guttata]                                 |
| isogroup02469   | putative protein kinase C inhibitor/ASWZ [Taeniopygia guttata]                                       |



| <b>Isogroup</b> | <b>Annotation from nr Database</b>                                                                |
|-----------------|---------------------------------------------------------------------------------------------------|
| isogroup02829   | PREDICTED: similar to ARKadia-like 1 isoform 2 [Taeniopygia guttata]                              |
| isogroup02863   | NA                                                                                                |
| isogroup02965   | PREDICTED: similar to WD repeat domain 51A [Gallus gallus]                                        |
| isogroup03020   | PREDICTED: ankyrin repeat, SAM and basic leucine zipper domain containing 1 [Taeniopygia guttata] |
| isogroup03130   | NA                                                                                                |
| isogroup03190   | PREDICTED: hypothetical protein [Gallus gallus]                                                   |
| isogroup03286   | PREDICTED: similar to early response to neural induction ERNI [Gallus gallus]                     |
| isogroup03670   | NA                                                                                                |
| isogroup03755   | putative neurotensin variant 1 [Taeniopygia guttata]                                              |
| isogroup03875   | PREDICTED: hypothetical protein [Gallus gallus]                                                   |
| isogroup03917   | NA                                                                                                |
| isogroup04099   | NA                                                                                                |
| isogroup04108   | PREDICTED: centromere protein Q [Taeniopygia guttata]                                             |
| isogroup04353   | NA                                                                                                |
| isogroup04474   | NA                                                                                                |
| isogroup04509   | PREDICTED: similar to Adenylate kinase isoenzyme 5, partial [Taeniopygia guttata]                 |
| isogroup04679   | NA                                                                                                |
| isogroup04702   | NA                                                                                                |
| isogroup04710   | unnamed protein product [Homo sapiens]                                                            |
| isogroup04876   | NA                                                                                                |
| isogroup04878   | NA                                                                                                |
| isogroup04887   | PREDICTED: enoyl Coenzyme A hydratase domain containing 2 [Taeniopygia guttata]                   |
| isogroup04912   | NA                                                                                                |
| isogroup05078   | NA                                                                                                |
| isogroup05190   | PREDICTED: similar to Gag polyprotein [Taeniopygia guttata]                                       |
| isogroup05470   | NA                                                                                                |
| isogroup05551   | NA                                                                                                |
| isogroup05793   | PREDICTED: similar to polyprotein [Taeniopygia guttata]                                           |
| isogroup05794   | NA                                                                                                |
| isogroup06101   | PREDICTED: similar to rCG43799 [Taeniopygia guttata]                                              |
| isogroup06103   | NA                                                                                                |
| isogroup06151   | NA                                                                                                |
| isogroup06322   | NA                                                                                                |
| isogroup06326   | tumor necrosis factor, alpha-induced protein 6 [Gallus gallus]                                    |

| <b>Isogroup</b> | <b>Annotation from nr Database</b>                                                                                   |
|-----------------|----------------------------------------------------------------------------------------------------------------------|
| isogroup06361   | NA                                                                                                                   |
| isogroup06396   | NA                                                                                                                   |
| isogroup06400   | YK047_HUMAN RecName: Full=Putative Ig-like domain-containing protein DKFZp686O24166/DKFZp686I21167; Flags: Precursor |
| isogroup06423   | NA                                                                                                                   |
| isogroup06470   | PREDICTED: similar to Gag-Pro-Pol-Env protein [Taeniopygia guttata]                                                  |
| isogroup06762   | NA                                                                                                                   |
| isogroup06853   | NA                                                                                                                   |
| isogroup07047   | NA                                                                                                                   |
| isogroup07054   | PREDICTED: hypothetical protein [Taeniopygia guttata]                                                                |
| isogroup07155   | NA                                                                                                                   |
| isogroup07236   | NA                                                                                                                   |
| isogroup07917   | NA                                                                                                                   |
| isogroup07950   | MC4R [Anser anser]                                                                                                   |
| isogroup08029   | NA                                                                                                                   |
| isogroup08046   | NA                                                                                                                   |
| isogroup08283   | NA                                                                                                                   |
| isogroup08540   | NA                                                                                                                   |
| isogroup08616   | NA                                                                                                                   |
| isogroup08914   | NA                                                                                                                   |
| isogroup09039   | NA                                                                                                                   |
| isogroup09204   | NA                                                                                                                   |
| isogroup09649   | PREDICTED: hypothetical protein [Taeniopygia guttata]                                                                |
| isogroup09947   | NA                                                                                                                   |
| isogroup10000   | NA                                                                                                                   |
| isogroup10287   | NA                                                                                                                   |
| isogroup10489   | NA                                                                                                                   |
| isogroup10497   | NA                                                                                                                   |
| isogroup10572   | hypothetical protein LOC422926 [Gallus gallus]                                                                       |
| isogroup10667   | transcription factor BTF3 isoform 1 [Mus musculus]                                                                   |
| isogroup10762   | NA                                                                                                                   |
| isogroup10781   | PREDICTED: similar to Gag-Pro-Pol protein [Taeniopygia guttata]                                                      |
| isogroup10805   | NA                                                                                                                   |
| isogroup10971   | NA                                                                                                                   |
| isogroup11168   | PREDICTED: similar to gag-pro-pol polyprotein [Taeniopygia guttata]                                                  |
| isogroup11389   | NA                                                                                                                   |

| <b>Isogroup</b> | <b>Annotation from nr Database</b>                                                                               |
|-----------------|------------------------------------------------------------------------------------------------------------------|
| isogroup11430   | NA                                                                                                               |
| isogroup11507   | NA                                                                                                               |
| isogroup11565   | NA                                                                                                               |
| isogroup12398   | NA                                                                                                               |
| isogroup12400   | PREDICTED: similar to polymerase [Taeniopygia guttata]                                                           |
| isogroup12731   | NA                                                                                                               |
| isogroup12784   | PREDICTED: retinal G-protein coupled receptor [Taeniopygia guttata]                                              |
| isogroup13068   | PREDICTED: similar to MEX3C [Ornithorhynchus anatinus]                                                           |
| isogroup13176   | NA                                                                                                               |
| isogroup13527   | NA                                                                                                               |
| isogroup13857   | PREDICTED: hypothetical protein [Gallus gallus]                                                                  |
| isogroup13902   | NA                                                                                                               |
| isogroup14050   | PREDICTED: putative preproenkephalin 1 [Taeniopygia guttata]                                                     |
| isogroup14064   | PREDICTED: similar to pol-like protein ENS-3, partial [Taeniopygia guttata]                                      |
| isogroup14780   | NA                                                                                                               |
| isogroup14976   | NA                                                                                                               |
| isogroup15028   | NA                                                                                                               |
| isogroup15127   | hypothetical protein PANDA_012261 [Ailuropoda melanoleuca]                                                       |
| isogroup15585   | NA                                                                                                               |
| isogroup15617   | ribosomal protein S13 [synthetic construct]                                                                      |
| isogroup15653   | PREDICTED: similar to pol protein [Ornithorhynchus anatinus]                                                     |
| isogroup15823   | PREDICTED: galanin receptor 3 [Taeniopygia guttata]                                                              |
| isogroup16070   | NA                                                                                                               |
| isogroup16168   | PREDICTED: hypothetical protein [Taeniopygia guttata]                                                            |
| isogroup16200   | PREDICTED: similar to Envelope glycoprotein [Taeniopygia guttata]                                                |
| isogroup16214   | PREDICTED: similar to trans-Golgi protein GMx33 [Gallus gallus]                                                  |
| isogroup16245   | NA                                                                                                               |
| isogroup16354   | PREDICTED: similar to Gag-Pro-Pol-Env protein [Taeniopygia guttata]                                              |
| isogroup16521   | NA                                                                                                               |
| isogroup16621   | NA                                                                                                               |
| isogroup16842   | PREDICTED: similar to mCG21813 [Taeniopygia guttata]                                                             |
| isogroup16889   | PREDICTED: similar to polymerase (RNA) III (DNA directed) polypeptide H (22.9kD) isoform 2 [Taeniopygia guttata] |
| isogroup17167   | NA                                                                                                               |
| isogroup17181   | NA                                                                                                               |
| isogroup17199   | POL-like [Gallus gallus]                                                                                         |

| <b>Isogroup</b> | <b>Annotation from nr Database</b>                                                                            |
|-----------------|---------------------------------------------------------------------------------------------------------------|
| isogroup17235   | NA                                                                                                            |
| isogroup17458   | PREDICTED: zinc finger, CCHC domain containing 4 [Taeniopygia guttata]                                        |
| isogroup17762   | NA                                                                                                            |
| isogroup18340   | NA                                                                                                            |
| isogroup18344   | PREDICTED: PDZ domain containing RING finger 4 [Taeniopygia guttata]                                          |
| isogroup18919   | NA                                                                                                            |
| isogroup18978   | PREDICTED: similar to polymerase [Taeniopygia guttata]                                                        |
| isogroup19033   | NA                                                                                                            |
| isogroup19043   | env [Bonasa umbellus]                                                                                         |
| isogroup19260   | NA                                                                                                            |
| isogroup19287   | PREDICTED: TATA box binding protein (TBP)-associated factor, RNA polymerase I, B, 63kDa [Taeniopygia guttata] |
| isogroup19308   | PREDICTED: solute carrier family 18 (vesicular monoamine), member 2 [Taeniopygia guttata]                     |
| isogroup19373   | hypothetical protein [Gallus gallus]                                                                          |
| isogroup19448   | PREDICTED: similar to pol protein [Taeniopygia guttata]                                                       |
| isogroup19487   | NA                                                                                                            |
| isogroup19506   | NA                                                                                                            |
| isogroup19515   | NA                                                                                                            |
| isogroup19542   | NA                                                                                                            |
| isogroup19731   | NA                                                                                                            |
| isogroup19892   | cdc48 [Larimichthys crocea]                                                                                   |
| isogroup20100   | PREDICTED: similar to alpha-kinase 2 [Taeniopygia guttata]                                                    |
| isogroup20441   | NA                                                                                                            |
| isogroup20545   | NA                                                                                                            |
| isogroup20788   | NA                                                                                                            |
| isogroup21027   | PREDICTED: hypothetical protein [Taeniopygia guttata]                                                         |
| isogroup21227   | NA                                                                                                            |
| isogroup21286   | NA                                                                                                            |
| isogroup21319   | NA                                                                                                            |
| isogroup21653   | NA                                                                                                            |
| isogroup21676   | NA                                                                                                            |
| isogroup21763   | PREDICTED: similar to Gag-Pro-Pol-Env protein [Taeniopygia guttata]                                           |
| isogroup21866   | NA                                                                                                            |
| isogroup22080   | NA                                                                                                            |
| isogroup22154   | NA                                                                                                            |

| <b>Isogroup</b> | <b>Annotation from nr Database</b>                                                  |
|-----------------|-------------------------------------------------------------------------------------|
| isogroup22206   | mKIAA1376 protein [Mus musculus]                                                    |
| isogroup22521   | NA                                                                                  |
| isogroup22599   | PREDICTED: v-Ha-ras Harvey rat sarcoma viral oncogene homolog [Taeniopygia guttata] |
| isogroup22629   | NA                                                                                  |
| contig90185     | NA                                                                                  |

**Supplementary Table 3. Gene Ontology terms over-represented among genes significantly differentially expressed between males and females in the medial amygdala.**

| <b>GO ID</b> | <b>GO Description</b>                                            |
|--------------|------------------------------------------------------------------|
| GO:0000079   | regulation of cyclin-dependent protein kinase activity           |
| GO:0000910   | cytokinesis                                                      |
| GO:0001649   | osteoblast differentiation                                       |
| GO:0006916   | anti-apoptosis                                                   |
| GO:0007018   | microtubule-based movement                                       |
| GO:0007019   | microtubule depolymerization                                     |
| GO:0007033   | vacuole organization                                             |
| GO:0007265   | Ras protein signal transduction                                  |
| GO:0009636   | response to toxin                                                |
| GO:0010740   | positive regulation of intracellular protein kinase cascade      |
| GO:0014075   | response to amine stimulus                                       |
| GO:0019058   | viral infectious cycle                                           |
| GO:0030041   | actin filament polymerization                                    |
| GO:0030307   | positive regulation of cell growth                               |
| GO:0031016   | pancreas development                                             |
| GO:0031103   | axon regeneration                                                |
| GO:0031269   | pseudopodium assembly                                            |
| GO:0031929   | TOR signaling cascade                                            |
| GO:0033273   | response to vitamin                                              |
| GO:0034968   | histone lysine methylation                                       |
| GO:0043627   | response to estrogen stimulus                                    |
| GO:0045841   | negative regulation of mitotic metaphase/anaphase transition     |
| GO:0046519   | sphingoid metabolic process                                      |
| GO:0048732   | gland development                                                |
| GO:0050673   | epithelial cell proliferation                                    |
| GO:0051313   | attachment of spindle microtubules to chromosome                 |
| GO:0051914   | positive regulation of synaptic plasticity by chemical substance |
| GO:0060429   | epithelium development                                           |
| GO:0070507   | regulation of microtubule cytoskeleton organization              |
| GO:0004620   | phospholipase activity                                           |
| GO:0004713   | protein tyrosine kinase activity                                 |
| GO:0004896   | cytokine receptor activity                                       |
| GO:0005496   | steroid binding                                                  |
| GO:0008528   | G-protein coupled peptide receptor activity                      |

| <b>GO ID</b> | <b>GO Description</b>                  |
|--------------|----------------------------------------|
| GO:0015631   | tubulin binding                        |
| GO:0016408   | C-acyltransferase activity             |
| GO:0019207   | kinase regulator activity              |
| GO:0019838   | growth factor binding                  |
| GO:0019900   | kinase binding                         |
| GO:0032559   | adenyl ribonucleotide binding          |
| GO:0035004   | phosphatidylinositol 3-kinase activity |
| GO:0050839   | cell adhesion molecule binding         |
| GO:0015630   | microtubule cytoskeleton               |
| GO:0043005   | neuron projection                      |
| GO:0044430   | cytoskeletal part                      |
| GO:0044431   | Golgi apparatus part                   |

**Supplementary Table 4. Genes expressed higher in males than females in the hypothalamus.**

| <b>Isogroup</b> | <b>Annotation from nr Database</b>                                                                                  |
|-----------------|---------------------------------------------------------------------------------------------------------------------|
| isogroup00069   | PREDICTED: ubiquitin associated protein 2 [Taeniopygia guttata]                                                     |
| isogroup00091   | PREDICTED: Janus kinase 2 [Taeniopygia guttata]                                                                     |
| isogroup00175   | PREDICTED: similar to Mad2 gene product [Taeniopygia guttata]                                                       |
| isogroup00187   | PREDICTED: similar to RNF170 protein [Taeniopygia guttata]                                                          |
| isogroup00224   | PREDICTED: chromosome 9 open reading frame 3 [Taeniopygia guttata]                                                  |
| isogroup00274   | putative molybdopterin synthase large subunit MOCS2B [Taeniopygia guttata]                                          |
| isogroup00276   | PREDICTED: centromere protein K [Taeniopygia guttata]                                                               |
| isogroup00365   | PREDICTED: similar to DKFZP459P083 protein isoform 1 [Taeniopygia guttata]                                          |
| isogroup00451   | PREDICTED: similar to GRAM domain containing 3 [Taeniopygia guttata]                                                |
| isogroup00458   | SWI/SNF related, matrix associated, actin dependent regulator of chromatin, subfamily a, member 2 [Gallus gallus]   |
| isogroup00524   | PREDICTED: hypothetical protein [Taeniopygia guttata]                                                               |
| isogroup00533   | DNA-directed DNA polymerase kappa [Gallus gallus]                                                                   |
| isogroup00551   | RPTOR independent companion of MTOR, complex 2 [Bos taurus]                                                         |
| isogroup00570   | single-stranded DNA binding protein 2 [Homo sapiens]                                                                |
| isogroup00600   | heterogeneous nuclear ribonucleoprotein K [Gallus gallus]                                                           |
| isogroup00663   | PREDICTED: similar to phosphoinositide-3-kinase, regulatory subunit 1 (alpha) [Taeniopygia guttata]                 |
| isogroup00685   | PREDICTED: ATP synthase, H <sup>+</sup> transporting, mitochondrial F1 complex, alpha subunit [Taeniopygia guttata] |
| isogroup00694   | PREDICTED: prolactin receptor [Taeniopygia guttata]                                                                 |
| isogroup00700   | NA                                                                                                                  |
| isogroup00744   | PREDICTED: xeroderma pigmentosum, complementation group A [Taeniopygia guttata]                                     |
| isogroup00779   | PREDICTED: SMC5 protein [Taeniopygia guttata]                                                                       |
| isogroup00783   | PREDICTED: death-associated protein kinase 1 [Taeniopygia guttata]                                                  |
| isogroup00784   | PREDICTED: similar to phosphodiesterase 1A, calmodulin-dependent [Taeniopygia guttata]                              |
| isogroup00794   | PREDICTED: similar to Lipid phosphate phosphohydrolase 1 [Taeniopygia guttata]                                      |
| isogroup00984   | PREDICTED: similar to KIAA0372 [Gallus gallus]                                                                      |
| isogroup00991   | PREDICTED: jumonji domain containing 2C [Taeniopygia guttata]                                                       |
| isogroup00999   | PREDICTED: COBW domain containing protein1 [Taeniopygia guttata]                                                    |
| isogroup01050   | PREDICTED: zinc finger, CCHC domain containing 6 [Taeniopygia guttata]                                              |
| isogroup01106   | PREDICTED: similar to SHC (Src homology 2 domain containing) transforming protein 3 [Taeniopygia guttata]           |
| isogroup01156   | PREDICTED: similar to E-type ATPase [Gallus gallus]                                                                 |
| isogroup01180   | PREDICTED: myosin, light chain kinase [Taeniopygia guttata]                                                         |



| <b>Isogroup</b> | <b>Annotation from nr Database</b>                                                                      |
|-----------------|---------------------------------------------------------------------------------------------------------|
| isogroup01181   | PREDICTED: similar to phosphoinositide-3-kinase, class 3 [Taeniopygia guttata]                          |
| isogroup01284   | PREDICTED: RAS p21 protein activator (GTPase activating protein) 1 [Taeniopygia guttata]                |
| isogroup01427   | PREDICTED: microtubule-associated protein 1B isoform 1 [Taeniopygia guttata]                            |
| isogroup01442   | PREDICTED: peptidylglycine alpha-amidating monooxygenase isoform 2 [Taeniopygia guttata]                |
| isogroup01466   | PREDICTED: similar to protein geranylgeranyltransferase type I, beta subunit isoform 1 [Equus caballus] |
| isogroup01479   | PREDICTED: similar to hook homolog 3 [Taeniopygia guttata]                                              |
| isogroup01587   | PREDICTED: G protein-coupled receptor 123 [Taeniopygia guttata]                                         |
| isogroup01601   | PREDICTED: metaxin 3 [Taeniopygia guttata]                                                              |
| isogroup01658   | Rpl17 protein [Mus musculus]                                                                            |
| isogroup01708   | PREDICTED: similar to phosphatidylinositol transfer protein, cytoplasmic 1 [Taeniopygia guttata]        |
| isogroup01750   | PREDICTED: hypothetical protein [Taeniopygia guttata]                                                   |
| isogroup01786   | ankyrin repeat domain 55 [Xenopus (Silurana) tropicalis]                                                |
| isogroup01797   | PREDICTED: similar to transcription factor IIIB 150 [Taeniopygia guttata]                               |
| isogroup01805   | SOSS complex subunit C [Gallus gallus]                                                                  |
| isogroup01811   | PREDICTED: survival of motor neuron [Taeniopygia guttata]                                               |
| isogroup01868   | PREDICTED: ankyrin repeat domain protein 15 [Gallus gallus]                                             |
| isogroup01902   | PREDICTED: NADH dehydrogenase (ubiquinone) Fe-S protein 4 [Taeniopygia guttata]                         |
| isogroup01948   | PREDICTED: ST8 alpha-N-acetyl-neuraminide alpha-2,8-sialyltransferase 5 [Taeniopygia guttata]           |
| isogroup02104   | PREDICTED: follistatin [Taeniopygia guttata]                                                            |
| isogroup02116   | PREDICTED: UDP-N-acetylglucosamine-2-epimerase/N-acetylmannosamine kinase [Taeniopygia guttata]         |
| isogroup02203   | PREDICTED: transmembrane protein 161B [Taeniopygia guttata]                                             |
| isogroup02238   | PREDICTED: similar to putative peptidylprolyl isomerase C [Taeniopygia guttata]                         |
| isogroup02253   | PREDICTED: similar to Oxidation resistance 1 [Gallus gallus]                                            |
| isogroup02286   | NA                                                                                                      |
| isogroup02293   | PREDICTED: similar to transcription factor IIIB 150 [Taeniopygia guttata]                               |
| isogroup02353   | PREDICTED: hydroxymethylglutaryl-CoA synthase 1 [Taeniopygia guttata]                                   |
| isogroup02406   | PREDICTED: similar to isochorismatase domain containing 1 [Gallus gallus]                               |
| isogroup02529   | PREDICTED: similar to FERM and PDZ domain containing 4 [Taeniopygia guttata]                            |
| isogroup02549   | NA                                                                                                      |
| isogroup02560   | unnamed protein product [Homo sapiens]                                                                  |
| isogroup02677   | mutated in colorectal cancers [Bos taurus]                                                              |

| <b>Isogroup</b> | <b>Annotation from nr Database</b>                                                                                                     |
|-----------------|----------------------------------------------------------------------------------------------------------------------------------------|
| isogroup02714   | PREDICTED: similar to LOC100170471 protein [Taeniopygia guttata]                                                                       |
| isogroup02737   | PREDICTED: hypothetical protein [Taeniopygia guttata]                                                                                  |
| isogroup02901   | PREDICTED: similar to Ras-like without CAAX 2 [Taeniopygia guttata]                                                                    |
| isogroup02948   | PREDICTED: hypothetical protein [Taeniopygia guttata]                                                                                  |
| isogroup02951   | PREDICTED: similar to RAD26L hypothetical protein [Equus caballus]                                                                     |
| isogroup02995   | PREDICTED: similar to calcium channel, voltage-dependent, alpha 2/delta subunit 1 [Taeniopygia guttata]                                |
| isogroup03065   | unnamed protein product [Homo sapiens]                                                                                                 |
| isogroup03074   | PREDICTED: multiple PDZ domain protein [Taeniopygia guttata]                                                                           |
| isogroup03097   | PREDICTED: phosphatidylinositol-4-phosphate 5-kinase, type I, beta [Taeniopygia guttata]                                               |
| isogroup03129   | PREDICTED: ring finger protein 20 [Taeniopygia guttata]                                                                                |
| isogroup03165   | PREDICTED: retinoic acid induced 14 [Taeniopygia guttata]                                                                              |
| isogroup03176   | PREDICTED: similar to polyadenylate binding protein-interacting protein 1 [Taeniopygia guttata]                                        |
| isogroup03311   | PREDICTED: importin 11 [Taeniopygia guttata]                                                                                           |
| isogroup03336   | PREDICTED: PC4 and SFRS1 interacting protein 1 [Taeniopygia guttata]                                                                   |
| isogroup03358   | PREDICTED: similar to EEF2K protein [Taeniopygia guttata]                                                                              |
| isogroup03360   | putative fructosamine-3-kinase-related protein [Taeniopygia guttata]                                                                   |
| isogroup03383   | PREDICTED: similar to UBQLN1 protein [Gallus gallus]                                                                                   |
| isogroup03392   | PREDICTED: dedicator of cytokinesis 4 [Taeniopygia guttata]                                                                            |
| isogroup03406   | PREDICTED: similar to ELAV (embryonic lethal, abnormal vision, Drosophila)-like 2 (Hu antigen B) (AKA Mel-N1), partial [Gallus gallus] |
| isogroup03424   | PREDICTED: polo-like kinase 2 (Drosophila) [Taeniopygia guttata]                                                                       |
| isogroup03475   | NA                                                                                                                                     |
| isogroup03525   | PREDICTED: fukutin [Taeniopygia guttata]                                                                                               |
| isogroup03540   | histone H2A.Z [Gallus gallus]                                                                                                          |
| isogroup03572   | PREDICTED: arrestin domain containing 3 [Taeniopygia guttata]                                                                          |
| isogroup03596   | PREDICTED: adenomatous polyposis coli [Taeniopygia guttata]                                                                            |
| isogroup03651   | PREDICTED: hypothetical protein [Gallus gallus]                                                                                        |
| isogroup03694   | PREDICTED: similar to MEK kinase 1 [Gallus gallus]                                                                                     |
| isogroup03722   | PREDICTED: very low density lipoprotein receptor [Taeniopygia guttata]                                                                 |
| isogroup03812   | NA                                                                                                                                     |
| isogroup03926   | PREDICTED: serologically defined colon cancer antigen 10 [Taeniopygia guttata]                                                         |
| isogroup03958   | SWI/SNF related, matrix associated, actin dependent regulator of chromatin, subfamily a, member 2 [Gallus gallus]                      |
| isogroup04073   | PREDICTED: similar to ribosomal protein S6 [Taeniopygia guttata]                                                                       |

| <b>Isogroup</b> | <b>Annotation from nr Database</b>                                                                     |
|-----------------|--------------------------------------------------------------------------------------------------------|
| isogroup04126   | PREDICTED: hypothetical protein [Gallus gallus]                                                        |
| isogroup04163   | PREDICTED: acetyl-coenzyme A acyltransferase 2 [Taeniopygia guttata]                                   |
| isogroup04182   | selenoprotein P precursor [Gallus gallus]                                                              |
| isogroup04199   | PREDICTED: putative clathrin light polypeptide variant 1a [Taeniopygia guttata]                        |
| isogroup04230   | PREDICTED: myosin, light chain kinase [Taeniopygia guttata]                                            |
| isogroup04250   | PREDICTED: putative sorting nexin 24 [Taeniopygia guttata]                                             |
| isogroup04273   | casein kinase 1, gamma 3, isoform CRA_c [Homo sapiens]                                                 |
| isogroup04423   | PREDICTED: similar to ubiquitin-like with PHD and ring finger domains 2, partial [Taeniopygia guttata] |
| isogroup04427   | NA                                                                                                     |
| isogroup04431   | NA                                                                                                     |
| isogroup04464   | NA                                                                                                     |
| isogroup04504   | NA                                                                                                     |
| isogroup04531   | NA                                                                                                     |
| isogroup04581   | NA                                                                                                     |
| isogroup04658   | NA                                                                                                     |
| isogroup04713   | NA                                                                                                     |
| isogroup04723   | PREDICTED: WD repeat domain 70 [Taeniopygia guttata]                                                   |
| isogroup04781   | NA                                                                                                     |
| isogroup04828   | PREDICTED: cholinergic receptor, nicotinic, beta polypeptide 3 [Taeniopygia guttata]                   |
| isogroup04886   | NA                                                                                                     |
| isogroup04896   | NA                                                                                                     |
| isogroup04966   | PREDICTED: serine palmitoyltransferase, long chain base subunit 1 [Taeniopygia guttata]                |
| isogroup04990   | PREDICTED: similar to phospholipase A2-activating protein [Taeniopygia guttata]                        |
| isogroup05006   | PREDICTED: adenylate kinase 5 [Taeniopygia guttata]                                                    |
| isogroup05017   | NA                                                                                                     |
| isogroup05031   | NA                                                                                                     |
| isogroup05085   | PREDICTED: hypothetical protein [Monodelphis domestica]                                                |
| isogroup05113   | NA                                                                                                     |
| isogroup05170   | NA                                                                                                     |
| isogroup05353   | PREDICTED: RNA U, small nuclear RNA export adaptor (phosphorylation regulated) [Taeniopygia guttata]   |
| isogroup05392   | PREDICTED: hypothetical protein [Taeniopygia guttata]                                                  |
| isogroup05427   | mitogen-activated protein kinase 1 [Gallus gallus]                                                     |
| isogroup05515   | PREDICTED: nucleoporin 155kDa [Taeniopygia guttata]                                                    |

| <b>Isogroup</b> | <b>Annotation from nr Database</b>                                                                                                  |
|-----------------|-------------------------------------------------------------------------------------------------------------------------------------|
| isogroup05531   | NA                                                                                                                                  |
| isogroup05609   | NA                                                                                                                                  |
| isogroup05708   | PREDICTED: dymeclin [Taeniopygia guttata]                                                                                           |
| isogroup05713   | PREDICTED: similar to nudix (nucleoside diphosphate linked moiety X)-type motif 12 [Taeniopygia guttata]                            |
| isogroup05773   | NA                                                                                                                                  |
| isogroup05797   | PREDICTED: multiple PDZ domain protein [Taeniopygia guttata]                                                                        |
| isogroup05834   | PREDICTED: hypothetical protein [Taeniopygia guttata]                                                                               |
| isogroup05869   | NA                                                                                                                                  |
| isogroup05913   | PREDICTED: microtubule-associated protein 1B isoform 1 [Taeniopygia guttata]                                                        |
| isogroup05914   | PREDICTED: microtubule-associated protein 1B isoform 1 [Taeniopygia guttata]                                                        |
| isogroup05915   | NA                                                                                                                                  |
| isogroup05930   | PREDICTED: KIAA0020 [Taeniopygia guttata]                                                                                           |
| isogroup06021   | PREDICTED: synuclein, alpha interacting protein (synphilin) [Taeniopygia guttata]                                                   |
| isogroup06094   | PREDICTED: myotubularin related protein 6 [Taeniopygia guttata]                                                                     |
| isogroup06113   | PREDICTED: similar to ADP-ribosylation factor-like 15 [Taeniopygia guttata]                                                         |
| isogroup06169   | PREDICTED: tudor domain containing 7 [Taeniopygia guttata]                                                                          |
| isogroup06200   | NA                                                                                                                                  |
| isogroup06263   | PREDICTED: adenomatous polyposis coli [Taeniopygia guttata]                                                                         |
| isogroup06318   | PREDICTED: RIO kinase 2 [Taeniopygia guttata]                                                                                       |
| isogroup06419   | PREDICTED: hypothetical protein [Monodelphis domestica]                                                                             |
| isogroup06434   | NA                                                                                                                                  |
| isogroup06501   | PREDICTED: microtubule-associated protein 1B isoform 2 [Taeniopygia guttata]                                                        |
| isogroup06512   | NA                                                                                                                                  |
| isogroup06549   | purpurin precursor [Gallus gallus]                                                                                                  |
| isogroup06580   | PREDICTED: erythrocyte membrane protein band 4.1 like 4A [Taeniopygia guttata]                                                      |
| isogroup06637   | PREDICTED: Dmx-like 1 [Taeniopygia guttata]                                                                                         |
| isogroup06885   | NA                                                                                                                                  |
| isogroup06899   | PREDICTED: serum response factor binding protein 1 [Taeniopygia guttata]                                                            |
| isogroup06908   | NA                                                                                                                                  |
| isogroup06935   | E3 ubiquitin-protein ligase BRE1A [Gallus gallus]                                                                                   |
| isogroup07161   | PREDICTED: similar to RING-finger protein [Taeniopygia guttata]                                                                     |
| isogroup07178   | NA                                                                                                                                  |
| isogroup07209   | PREDICTED: similar to adaptor protein, phosphotyrosine interaction, PH domain and leucine zipper containing 1 [Taeniopygia guttata] |
| isogroup07263   | PREDICTED: KIAA0368 [Taeniopygia guttata]                                                                                           |

| <b>Isogroup</b> | <b>Annotation from nr Database</b>                                                                        |
|-----------------|-----------------------------------------------------------------------------------------------------------|
| isogroup07269   | NA                                                                                                        |
| isogroup07298   | PREDICTED: family with sequence similarity 108, member B1 [Taeniopygia guttata]                           |
| isogroup07387   | NA                                                                                                        |
| isogroup07415   | NA                                                                                                        |
| isogroup07433   | NA                                                                                                        |
| isogroup07467   | PREDICTED: interferon regulatory factor 1 [Taeniopygia guttata]                                           |
| isogroup07587   | PREDICTED: leukemia inhibitory factor receptor [Taeniopygia guttata]                                      |
| isogroup07642   | NA                                                                                                        |
| isogroup07759   | NA                                                                                                        |
| isogroup07867   | PREDICTED: DEAD (Asp-Glu-Ala-Asp) box polypeptide 58 [Taeniopygia guttata]                                |
| isogroup08004   | NA                                                                                                        |
| isogroup08103   | NA                                                                                                        |
| isogroup08147   | PREDICTED: hypothetical protein [Taeniopygia guttata]                                                     |
| isogroup08222   | NA                                                                                                        |
| isogroup08231   | NA                                                                                                        |
| isogroup08266   | NA                                                                                                        |
| isogroup08325   | PREDICTED: YTH domain containing 2 [Oryctolagus cuniculus]                                                |
| isogroup08358   | PREDICTED: hypothetical protein [Taeniopygia guttata]                                                     |
| isogroup08418   | PREDICTED: similar to TBC1 domain family member 2A [Taeniopygia guttata]                                  |
| isogroup08448   | PREDICTED: IQ motif containing E [Taeniopygia guttata]                                                    |
| isogroup08490   | NA                                                                                                        |
| isogroup08621   | NA                                                                                                        |
| isogroup08691   | NA                                                                                                        |
| isogroup08834   | PREDICTED: alpha-L-iduronidase [Taeniopygia guttata]                                                      |
| isogroup08873   | NA                                                                                                        |
| isogroup08899   | NA                                                                                                        |
| isogroup08971   | NA                                                                                                        |
| isogroup09079   | NA                                                                                                        |
| isogroup09145   | PREDICTED: hypothetical protein [Taeniopygia guttata]                                                     |
| isogroup09184   | NA                                                                                                        |
| isogroup09533   | PREDICTED: similar to Frataxin, mitochondrial precursor (Friedreich ataxia protein) (Fxn) [Gallus gallus] |
| isogroup09612   | PREDICTED: similar to yeast ribosomal protein S28 homologue [Gallus gallus]                               |
| isogroup09920   | NA                                                                                                        |
| isogroup10056   | NA                                                                                                        |
| isogroup10061   | NA                                                                                                        |

| <b>Isogroup</b> | <b>Annotation from nr Database</b>                                                              |
|-----------------|-------------------------------------------------------------------------------------------------|
| isogroup10067   | PREDICTED: UDP-N-acetylglucosamine-2-epimerase/N-acetylmannosamine kinase [Taeniopygia guttata] |
| isogroup10103   | PREDICTED: hypothetical protein [Taeniopygia guttata]                                           |
| isogroup10230   | NA                                                                                              |
| isogroup10438   | PREDICTED: hypothetical protein [Taeniopygia guttata]                                           |
| isogroup10596   | NA                                                                                              |
| isogroup10663   | NA                                                                                              |
| isogroup10717   | NA                                                                                              |
| isogroup10743   | PREDICTED: patched [Taeniopygia guttata]                                                        |
| isogroup10765   | PREDICTED: similar to guanine deaminase [Taeniopygia guttata]                                   |
| isogroup10795   | PREDICTED: hypothetical protein [Taeniopygia guttata]                                           |
| isogroup10861   | PREDICTED: hypothetical protein [Taeniopygia guttata]                                           |
| isogroup10973   | NA                                                                                              |
| isogroup11007   | PREDICTED: pleckstrin and Sec7 domain containing 3 [Taeniopygia guttata]                        |
| isogroup11083   | PREDICTED: similar to hydroxysteroid dehydrogenase like 2 [Taeniopygia guttata]                 |
| isogroup11134   | NA                                                                                              |
| isogroup11150   | PREDICTED: similar to KIAA2026 [Pan troglodytes]                                                |
| isogroup11161   | PREDICTED: similar to sushi domain containing 1 [Taeniopygia guttata]                           |
| isogroup11177   | unnamed protein product [Homo sapiens]                                                          |
| isogroup11231   | PREDICTED: similar to KIAA0372 [Gallus gallus]                                                  |
| isogroup11238   | PREDICTED: protein inhibitor of activated STAT X [Taeniopygia guttata]                          |
| isogroup11418   | NA                                                                                              |
| isogroup11420   | PREDICTED: putative clathrin light polypeptide variant 1a isoform 2 [Taeniopygia guttata]       |
| isogroup11422   | PREDICTED: similar to MGC84124 protein [Taeniopygia guttata]                                    |
| isogroup11449   | PREDICTED: retinoic acid induced 14 [Taeniopygia guttata]                                       |
| isogroup11513   | PREDICTED: putative Di-Ras2 variant 2 [Taeniopygia guttata]                                     |
| isogroup11520   | PREDICTED: hypothetical protein [Taeniopygia guttata]                                           |
| isogroup11674   | PREDICTED: similar to cAMP responsive element binding protein 3-like 3 [Taeniopygia guttata]    |
| isogroup12016   | PREDICTED: dedicator of cytokinesis 4 [Taeniopygia guttata]                                     |
| isogroup12023   | NA                                                                                              |
| isogroup12033   | PREDICTED: similar to phosphodiesterase 8B [Taeniopygia guttata]                                |
| isogroup12045   | NA                                                                                              |
| isogroup12077   | thioredoxin 1 [Melopsittacus undulatus]                                                         |
| isogroup12080   | NA                                                                                              |
| isogroup12194   | PREDICTED: KIAA0258 [Taeniopygia guttata]                                                       |

| <b>Isogroup</b> | <b>Annotation from nr Database</b>                                                                                                |
|-----------------|-----------------------------------------------------------------------------------------------------------------------------------|
| isogroup12217   | NA                                                                                                                                |
| isogroup12247   | aryl hydrocarbon receptor nuclear translocator 2 [Phalacrocorax carbo]                                                            |
| isogroup12248   | PREDICTED: 3-hydroxy-3-methylglutaryl-Coenzyme A reductase [Taeniopygia guttata]                                                  |
| isogroup12256   | PREDICTED: inhibitor of kappa light polypeptide gene enhancer in B-cells, kinase complex-associated protein [Taeniopygia guttata] |
| isogroup12315   | NA                                                                                                                                |
| isogroup12327   | PREDICTED: similar to rapamycin-insensitive companion of mTOR [Taeniopygia guttata]                                               |
| isogroup12492   | WD40 repeat-containing protein SMU1 [Gallus gallus]                                                                               |
| isogroup12583   | PREDICTED: putative dynactin light chain 3 [Taeniopygia guttata]                                                                  |
| isogroup12663   | PREDICTED: similar to calmin [Taeniopygia guttata]                                                                                |
| isogroup12666   | PREDICTED: similar to chorea-acanthocytosis [Taeniopygia guttata]                                                                 |
| isogroup12744   | PREDICTED: similar to serine/threonine-protein kinase NIM1 [Taeniopygia guttata]                                                  |
| isogroup12760   | PREDICTED: WD repeat domain 36 [Taeniopygia guttata]                                                                              |
| isogroup12781   | NA                                                                                                                                |
| isogroup12809   | PREDICTED: similar to UPF0418 protein FAM164A [Taeniopygia guttata]                                                               |
| isogroup12855   | PREDICTED: similar to NDUFA12-like [Gallus gallus]                                                                                |
| isogroup12913   | PREDICTED: similar to peptidylprolyl isomerase domain and WD repeat containing 1 [Taeniopygia guttata]                            |
| isogroup12924   | NA                                                                                                                                |
| isogroup12934   | PREDICTED: fem-1 homolog c (C. elegans) [Taeniopygia guttata]                                                                     |
| isogroup12944   | NA                                                                                                                                |
| isogroup13011   | PREDICTED: RNA terminal phosphate cyclase-like 1 [Taeniopygia guttata]                                                            |
| isogroup13022   | NA                                                                                                                                |
| isogroup13078   | NA                                                                                                                                |
| isogroup13101   | PREDICTED: similar to phosphatidylinositol glycan, class G [Taeniopygia guttata]                                                  |
| isogroup13110   | NA                                                                                                                                |
| isogroup13208   | NA                                                                                                                                |
| isogroup13220   | NA                                                                                                                                |
| isogroup13242   | NA                                                                                                                                |
| isogroup13247   | NA                                                                                                                                |
| isogroup13255   | PREDICTED: similar to diacylglycerol kinase, theta [Taeniopygia guttata]                                                          |
| isogroup13260   | NA                                                                                                                                |
| isogroup13285   | PREDICTED: adenomatous polyposis coli [Taeniopygia guttata]                                                                       |
| isogroup13439   | PREDICTED: similar to guanine deaminase [Taeniopygia guttata]                                                                     |
| isogroup13498   | NA                                                                                                                                |

| <b>Isogroup</b> | <b>Annotation from nr Database</b>                                                                                                |
|-----------------|-----------------------------------------------------------------------------------------------------------------------------------|
| isogroup13499   | PREDICTED: neurolysin (metallopeptidase M3 family) [Taeniopygia guttata]                                                          |
| isogroup13712   | PREDICTED: small glutamine-rich tetratricopeptide repeat (TPR)-containing, beta [Taeniopygia guttata]                             |
| isogroup13741   | NA                                                                                                                                |
| isogroup13761   | PREDICTED: putative Adenylate kinase 3 alpha like 1 variant 1 [Taeniopygia guttata]                                               |
| isogroup13833   | NA                                                                                                                                |
| isogroup13887   | PREDICTED: superkiller viralicidic activity 2-like 2 [Taeniopygia guttata]                                                        |
| isogroup13892   | PREDICTED: fucosyltransferase 10 (alpha (1,3) fucosyltransferase) [Taeniopygia guttata]                                           |
| isogroup13911   | NA                                                                                                                                |
| isogroup14026   | PREDICTED: similar to KIAA1797 [Taeniopygia guttata]                                                                              |
| isogroup14060   | PREDICTED: gamma-aminobutyric acid (GABA) A receptor, alpha 5 [Taeniopygia guttata]                                               |
| isogroup14093   | PREDICTED: similar to Hsp90 co-chaperone Cdc37-like 1 [Taeniopygia guttata]                                                       |
| isogroup14159   | PREDICTED: ubiquitin specific peptidase 13 (isopeptidase T-3) [Taeniopygia guttata]                                               |
| isogroup14169   | PREDICTED: LMBR1 domain containing 2 [Taeniopygia guttata]                                                                        |
| isogroup14285   | PREDICTED: WD repeat domain 36 [Taeniopygia guttata]                                                                              |
| isogroup14287   | NA                                                                                                                                |
| isogroup14313   | PREDICTED: glycine dehydrogenase (decarboxylating) [Taeniopygia guttata]                                                          |
| isogroup14347   | PREDICTED: hypothetical protein [Taeniopygia guttata]                                                                             |
| isogroup14362   | NA                                                                                                                                |
| isogroup14383   | NA                                                                                                                                |
| isogroup14475   | PREDICTED: similar to 2210408I21Rik protein [Taeniopygia guttata]                                                                 |
| isogroup14499   | PREDICTED: hypothetical protein [Taeniopygia guttata]                                                                             |
| isogroup14588   | PREDICTED: hypothetical protein [Taeniopygia guttata]                                                                             |
| isogroup14640   | NA                                                                                                                                |
| isogroup14645   | NA                                                                                                                                |
| isogroup14706   | PREDICTED: inhibitor of kappa light polypeptide gene enhancer in B-cells, kinase complex-associated protein [Taeniopygia guttata] |
| isogroup14719   | PREDICTED: similar to Katanin p60 ATPase-containing subunit A-like 2 [Taeniopygia guttata]                                        |
| isogroup14749   | PREDICTED: chromosome 9 open reading frame 95 [Taeniopygia guttata]                                                               |
| isogroup14755   | PREDICTED: similar to GABA-A receptor alpha-3 subunit [Monodelphis domestica]                                                     |
| isogroup14784   | NA                                                                                                                                |
| isogroup14801   | NA                                                                                                                                |
| isogroup14823   | PREDICTED: similar to chorea-acanthocytosis [Taeniopygia guttata]                                                                 |



| <b>Isogroup</b> | <b>Annotation from nr Database</b>                                                                                                                  |
|-----------------|-----------------------------------------------------------------------------------------------------------------------------------------------------|
| isogroup14826   | NA                                                                                                                                                  |
| isogroup14880   | PREDICTED: ankyrin repeat, family A (RFXANK-like), 2 [Taeniopygia guttata]                                                                          |
| isogroup14897   | PREDICTED: cholinergic receptor, nicotinic, beta polypeptide 3 [Taeniopygia guttata]                                                                |
| isogroup14905   | PREDICTED: excision repair cross-complementing rodent repair deficiency, complementation group 8 [Taeniopygia guttata]                              |
| isogroup15123   | putative autophagy 12-like [Taeniopygia guttata]                                                                                                    |
| isogroup15166   | PREDICTED: hypothetical protein [Taeniopygia guttata]                                                                                               |
| isogroup15225   | PREDICTED: haloacid dehalogenase-like hydrolase domain containing 2 [Taeniopygia guttata]                                                           |
| isogroup15289   | PREDICTED: KIAA0368 [Taeniopygia guttata]                                                                                                           |
| isogroup15327   | NA                                                                                                                                                  |
| isogroup15339   | PREDICTED: putative TGF beta-inducible nuclear protein 1 [Taeniopygia guttata]                                                                      |
| isogroup15384   | methylcrotonoyl-Coenzyme A carboxylase 2 (beta) [Xenopus laevis]                                                                                    |
| isogroup15454   | NA                                                                                                                                                  |
| isogroup15511   | NA                                                                                                                                                  |
| isogroup15537   | NA                                                                                                                                                  |
| isogroup15564   | NA                                                                                                                                                  |
| isogroup15606   | NA                                                                                                                                                  |
| isogroup15645   | NA                                                                                                                                                  |
| isogroup15684   | PREDICTED: similar to solute carrier family 1 (neuronal/epithelial high affinity glutamate transporter, system Xag), member 1 [Taeniopygia guttata] |
| isogroup15700   | PREDICTED: similar to RING-finger protein [Taeniopygia guttata]                                                                                     |
| isogroup15718   | NA                                                                                                                                                  |
| isogroup15800   | PREDICTED: hypothetical protein [Gallus gallus]                                                                                                     |
| isogroup15822   | PREDICTED: pentatricopeptide repeat domain 2 [Taeniopygia guttata]                                                                                  |
| isogroup15855   | NA                                                                                                                                                  |
| isogroup15857   | NA                                                                                                                                                  |
| isogroup15864   | cannabinoid receptor 1 (brain) [Taeniopygia guttata]                                                                                                |
| isogroup15905   | PREDICTED: tetratricopeptide repeat domain 33 [Taeniopygia guttata]                                                                                 |
| isogroup15912   | PREDICTED: hypothetical protein [Taeniopygia guttata]                                                                                               |
| isogroup15918   | PREDICTED: corneal wound healing-related protein [Taeniopygia guttata]                                                                              |
| isogroup15928   | PREDICTED: similar to DnaJ (Hsp40) homolog, subfamily C, member 21 [Taeniopygia guttata]                                                            |
| isogroup15974   | PREDICTED: similar to probable glutathione peroxidase 8-B [Taeniopygia guttata]                                                                     |
| isogroup15978   | PREDICTED: similar to DCP2 decapping enzyme [Taeniopygia guttata]                                                                                   |
| isogroup15991   | PREDICTED: similar to Probable gluconokinase [Taeniopygia guttata]                                                                                  |

| <b>Isogroup</b> | <b>Annotation from nr Database</b>                                                                   |
|-----------------|------------------------------------------------------------------------------------------------------|
| isogroup16017   | PREDICTED: hypothetical protein [Taeniopygia guttata]                                                |
| isogroup16094   | PREDICTED: hypothetical protein [Gallus gallus]                                                      |
| isogroup16138   | NA                                                                                                   |
| isogroup16139   | PREDICTED: similar to KIAA1281 protein [Taeniopygia guttata]                                         |
| isogroup16198   | NA                                                                                                   |
| isogroup16213   | PREDICTED: corneal wound healing-related protein [Taeniopygia guttata]                               |
| isogroup16345   | hydroxysteroid (17-beta) dehydrogenase 4 [Gallus gallus]                                             |
| isogroup16360   | PREDICTED: aprataxin [Taeniopygia guttata]                                                           |
| isogroup16414   | NA                                                                                                   |
| isogroup16504   | NA                                                                                                   |
| isogroup16535   | NA                                                                                                   |
| isogroup16568   | PREDICTED: neurotrophic tyrosine kinase, receptor, type 2, partial [Taeniopygia guttata]             |
| isogroup16656   | PREDICTED: general transcription factor IIH, polypeptide 2, 44kD subunit isoform 8 [Pan troglodytes] |
| isogroup16657   | PREDICTED: farnesyltransferase, CAAX box, alpha [Taeniopygia guttata]                                |
| isogroup16723   | PREDICTED: LMBR1 domain containing 2 [Taeniopygia guttata]                                           |
| isogroup16830   | NA                                                                                                   |
| isogroup16831   | NA                                                                                                   |
| isogroup16879   | PREDICTED: similar to Small nuclear RNA activating complex, polypeptide 3 [Gallus gallus]            |
| isogroup16885   | NA                                                                                                   |
| isogroup16905   | PREDICTED: Janus kinase 2 [Taeniopygia guttata]                                                      |
| isogroup16937   | PREDICTED: inositol 1,3,4-triphosphate 5/6 kinase [Taeniopygia guttata]                              |
| isogroup16942   | PREDICTED: similar to SAC1 suppressor of actin mutations 1-like [Taeniopygia guttata]                |
| isogroup16988   | NA                                                                                                   |
| isogroup17022   | PREDICTED: protein kinase, AMP-activated, alpha 1 catalytic subunit [Taeniopygia guttata]            |
| isogroup17041   | NA                                                                                                   |
| isogroup17083   | PREDICTED: similar to AP-3 complex subunit beta-1 [Taeniopygia guttata]                              |
| isogroup17092   | PREDICTED: similar to protein tyrosine kinase fer isoform 1 [Bos taurus]                             |
| isogroup17106   | PREDICTED: similar to alpha-L-iduronidase, partial [Taeniopygia guttata]                             |
| isogroup17110   | NA                                                                                                   |
| isogroup17131   | NA                                                                                                   |
| isogroup17170   | calcineurin A alpha [Gallus gallus]                                                                  |
| isogroup17195   | PREDICTED: hypothetical protein [Taeniopygia guttata]                                                |

| <b>Isogroup</b> | <b>Annotation from nr Database</b>                                                                                                                |
|-----------------|---------------------------------------------------------------------------------------------------------------------------------------------------|
| isogroup17198   | PREDICTED: SET binding protein 1 [Taeniopygia guttata]                                                                                            |
| isogroup17210   | PREDICTED: hypothetical protein [Taeniopygia guttata]                                                                                             |
| isogroup17216   | PREDICTED: hypothetical protein [Gallus gallus]                                                                                                   |
| isogroup17243   | PREDICTED: transient receptor potential cation channel, subfamily M, member 3 [Taeniopygia guttata]                                               |
| isogroup17249   | PREDICTED: alpha-methylacyl-CoA racemase [Taeniopygia guttata]                                                                                    |
| isogroup17296   | PREDICTED: histidine acid phosphatase domain containing 1 [Taeniopygia guttata]                                                                   |
| isogroup17356   | PREDICTED: similar to ring finger protein 38 [Monodelphis domestica]                                                                              |
| isogroup17371   | NA                                                                                                                                                |
| isogroup17372   | talin 1 [Gallus gallus]                                                                                                                           |
| isogroup17573   | PREDICTED: sema domain, immunoglobulin domain (Ig), transmembrane domain (TM) and short cytoplasmic domain, (semaphorin) 4D [Taeniopygia guttata] |
| isogroup17575   | NA                                                                                                                                                |
| isogroup17604   | sorting nexin 2 [Gallus gallus]                                                                                                                   |
| isogroup17755   | NA                                                                                                                                                |
| isogroup17760   | NA                                                                                                                                                |
| isogroup17874   | PREDICTED: hypothetical protein [Taeniopygia guttata]                                                                                             |
| isogroup17888   | NA                                                                                                                                                |
| isogroup17971   | NA                                                                                                                                                |
| isogroup18001   | PREDICTED: similar to GC-rich promoter binding protein 1 isoform 2 [Taeniopygia guttata]                                                          |
| isogroup18078   | NA                                                                                                                                                |
| isogroup18135   | PREDICTED: hypothetical protein [Taeniopygia guttata]                                                                                             |
| isogroup18175   | NA                                                                                                                                                |
| isogroup18409   | NA                                                                                                                                                |
| isogroup18440   | NA                                                                                                                                                |
| isogroup18497   | putative DnaJ subfamily A member 1 variant 3 [Taeniopygia guttata]                                                                                |
| isogroup18526   | NA                                                                                                                                                |
| isogroup18645   | NA                                                                                                                                                |
| isogroup18646   | PREDICTED: G protein-coupled receptor 158 [Taeniopygia guttata]                                                                                   |
| isogroup18693   | PREDICTED: adenomatous polyposis coli [Taeniopygia guttata]                                                                                       |
| isogroup18708   | PREDICTED: similar to Hippocampus abundant transcript-like protein 1 [Taeniopygia guttata]                                                        |
| isogroup18739   | PREDICTED: hypothetical protein [Taeniopygia guttata]                                                                                             |
| isogroup18743   | PREDICTED: similar to G elongation factor, mitochondrial 2 [Taeniopygia guttata]                                                                  |
| isogroup18765   | unnamed protein product [Mus musculus]                                                                                                            |
| isogroup18777   | PREDICTED: insulin-like growth factor 1 receptor [Taeniopygia guttata]                                                                            |

| <b>Isogroup</b> | <b>Annotation from nr Database</b>                                                                                                  |
|-----------------|-------------------------------------------------------------------------------------------------------------------------------------|
| isogroup18887   | PREDICTED: similar to ring finger protein 38 [Monodelphis domestica]                                                                |
| isogroup18904   | NA                                                                                                                                  |
| isogroup19029   | PREDICTED: fer (fps/fes related) tyrosine kinase (phosphoprotein NCP94) [Taeniopygia guttata]                                       |
| isogroup19083   | PREDICTED: latrophilin 3 [Equus caballus]                                                                                           |
| isogroup19091   | PREDICTED: similar to phosphoinositide-3-kinase, regulatory subunit 1 (alpha) [Taeniopygia guttata]                                 |
| isogroup19131   | PREDICTED: similar to mutS homolog 3 [Taeniopygia guttata]                                                                          |
| isogroup19305   | NA                                                                                                                                  |
| isogroup19314   | NA                                                                                                                                  |
| isogroup19341   | PREDICTED: similar to AGTPBP1 protein [Gallus gallus]                                                                               |
| isogroup19416   | PREDICTED: neuronal protein 3.1 [Taeniopygia guttata]                                                                               |
| isogroup19560   | PREDICTED: similar to AGTPBP1 protein [Gallus gallus]                                                                               |
| isogroup19565   | NA                                                                                                                                  |
| isogroup19575   | NA                                                                                                                                  |
| isogroup19650   | NA                                                                                                                                  |
| isogroup19738   | NA                                                                                                                                  |
| isogroup19875   | PREDICTED: nuclear factor, interleukin 3 regulated [Taeniopygia guttata]                                                            |
| isogroup19912   | PREDICTED: similar to solute carrier family 4, sodium bicarbonate transporter-like, member 10 [Ornithorhynchus anatinus]            |
| isogroup19973   | PREDICTED: microtubule-associated protein 1B isoform 1 [Taeniopygia guttata]                                                        |
| isogroup20079   | PREDICTED: similar to adaptor protein, phosphotyrosine interaction, PH domain and leucine zipper containing 1 [Taeniopygia guttata] |
| isogroup20211   | PREDICTED: similar to arylsulfatase B [Taeniopygia guttata]                                                                         |
| isogroup20226   | NA                                                                                                                                  |
| isogroup20237   | PREDICTED: centrosomal protein 78kDa [Taeniopygia guttata]                                                                          |
| isogroup20295   | NA                                                                                                                                  |
| isogroup20325   | NA                                                                                                                                  |
| isogroup20328   | PREDICTED: hypothetical protein [Taeniopygia guttata]                                                                               |
| isogroup20368   | NA                                                                                                                                  |
| isogroup20463   | PREDICTED: similar to cyclin G associated kinase [Taeniopygia guttata]                                                              |
| isogroup20470   | PREDICTED: similar to DnaJ (Hsp40) homolog, subfamily C, member 21 [Taeniopygia guttata]                                            |
| isogroup20473   | PREDICTED: similar to SECIS binding protein 2 [Gallus gallus]                                                                       |
| isogroup20504   | PREDICTED: ATPase, class II, type 9B [Taeniopygia guttata]                                                                          |
| isogroup20549   | NA                                                                                                                                  |
| isogroup20555   | PREDICTED: similar to transcription factor IIIB 150 [Taeniopygia guttata]                                                           |

| <b>Isogroup</b> | <b>Annotation from nr Database</b>                                                                            |
|-----------------|---------------------------------------------------------------------------------------------------------------|
| isogroup20562   | NA                                                                                                            |
| isogroup20660   | PREDICTED: similar to megakaryoblastic leukemia 2 protein [Gallus gallus]                                     |
| isogroup20761   | PREDICTED: similar to coagulation factor II (thrombin) receptor [Taeniopygia guttata]                         |
| isogroup20772   | PREDICTED: hypothetical protein [Taeniopygia guttata]                                                         |
| isogroup20776   | PREDICTED: similar to TBC1 domain family member 2A [Taeniopygia guttata]                                      |
| isogroup20795   | PREDICTED: DEAH (Asp-Glu-Ala-His) box polypeptide 29 [Taeniopygia guttata]                                    |
| isogroup20800   | NA                                                                                                            |
| isogroup20817   | NA                                                                                                            |
| isogroup20848   | PREDICTED: similar to chorea-acanthocytosis [Taeniopygia guttata]                                             |
| isogroup20898   | NA                                                                                                            |
| isogroup20938   | NA                                                                                                            |
| isogroup20955   | NA                                                                                                            |
| isogroup20993   | PREDICTED: similar to oxytocinase splice [Gallus gallus]                                                      |
| isogroup21009   | NA                                                                                                            |
| isogroup21015   | NA                                                                                                            |
| isogroup21019   | PREDICTED: COMM domain containing 10 [Taeniopygia guttata]                                                    |
| isogroup21109   | NA                                                                                                            |
| isogroup21177   | NA                                                                                                            |
| isogroup21194   | PREDICTED: amyloid beta (A4) precursor protein-binding, family A, member 1 [Taeniopygia guttata]              |
| isogroup21279   | PREDICTED: jumonji domain containing 2C [Taeniopygia guttata]                                                 |
| isogroup21281   | PREDICTED: hypothetical protein [Taeniopygia guttata]                                                         |
| isogroup21321   | PREDICTED: similar to monogenic, audiogenic seizure susceptibility 1 homolog (mouse), [Monodelphis domestica] |
| isogroup21329   | PREDICTED: WD repeat domain 41 [Taeniopygia guttata]                                                          |
| isogroup21365   | NA                                                                                                            |
| isogroup21373   | NA                                                                                                            |
| isogroup21432   | NA                                                                                                            |
| isogroup21435   | NA                                                                                                            |
| isogroup21454   | PREDICTED: interleukin 6 signal transducer (gp130, oncostatin M receptor) [Taeniopygia guttata]               |
| isogroup21598   | NA                                                                                                            |
| isogroup21656   | PREDICTED: similar to ubiquitin-like with PHD and ring finger domains 2, partial [Taeniopygia guttata]        |
| isogroup21810   | PREDICTED: similar to Integrin alpha-2 [Taeniopygia guttata]                                                  |
| isogroup21857   | PREDICTED: similar to phosphatidylinositol glycan, class G [Taeniopygia guttata]                              |

| <b>Isogroup</b> | <b>Annotation from nr Database</b>                                                     |
|-----------------|----------------------------------------------------------------------------------------|
| isogroup21872   | NA                                                                                     |
| isogroup21886   | PREDICTED: osteoclast stimulating factor 1 [Taeniopygia guttata]                       |
| isogroup21923   | NA                                                                                     |
| isogroup21953   | NA                                                                                     |
| isogroup22026   | NA                                                                                     |
| isogroup22037   | NA                                                                                     |
| isogroup22044   | PREDICTED: hypothetical protein [Taeniopygia guttata]                                  |
| isogroup22075   | PREDICTED: similar to FCH domain only protein 2 [Taeniopygia guttata]                  |
| isogroup22087   | hypothetical protein [Taeniopygia guttata]                                             |
| isogroup22093   | PREDICTED: homer 1-like [Danio rerio]                                                  |
| isogroup22217   | NA                                                                                     |
| isogroup22242   | PREDICTED: hypothetical protein [Taeniopygia guttata]                                  |
| isogroup22262   | PREDICTED: zinc finger, CCHC domain containing 6 [Taeniopygia guttata]                 |
| isogroup22279   | NA                                                                                     |
| isogroup22354   | NA                                                                                     |
| isogroup22374   | PREDICTED: hypothetical protein [Taeniopygia guttata]                                  |
| isogroup22459   | NA                                                                                     |
| isogroup22507   | NA                                                                                     |
| isogroup22560   | PREDICTED: solute carrier family 30 (zinc transporter), member 5 [Taeniopygia guttata] |
| isogroup22576   | PREDICTED: hypothetical protein [Gallus gallus]                                        |
| isogroup22601   | PREDICTED: similar to X-ray repair cross complementing protein 4 [Taeniopygia guttata] |
| isogroup22610   | NA                                                                                     |
| isogroup22614   | PREDICTED: similar to karyopherin beta2 [Gallus gallus]                                |
| isogroup22617   | NA                                                                                     |
| isogroup22646   | NA                                                                                     |
| isogroup22667   | NA                                                                                     |
| isogroup22714   | NA                                                                                     |
| isogroup22726   | PREDICTED: multiple PDZ domain protein [Taeniopygia guttata]                           |

**Supplementary Table 5. Genes expressed higher in females than males in the hypothalamus.**

| <b>Isogroup</b> | <b>Annotation from nr Database</b>                                                                   |
|-----------------|------------------------------------------------------------------------------------------------------|
| isogroup00008   | PREDICTED: similar to UTP18, small subunit processome component [Taeniopygia guttata]                |
| isogroup00017   | PREDICTED: similar to Envelope glycoprotein [Taeniopygia guttata]                                    |
| isogroup00027   | PREDICTED: similar to coiled-coil domain containing 5 [Taeniopygia guttata]                          |
| isogroup00028   | adipocyte differentiation-related protein [Gallus gallus]                                            |
| isogroup00032   | NA                                                                                                   |
| isogroup00052   | NA                                                                                                   |
| isogroup00073   | NA                                                                                                   |
| isogroup00097   | PREDICTED: transforming, acidic coiled-coil containing protein 3 [Taeniopygia guttata]               |
| isogroup00147   | NA                                                                                                   |
| isogroup00157   | NA                                                                                                   |
| isogroup00230   | NA                                                                                                   |
| isogroup00260   | PREDICTED: similar to Gag-Pro-Pol-Env protein [Taeniopygia guttata]                                  |
| isogroup00396   | PREDICTED: similar to KIAA1892 protein - DDB1- and CUL4-associated factor 12 [Monodelphis domestica] |
| isogroup00459   | NA                                                                                                   |
| isogroup00499   | PREDICTED: hypothetical protein [Taeniopygia guttata]                                                |
| isogroup00660   | PREDICTED: similar to polyprotein [Taeniopygia guttata]                                              |
| isogroup00829   | PREDICTED: collagen, type IV, alpha 3 (Goodpasture antigen) binding protein [Taeniopygia guttata]    |
| isogroup00842   | PREDICTED: similar to Gag-Pro-Pol-Env protein [Taeniopygia guttata]                                  |
| isogroup00849   | activated RNA polymerase II transcriptional coactivator p15 [Gallus gallus]                          |
| isogroup00907   | R envelope protein [Hylobates moloch]                                                                |
| isogroup00912   | NA                                                                                                   |
| isogroup00934   | PREDICTED: ADP-ribosylation factor binding protein 3 [Taeniopygia guttata]                           |
| isogroup00993   | PREDICTED: similar to interleukin 22-binding protein [Taeniopygia guttata]                           |
| isogroup01222   | PREDICTED: similar to pol-like protein ENS-3, partial [Taeniopygia guttata]                          |
| isogroup01269   | valosin-containing protein [Gallus gallus]                                                           |
| isogroup01578   | NA                                                                                                   |
| isogroup01716   | PREDICTED: similar to potassium channel modulatory factor 1 [Taeniopygia guttata]                    |
| isogroup01746   | PREDICTED: zinc finger, SWIM-type containing 6 [Taeniopygia guttata]                                 |
| isogroup01959   | NA                                                                                                   |
| isogroup01965   | PREDICTED: similar to dual oxidase 2 [Taeniopygia guttata]                                           |
| isogroup01999   | NA                                                                                                   |
| isogroup02469   | putative protein kinase C inhibitor/ASWZ [Taeniopygia guttata]                                       |

| <b>Isogroup</b> | <b>Annotation from nr Database</b>                                                                                   |
|-----------------|----------------------------------------------------------------------------------------------------------------------|
| isogroup02618   | NA                                                                                                                   |
| isogroup02820   | PREDICTED: solute carrier family 37 (glycerol-3-phosphate transporter), member 3 [Taeniopygia guttata]               |
| isogroup02829   | PREDICTED: similar to ARKadia-like 1 isoform 2 [Taeniopygia guttata]                                                 |
| isogroup02863   | NA                                                                                                                   |
| isogroup03130   | NA                                                                                                                   |
| isogroup03190   | PREDICTED: hypothetical protein [Gallus gallus]                                                                      |
| isogroup03210   | NA                                                                                                                   |
| isogroup03917   | NA                                                                                                                   |
| isogroup04068   | NA                                                                                                                   |
| isogroup04099   | NA                                                                                                                   |
| isogroup04105   | NA                                                                                                                   |
| isogroup04159   | PREDICTED: similar to LOC496251 protein [Taeniopygia guttata]                                                        |
| isogroup04474   | NA                                                                                                                   |
| isogroup04702   | NA                                                                                                                   |
| isogroup04710   | unnamed protein product [Homo sapiens]                                                                               |
| isogroup04792   | NA                                                                                                                   |
| isogroup04876   | NA                                                                                                                   |
| isogroup05190   | PREDICTED: similar to Gag polyprotein [Taeniopygia guttata]                                                          |
| isogroup05200   | NA                                                                                                                   |
| isogroup05470   | NA                                                                                                                   |
| isogroup05650   | NA                                                                                                                   |
| isogroup05744   | PREDICTED: similar to LAG1 longevity assurance homolog 3 [Taeniopygia guttata]                                       |
| isogroup05793   | PREDICTED: similar to polyprotein [Taeniopygia guttata]                                                              |
| isogroup05969   | NA                                                                                                                   |
| isogroup06064   | NA                                                                                                                   |
| isogroup06101   | PREDICTED: similar to rCG43799 [Taeniopygia guttata]                                                                 |
| isogroup06151   | NA                                                                                                                   |
| isogroup06326   | tumor necrosis factor, alpha-induced protein 6 [Gallus gallus]                                                       |
| isogroup06400   | YK047_HUMAN RecName: Full=Putative Ig-like domain-containing protein DKFZp686O24166/DKFZp686I21167; Flags: Precursor |
| isogroup06711   | NA                                                                                                                   |
| isogroup07013   | NA                                                                                                                   |
| isogroup08046   | NA                                                                                                                   |
| isogroup08439   | PREDICTED: similar to Spermatogenesis associated 18 [Gallus gallus]                                                  |
| isogroup08540   | NA                                                                                                                   |



| <b>Isogroup</b> | <b>Annotation from nr Database</b>                                                   |
|-----------------|--------------------------------------------------------------------------------------|
| isogroup09002   | NA                                                                                   |
| isogroup09204   | NA                                                                                   |
| isogroup09440   | PREDICTED: similar to complement C1qA [Ornithorhynchus anatinus]                     |
| isogroup09442   | NA                                                                                   |
| isogroup09662   | NA                                                                                   |
| isogroup10476   | PREDICTED: similar to Bardet-Biedl syndrome 10 protein homolog [Taeniopygia guttata] |
| isogroup10572   | hypothetical protein LOC422926 [Gallus gallus]                                       |
| isogroup10667   | transcription factor BTF3 isoform 1 [Mus musculus]                                   |
| isogroup10781   | PREDICTED: similar to Gag-Pro-Pol protein [Taeniopygia guttata]                      |
| isogroup11168   | PREDICTED: similar to gag-pro-pol polyprotein [Taeniopygia guttata]                  |
| isogroup11584   | PREDICTED: hypothetical protein [Taeniopygia guttata]                                |
| isogroup11851   | NA                                                                                   |
| isogroup12363   | NA                                                                                   |
| isogroup12400   | PREDICTED: similar to polymerase [Taeniopygia guttata]                               |
| isogroup12748   | PREDICTED: proteasome alpha 4 subunit-like [Oryctolagus cuniculus]                   |
| isogroup13009   | NA                                                                                   |
| isogroup13068   | PREDICTED: similar to MEX3C [Ornithorhynchus anatinus]                               |
| isogroup13627   | NA                                                                                   |
| isogroup13767   | NA                                                                                   |
| isogroup13902   | NA                                                                                   |
| isogroup14064   | PREDICTED: similar to pol-like protein ENS-3, partial [Taeniopygia guttata]          |
| isogroup15188   | PREDICTED: similar to panopsin [Gallus gallus]                                       |
| isogroup15562   | NA                                                                                   |
| isogroup15585   | NA                                                                                   |
| isogroup15653   | PREDICTED: similar to pol protein [Ornithorhynchus anatinus]                         |
| isogroup15965   | NA                                                                                   |
| isogroup16214   | PREDICTED: similar to trans-Golgi protein GMx33 [Gallus gallus]                      |
| isogroup16708   | NA                                                                                   |
| isogroup17098   | NA                                                                                   |
| isogroup17167   | NA                                                                                   |
| isogroup17199   | POL-like [Gallus gallus]                                                             |
| isogroup17235   | NA                                                                                   |
| isogroup17762   | NA                                                                                   |
| isogroup18358   | PREDICTED: similar to zinc finger protein 31 isoform 2 [Macaca mulatta]              |
| isogroup19043   | env [Bonasa umbellus]                                                                |

| <b>Isogroup</b> | <b>Annotation from nr Database</b>                                                                  |
|-----------------|-----------------------------------------------------------------------------------------------------|
| isogroup19373   | hypothetical protein [Gallus gallus]                                                                |
| isogroup19448   | PREDICTED: similar to pol protein [Taeniopygia guttata]                                             |
| isogroup19487   | NA                                                                                                  |
| isogroup19515   | NA                                                                                                  |
| isogroup19538   | NA                                                                                                  |
| isogroup19731   | NA                                                                                                  |
| isogroup19806   | NA                                                                                                  |
| isogroup19892   | cdc48 [Larimichthys crocea]                                                                         |
| isogroup20015   | NA                                                                                                  |
| isogroup20209   | PREDICTED: hypothetical protein [Taeniopygia guttata]                                               |
| isogroup20244   | NA                                                                                                  |
| isogroup20441   | NA                                                                                                  |
| isogroup20679   | NA                                                                                                  |
| isogroup20726   | PREDICTED: similar to zinc finger protein [Taeniopygia guttata]                                     |
| isogroup20821   | NA                                                                                                  |
| isogroup21188   | NA                                                                                                  |
| isogroup21286   | NA                                                                                                  |
| isogroup21339   | PREDICTED: transmembrane channel-like 3 [Taeniopygia guttata]                                       |
| isogroup21533   | NA                                                                                                  |
| isogroup21763   | PREDICTED: similar to Gag-Pro-Pol-Env protein [Taeniopygia guttata]                                 |
| isogroup21993   | NA                                                                                                  |
| isogroup22206   | mKIAA1376 protein [Mus musculus]                                                                    |
| isogroup22561   | PREDICTED: coiled-coil domain containing 77 [Taeniopygia guttata]                                   |
| isogroup22638   | PREDICTED: transient receptor potential cation channel, subfamily M, member 8 [Taeniopygia guttata] |
| contig90110     | NA                                                                                                  |
| contig90185     | NA                                                                                                  |
| contig90192     | NA                                                                                                  |

**Supplementary Table 6. Gene Ontology terms over-represented among genes significantly differentially expressed between males and females in the hypothalamus.**

| <b>GO ID</b> | <b>GO Description</b>                                                 |
|--------------|-----------------------------------------------------------------------|
| GO:0000060   | protein import into nucleus, translocation                            |
| GO:0000079   | regulation of cyclin-dependent protein kinase activity                |
| GO:0001649   | osteoblast differentiation                                            |
| GO:0002376   | immune system process                                                 |
| GO:0003002   | regionalization                                                       |
| GO:0006665   | sphingolipid metabolic process                                        |
| GO:0006793   | phosphorus metabolic process                                          |
| GO:0006892   | post-Golgi vesicle-mediated transport                                 |
| GO:0006916   | anti-apoptosis                                                        |
| GO:0007019   | microtubule depolymerization                                          |
| GO:0007033   | vacuole organization                                                  |
| GO:0007043   | cell-cell junction assembly                                           |
| GO:0007166   | cell surface receptor signaling pathway                               |
| GO:0008154   | actin polymerization or depolymerization                              |
| GO:0008283   | cell proliferation                                                    |
| GO:0009259   | ribonucleotide metabolic process                                      |
| GO:0009636   | response to toxin                                                     |
| GO:0009896   | positive regulation of catabolic process                              |
| GO:0009968   | negative regulation of signal transduction                            |
| GO:0010243   | response to organic nitrogen                                          |
| GO:0010740   | positive regulation of intracellular protein kinase cascade           |
| GO:0010827   | regulation of glucose transport                                       |
| GO:0016125   | sterol metabolic process                                              |
| GO:0019395   | fatty acid oxidation                                                  |
| GO:0030073   | insulin secretion                                                     |
| GO:0030307   | positive regulation of cell growth                                    |
| GO:0031103   | axon regeneration                                                     |
| GO:0031112   | positive regulation of microtubule polymerization or depolymerization |
| GO:0031269   | pseudopodium assembly                                                 |
| GO:0031929   | TOR signaling cascade                                                 |
| GO:0032611   | interleukin-1 beta production                                         |
| GO:0033205   | cell cycle cytokinesis                                                |
| GO:0033273   | response to vitamin                                                   |
| GO:0033554   | cellular response to stress                                           |

| <b>GO ID</b> | <b>GO Description</b>                                            |
|--------------|------------------------------------------------------------------|
| GO:0042503   | tyrosine phosphorylation of Stat3 protein                        |
| GO:0043627   | response to estrogen stimulus                                    |
| GO:0045841   | negative regulation of mitotic metaphase/anaphase transition     |
| GO:0048871   | multicellular organismal homeostasis                             |
| GO:0051093   | negative regulation of developmental process                     |
| GO:0051313   | attachment of spindle microtubules to chromosome                 |
| GO:0051914   | positive regulation of synaptic plasticity by chemical substance |
| GO:0070507   | regulation of microtubule cytoskeleton organization              |
| GO:0004713   | protein tyrosine kinase activity                                 |
| GO:0004896   | cytokine receptor activity                                       |
| GO:0005057   | receptor signaling protein activity                              |
| GO:0005126   | cytokine receptor binding                                        |
| GO:0008289   | lipid binding                                                    |
| GO:0015631   | tubulin binding                                                  |
| GO:0016772   | transferase activity, transferring phosphorus-containing groups  |
| GO:0016854   | racemase and epimerase activity                                  |
| GO:0017046   | peptide hormone binding                                          |
| GO:0019207   | kinase regulator activity                                        |
| GO:0019900   | kinase binding                                                   |
| GO:0019902   | phosphatase binding                                              |
| GO:0050839   | cell adhesion molecule binding                                   |
| GO:0000775   | chromosome, centromeric region                                   |
| GO:0030424   | axon                                                             |
| GO:0030427   | site of polarized growth                                         |
| GO:0043025   | neuronal cell body                                               |
| GO:0043296   | apical junction complex                                          |

**Supplementary Table 7. Genes expressed higher in males than females in both medial amygdala and hypothalamus.**

| <b>Isogroup</b> | <b>Annotation from nr Database</b>                                                                                |
|-----------------|-------------------------------------------------------------------------------------------------------------------|
| isogroup00224   | PREDICTED: chromosome 9 open reading frame 3 [Taeniopygia guttata]                                                |
| isogroup00365   | PREDICTED: similar to DKFZP459P083 protein isoform 1 [Taeniopygia guttata]                                        |
| isogroup00451   | PREDICTED: similar to GRAM domain containing 3 [Taeniopygia guttata]                                              |
| isogroup00458   | SWI/SNF related, matrix associated, actin dependent regulator of chromatin, subfamily a, member 2 [Gallus gallus] |
| isogroup00524   | PREDICTED: hypothetical protein [Taeniopygia guttata]                                                             |
| isogroup00533   | DNA-directed DNA polymerase kappa [Gallus gallus]                                                                 |
| isogroup00551   | RPTOR independent companion of MTOR, complex 2 [Bos taurus]                                                       |
| isogroup00570   | single-stranded DNA binding protein 2 [Homo sapiens]                                                              |
| isogroup00694   | PREDICTED: prolactin receptor [Taeniopygia guttata]                                                               |
| isogroup00744   | PREDICTED: xeroderma pigmentosum, complementation group A [Taeniopygia guttata]                                   |
| isogroup00779   | PREDICTED: SMC5 protein [Taeniopygia guttata]                                                                     |
| isogroup00783   | PREDICTED: death-associated protein kinase 1 [Taeniopygia guttata]                                                |
| isogroup00794   | PREDICTED: similar to Lipid phosphate phosphohydrolase 1 [Taeniopygia guttata]                                    |
| isogroup00984   | PREDICTED: similar to KIAA0372 [Gallus gallus]                                                                    |
| isogroup00991   | PREDICTED: jumonji domain containing 2C [Taeniopygia guttata]                                                     |
| isogroup00999   | PREDICTED: COBW domain containing protein1 [Taeniopygia guttata]                                                  |
| isogroup01050   | PREDICTED: zinc finger, CCHC domain containing 6 [Taeniopygia guttata]                                            |
| isogroup01106   | PREDICTED: similar to SHC (Src homology 2 domain containing) transforming protein 3 [Taeniopygia guttata]         |
| isogroup01181   | PREDICTED: similar to phosphoinositide-3-kinase, class 3 [Taeniopygia guttata]                                    |
| isogroup01284   | PREDICTED: RAS p21 protein activator (GTPase activating protein) 1 [Taeniopygia guttata]                          |
| isogroup01427   | PREDICTED: microtubule-associated protein 1B isoform 1 [Taeniopygia guttata]                                      |
| isogroup01466   | PREDICTED: similar to protein geranylgeranyltransferase type I, beta subunit isoform 1 [Equus caballus]           |
| isogroup01658   | Rpl17 protein [Mus musculus]                                                                                      |
| isogroup01805   | SOSS complex subunit C [Gallus gallus]                                                                            |
| isogroup01811   | PREDICTED: survival of motor neuron [Taeniopygia guttata]                                                         |
| isogroup01868   | PREDICTED: ankyrin repeat domain protein 15 [Gallus gallus]                                                       |
| isogroup01902   | PREDICTED: NADH dehydrogenase (ubiquinone) Fe-S protein 4 [Taeniopygia guttata]                                   |
| isogroup01948   | PREDICTED: ST8 alpha-N-acetyl-neuraminide alpha-2,8-sialyltransferase 5 [Taeniopygia guttata]                     |
| isogroup02203   | PREDICTED: transmembrane protein 161B [Taeniopygia guttata]                                                       |
| isogroup02238   | PREDICTED: similar to putative peptidylprolyl isomerase C [Taeniopygia guttata]                                   |

| <b>Isogroup</b> | <b>Annotation from nr Database</b>                                                                                                     |
|-----------------|----------------------------------------------------------------------------------------------------------------------------------------|
| isogroup02286   | NA                                                                                                                                     |
| isogroup02549   | NA                                                                                                                                     |
| isogroup02560   | unnamed protein product [Homo sapiens]                                                                                                 |
| isogroup02714   | PREDICTED: similar to LOC100170471 protein [Taeniopygia guttata]                                                                       |
| isogroup02948   | PREDICTED: hypothetical protein [Taeniopygia guttata]                                                                                  |
| isogroup02951   | PREDICTED: similar to RAD26L hypothetical protein [Equus caballus]                                                                     |
| isogroup03074   | PREDICTED: multiple PDZ domain protein [Taeniopygia guttata]                                                                           |
| isogroup03097   | PREDICTED: phosphatidylinositol-4-phosphate 5-kinase, type I, beta [Taeniopygia guttata]                                               |
| isogroup03129   | PREDICTED: ring finger protein 20 [Taeniopygia guttata]                                                                                |
| isogroup03176   | PREDICTED: similar to polyadenylate binding protein-interacting protein 1 [Taeniopygia guttata]                                        |
| isogroup03336   | PREDICTED: PC4 and SFRS1 interacting protein 1 [Taeniopygia guttata]                                                                   |
| isogroup03383   | PREDICTED: similar to UBQLN1 protein [Gallus gallus]                                                                                   |
| isogroup03406   | PREDICTED: similar to ELAV (embryonic lethal, abnormal vision, Drosophila)-like 2 (Hu antigen B) (AKA Mel-N1), partial [Gallus gallus] |
| isogroup03572   | PREDICTED: arrestin domain containing 3 [Taeniopygia guttata]                                                                          |
| isogroup03596   | PREDICTED: adenomatous polyposis coli [Taeniopygia guttata]                                                                            |
| isogroup03651   | PREDICTED: hypothetical protein [Gallus gallus]                                                                                        |
| isogroup03694   | PREDICTED: similar to MEK kinase 1 [Gallus gallus]                                                                                     |
| isogroup03812   | NA                                                                                                                                     |
| isogroup03958   | SWI/SNF related, matrix associated, actin dependent regulator of chromatin, subfamily a, member 2 [Gallus gallus]                      |
| isogroup04163   | PREDICTED: acetyl-coenzyme A acyltransferase 2 [Taeniopygia guttata]                                                                   |
| isogroup04199   | PREDICTED: putative clathrin light polypeptide variant 1a [Taeniopygia guttata]                                                        |
| isogroup04250   | PREDICTED: putative sorting nexin 24 [Taeniopygia guttata]                                                                             |
| isogroup04504   | NA                                                                                                                                     |
| isogroup04531   | NA                                                                                                                                     |
| isogroup04581   | NA                                                                                                                                     |
| isogroup04723   | PREDICTED: WD repeat domain 70 [Taeniopygia guttata]                                                                                   |
| isogroup04781   | NA                                                                                                                                     |
| isogroup04828   | PREDICTED: cholinergic receptor, nicotinic, beta polypeptide 3 [Taeniopygia guttata]                                                   |
| isogroup04886   | NA                                                                                                                                     |
| isogroup04966   | PREDICTED: serine palmitoyltransferase, long chain base subunit 1 [Taeniopygia guttata]                                                |
| isogroup04990   | PREDICTED: similar to phospholipase A2-activating protein [Taeniopygia guttata]                                                        |
| isogroup05085   | PREDICTED: hypothetical protein [Monodelphis domestica]                                                                                |

| <b>Isogroup</b> | <b>Annotation from nr Database</b>                                                                       |
|-----------------|----------------------------------------------------------------------------------------------------------|
| isogroup05113   | NA                                                                                                       |
| isogroup05531   | NA                                                                                                       |
| isogroup05713   | PREDICTED: similar to nudix (nucleoside diphosphate linked moiety X)-type motif 12 [Taeniopygia guttata] |
| isogroup05797   | PREDICTED: multiple PDZ domain protein [Taeniopygia guttata]                                             |
| isogroup05913   | PREDICTED: microtubule-associated protein 1B isoform 1 [Taeniopygia guttata]                             |
| isogroup05914   | PREDICTED: microtubule-associated protein 1B isoform 1 [Taeniopygia guttata]                             |
| isogroup05930   | PREDICTED: KIAA0020 [Taeniopygia guttata]                                                                |
| isogroup06021   | PREDICTED: synuclein, alpha interacting protein (synphilin) [Taeniopygia guttata]                        |
| isogroup06263   | PREDICTED: adenomatous polyposis coli [Taeniopygia guttata]                                              |
| isogroup06318   | PREDICTED: RIO kinase 2 [Taeniopygia guttata]                                                            |
| isogroup06501   | PREDICTED: microtubule-associated protein 1B isoform 2 [Taeniopygia guttata]                             |
| isogroup06512   | NA                                                                                                       |
| isogroup06899   | PREDICTED: serum response factor binding protein 1 [Taeniopygia guttata]                                 |
| isogroup06935   | E3 ubiquitin-protein ligase BRE1A [Gallus gallus]                                                        |
| isogroup07161   | PREDICTED: similar to RING-finger protein [Taeniopygia guttata]                                          |
| isogroup07178   | NA                                                                                                       |
| isogroup07263   | PREDICTED: KIAA0368 [Taeniopygia guttata]                                                                |
| isogroup07269   | NA                                                                                                       |
| isogroup07298   | PREDICTED: family with sequence similarity 108, member B1 [Taeniopygia guttata]                          |
| isogroup07387   | NA                                                                                                       |
| isogroup07587   | PREDICTED: leukemia inhibitory factor receptor [Taeniopygia guttata]                                     |
| isogroup07867   | PREDICTED: DEAD (Asp-Glu-Ala-Asp) box polypeptide 58 [Taeniopygia guttata]                               |
| isogroup08103   | NA                                                                                                       |
| isogroup08222   | NA                                                                                                       |
| isogroup08266   | NA                                                                                                       |
| isogroup08325   | PREDICTED: YTH domain containing 2 [Oryctolagus cuniculus]                                               |
| isogroup08418   | PREDICTED: similar to TBC1 domain family member 2A [Taeniopygia guttata]                                 |
| isogroup08448   | PREDICTED: IQ motif containing E [Taeniopygia guttata]                                                   |
| isogroup08490   | NA                                                                                                       |
| isogroup08621   | NA                                                                                                       |
| isogroup08834   | PREDICTED: alpha-L-iduronidase [Taeniopygia guttata]                                                     |
| isogroup08873   | NA                                                                                                       |
| isogroup08899   | NA                                                                                                       |
| isogroup08971   | NA                                                                                                       |
| isogroup09612   | PREDICTED: similar to yeast ribosomal protein S28 homologue [Gallus gallus]                              |

| <b>isogroup</b> | <b>Annotation from nr Database</b>                                                                                                |
|-----------------|-----------------------------------------------------------------------------------------------------------------------------------|
| isogroup09920   | NA                                                                                                                                |
| isogroup10103   | PREDICTED: hypothetical protein [Taeniopygia guttata]                                                                             |
| isogroup10438   | PREDICTED: hypothetical protein [Taeniopygia guttata]                                                                             |
| isogroup10596   | NA                                                                                                                                |
| isogroup10717   | NA                                                                                                                                |
| isogroup10743   | PREDICTED: patched [Taeniopygia guttata]                                                                                          |
| isogroup11007   | PREDICTED: pleckstrin and Sec7 domain containing 3 [Taeniopygia guttata]                                                          |
| isogroup11083   | PREDICTED: similar to hydroxysteroid dehydrogenase like 2 [Taeniopygia guttata]                                                   |
| isogroup11134   | NA                                                                                                                                |
| isogroup11150   | PREDICTED: similar to KIAA2026 [Pan troglodytes]                                                                                  |
| isogroup11177   | unnamed protein product [Homo sapiens]                                                                                            |
| isogroup11231   | PREDICTED: similar to KIAA0372 [Gallus gallus]                                                                                    |
| isogroup11238   | PREDICTED: protein inhibitor of activated STAT X [Taeniopygia guttata]                                                            |
| isogroup11420   | PREDICTED: putative clathrin light polypeptide variant 1a isoform 2 [Taeniopygia guttata]                                         |
| isogroup11520   | PREDICTED: hypothetical protein [Taeniopygia guttata]                                                                             |
| isogroup11674   | PREDICTED: similar to cAMP responsive element binding protein 3-like 3 [Taeniopygia guttata]                                      |
| isogroup12023   | NA                                                                                                                                |
| isogroup12033   | PREDICTED: similar to phosphodiesterase 8B [Taeniopygia guttata]                                                                  |
| isogroup12077   | thioredoxin 1 [Melopsittacus undulatus]                                                                                           |
| isogroup12194   | PREDICTED: KIAA0258 [Taeniopygia guttata]                                                                                         |
| isogroup12217   | NA                                                                                                                                |
| isogroup12256   | PREDICTED: inhibitor of kappa light polypeptide gene enhancer in B-cells, kinase complex-associated protein [Taeniopygia guttata] |
| isogroup12315   | NA                                                                                                                                |
| isogroup12327   | PREDICTED: similar to rapamycin-insensitive companion of mTOR [Taeniopygia guttata]                                               |
| isogroup12583   | PREDICTED: putative dynactin light chain 3 [Taeniopygia guttata]                                                                  |
| isogroup12666   | PREDICTED: similar to chorea-acanthocytosis [Taeniopygia guttata]                                                                 |
| isogroup12760   | PREDICTED: WD repeat domain 36 [Taeniopygia guttata]                                                                              |
| isogroup12855   | PREDICTED: similar to NDUFA12-like [Gallus gallus]                                                                                |
| isogroup12913   | PREDICTED: similar to peptidylprolyl isomerase domain and WD repeat containing 1 [Taeniopygia guttata]                            |
| isogroup12934   | PREDICTED: fem-1 homolog c (C. elegans) [Taeniopygia guttata]                                                                     |
| isogroup13022   | NA                                                                                                                                |
| isogroup13101   | PREDICTED: similar to phosphatidylinositol glycan, class G [Taeniopygia guttata]                                                  |



| <b>Isogroup</b> | <b>Annotation from nr Database</b>                                                                                                |
|-----------------|-----------------------------------------------------------------------------------------------------------------------------------|
| isogroup13110   | NA                                                                                                                                |
| isogroup13220   | NA                                                                                                                                |
| isogroup13247   | NA                                                                                                                                |
| isogroup13255   | PREDICTED: similar to diacylglycerol kinase, theta [Taeniopygia guttata]                                                          |
| isogroup13285   | PREDICTED: adenomatous polyposis coli [Taeniopygia guttata]                                                                       |
| isogroup13499   | PREDICTED: neurolysin (metallopeptidase M3 family) [Taeniopygia guttata]                                                          |
| isogroup13712   | PREDICTED: small glutamine-rich tetratricopeptide repeat (TPR)-containing, beta [Taeniopygia guttata]                             |
| isogroup13741   | NA                                                                                                                                |
| isogroup13761   | PREDICTED: putative Adenylate kinase 3 alpha like 1 variant 1 [Taeniopygia guttata]                                               |
| isogroup13887   | PREDICTED: superkiller viralicidic activity 2-like 2 [Taeniopygia guttata]                                                        |
| isogroup13892   | PREDICTED: fucosyltransferase 10 (alpha (1,3) fucosyltransferase) [Taeniopygia guttata]                                           |
| isogroup13911   | NA                                                                                                                                |
| isogroup14285   | PREDICTED: WD repeat domain 36 [Taeniopygia guttata]                                                                              |
| isogroup14475   | PREDICTED: similar to 2210408I21Rik protein [Taeniopygia guttata]                                                                 |
| isogroup14499   | PREDICTED: hypothetical protein [Taeniopygia guttata]                                                                             |
| isogroup14706   | PREDICTED: inhibitor of kappa light polypeptide gene enhancer in B-cells, kinase complex-associated protein [Taeniopygia guttata] |
| isogroup14719   | PREDICTED: similar to Katanin p60 ATPase-containing subunit A-like 2 [Taeniopygia guttata]                                        |
| isogroup14749   | PREDICTED: chromosome 9 open reading frame 95 [Taeniopygia guttata]                                                               |
| isogroup14784   | NA                                                                                                                                |
| isogroup14801   | NA                                                                                                                                |
| isogroup14823   | PREDICTED: similar to chorea-acanthocytosis [Taeniopygia guttata]                                                                 |
| isogroup14880   | PREDICTED: ankyrin repeat, family A (RFXANK-like), 2 [Taeniopygia guttata]                                                        |
| isogroup14905   | PREDICTED: excision repair cross-complementing rodent repair deficiency, complementation group 8 [Taeniopygia guttata]            |
| isogroup15123   | putative autophagy 12-like [Taeniopygia guttata]                                                                                  |
| isogroup15166   | PREDICTED: hypothetical protein [Taeniopygia guttata]                                                                             |
| isogroup15225   | PREDICTED: haloacid dehalogenase-like hydrolase domain containing 2 [Taeniopygia guttata]                                         |
| isogroup15289   | PREDICTED: KIAA0368 [Taeniopygia guttata]                                                                                         |
| isogroup15384   | methylcrotonoyl-Coenzyme A carboxylase 2 (beta) [Xenopus laevis]                                                                  |
| isogroup15511   | NA                                                                                                                                |
| isogroup15537   | NA                                                                                                                                |
| isogroup15645   | NA                                                                                                                                |
| isogroup15684   | PREDICTED: similar to solute carrier family 1 (neuronal/epithelial high affinity                                                  |

| <b>Isogroup</b> | <b>Annotation from nr Database</b>                                                                   |
|-----------------|------------------------------------------------------------------------------------------------------|
|                 | glutamate transporter, system Xag), member 1 [Taeniopygia guttata]                                   |
| isogroup15700   | PREDICTED: similar to RING-finger protein [Taeniopygia guttata]                                      |
| isogroup15718   | NA                                                                                                   |
| isogroup15800   | PREDICTED: hypothetical protein [Gallus gallus]                                                      |
| isogroup15822   | PREDICTED: pentatricopeptide repeat domain 2 [Taeniopygia guttata]                                   |
| isogroup15855   | NA                                                                                                   |
| isogroup15857   | NA                                                                                                   |
| isogroup15905   | PREDICTED: tetratricopeptide repeat domain 33 [Taeniopygia guttata]                                  |
| isogroup15918   | PREDICTED: corneal wound healing-related protein [Taeniopygia guttata]                               |
| isogroup15928   | PREDICTED: similar to DnaJ (Hsp40) homolog, subfamily C, member 21 [Taeniopygia guttata]             |
| isogroup16017   | PREDICTED: hypothetical protein [Taeniopygia guttata]                                                |
| isogroup16139   | PREDICTED: similar to KIAA1281 protein [Taeniopygia guttata]                                         |
| isogroup16198   | NA                                                                                                   |
| isogroup16213   | PREDICTED: corneal wound healing-related protein [Taeniopygia guttata]                               |
| isogroup16345   | hydroxysteroid (17-beta) dehydrogenase 4 [Gallus gallus]                                             |
| isogroup16360   | PREDICTED: aprataxin [Taeniopygia guttata]                                                           |
| isogroup16535   | NA                                                                                                   |
| isogroup16568   | PREDICTED: neurotrophic tyrosine kinase, receptor, type 2, partial [Taeniopygia guttata]             |
| isogroup16656   | PREDICTED: general transcription factor IIH, polypeptide 2, 44kD subunit isoform 8 [Pan troglodytes] |
| isogroup16723   | PREDICTED: LMBR1 domain containing 2 [Taeniopygia guttata]                                           |
| isogroup16831   | NA                                                                                                   |
| isogroup16879   | PREDICTED: similar to Small nuclear RNA activating complex, polypeptide 3 [Gallus gallus]            |
| isogroup16885   | NA                                                                                                   |
| isogroup16937   | PREDICTED: inositol 1,3,4-triphosphate 5/6 kinase [Taeniopygia guttata]                              |
| isogroup17083   | PREDICTED: similar to AP-3 complex subunit beta-1 [Taeniopygia guttata]                              |
| isogroup17092   | PREDICTED: similar to protein tyrosine kinase fer isoform 1 [Bos taurus]                             |
| isogroup17106   | PREDICTED: similar to alpha-L-iduronidase, partial [Taeniopygia guttata]                             |
| isogroup17110   | NA                                                                                                   |
| isogroup17131   | NA                                                                                                   |
| isogroup17195   | PREDICTED: hypothetical protein [Taeniopygia guttata]                                                |
| isogroup17198   | PREDICTED: SET binding protein 1 [Taeniopygia guttata]                                               |
| isogroup17210   | PREDICTED: hypothetical protein [Taeniopygia guttata]                                                |
| isogroup17243   | PREDICTED: transient receptor potential cation channel, subfamily M, member 3                        |

| <b>Isogroup</b> | <b>Annotation from nr Database</b>                                                                                                                |
|-----------------|---------------------------------------------------------------------------------------------------------------------------------------------------|
|                 | [Taeniopygia guttata]                                                                                                                             |
| isogroup17296   | PREDICTED: histidine acid phosphatase domain containing 1 [Taeniopygia guttata]                                                                   |
| isogroup17356   | PREDICTED: similar to ring finger protein 38 [Monodelphis domestica]                                                                              |
| isogroup17372   | talin 1 [Gallus gallus]                                                                                                                           |
| isogroup17573   | PREDICTED: sema domain, immunoglobulin domain (Ig), transmembrane domain (TM) and short cytoplasmic domain, (semaphorin) 4D [Taeniopygia guttata] |
| isogroup17604   | sorting nexin 2 [Gallus gallus]                                                                                                                   |
| isogroup17874   | PREDICTED: hypothetical protein [Taeniopygia guttata]                                                                                             |
| isogroup17888   | NA                                                                                                                                                |
| isogroup17971   | NA                                                                                                                                                |
| isogroup18135   | PREDICTED: hypothetical protein [Taeniopygia guttata]                                                                                             |
| isogroup18497   | putative DnaJ subfamily A member 1 variant 3 [Taeniopygia guttata]                                                                                |
| isogroup18645   | NA                                                                                                                                                |
| isogroup18708   | PREDICTED: similar to Hippocampus abundant transcript-like protein 1 [Taeniopygia guttata]                                                        |
| isogroup18739   | PREDICTED: hypothetical protein [Taeniopygia guttata]                                                                                             |
| isogroup18743   | PREDICTED: similar to G elongation factor, mitochondrial 2 [Taeniopygia guttata]                                                                  |
| isogroup18777   | PREDICTED: insulin-like growth factor 1 receptor [Taeniopygia guttata]                                                                            |
| isogroup18887   | PREDICTED: similar to ring finger protein 38 [Monodelphis domestica]                                                                              |
| isogroup18904   | NA                                                                                                                                                |
| isogroup19029   | PREDICTED: fer (fps/fes related) tyrosine kinase (phosphoprotein NCP94) [Taeniopygia guttata]                                                     |
| isogroup19416   | PREDICTED: neuronal protein 3.1 [Taeniopygia guttata]                                                                                             |
| isogroup19565   | NA                                                                                                                                                |
| isogroup19575   | NA                                                                                                                                                |
| isogroup19650   | NA                                                                                                                                                |
| isogroup20211   | PREDICTED: similar to arylsulfatase B [Taeniopygia guttata]                                                                                       |
| isogroup20237   | PREDICTED: centrosomal protein 78kDa [Taeniopygia guttata]                                                                                        |
| isogroup20295   | NA                                                                                                                                                |
| isogroup20328   | PREDICTED: hypothetical protein [Taeniopygia guttata]                                                                                             |
| isogroup20463   | PREDICTED: similar to cyclin G associated kinase [Taeniopygia guttata]                                                                            |
| isogroup20470   | PREDICTED: similar to DnaJ (Hsp40) homolog, subfamily C, member 21 [Taeniopygia guttata]                                                          |
| isogroup20549   | NA                                                                                                                                                |
| isogroup20555   | PREDICTED: similar to transcription factor IIIB 150 [Taeniopygia guttata]                                                                         |
| isogroup20562   | NA                                                                                                                                                |
| isogroup20772   | PREDICTED: hypothetical protein [Taeniopygia guttata]                                                                                             |

| <b>Isogroup</b> | <b>Annotation from nr Database</b>                                                                            |
|-----------------|---------------------------------------------------------------------------------------------------------------|
| isogroup20776   | PREDICTED: similar to TBC1 domain family member 2A [Taeniopygia guttata]                                      |
| isogroup20800   | NA                                                                                                            |
| isogroup20938   | NA                                                                                                            |
| isogroup20993   | PREDICTED: similar to oxytocinase splice [Gallus gallus]                                                      |
| isogroup21015   | NA                                                                                                            |
| isogroup21194   | PREDICTED: amyloid beta (A4) precursor protein-binding, family A, member 1 [Taeniopygia guttata]              |
| isogroup21279   | PREDICTED: jumonji domain containing 2C [Taeniopygia guttata]                                                 |
| isogroup21281   | PREDICTED: hypothetical protein [Taeniopygia guttata]                                                         |
| isogroup21321   | PREDICTED: similar to monogenic, audiogenic seizure susceptibility 1 homolog (mouse), [Monodelphis domestica] |
| isogroup21329   | PREDICTED: WD repeat domain 41 [Taeniopygia guttata]                                                          |
| isogroup21454   | PREDICTED: interleukin 6 signal transducer (gp130, oncostatin M receptor) [Taeniopygia guttata]               |
| isogroup21656   | PREDICTED: similar to ubiquitin-like with PHD and ring finger domains 2, partial [Taeniopygia guttata]        |
| isogroup21857   | PREDICTED: similar to phosphatidylinositol glycan, class G [Taeniopygia guttata]                              |
| isogroup21886   | PREDICTED: osteoclast stimulating factor 1 [Taeniopygia guttata]                                              |
| isogroup21953   | NA                                                                                                            |
| isogroup22026   | NA                                                                                                            |
| isogroup22037   | NA                                                                                                            |
| isogroup22044   | PREDICTED: hypothetical protein [Taeniopygia guttata]                                                         |
| isogroup22075   | PREDICTED: similar to FCH domain only protein 2 [Taeniopygia guttata]                                         |
| isogroup22087   | hypothetical protein [Taeniopygia guttata]                                                                    |
| isogroup22217   | NA                                                                                                            |
| isogroup22262   | PREDICTED: zinc finger, CCHC domain containing 6 [Taeniopygia guttata]                                        |
| isogroup22507   | NA                                                                                                            |
| isogroup22576   | PREDICTED: hypothetical protein [Gallus gallus]                                                               |
| isogroup22601   | PREDICTED: similar to X-ray repair cross complementing protein 4 [Taeniopygia guttata]                        |
| isogroup22667   | NA                                                                                                            |
| isogroup22714   | NA                                                                                                            |
| isogroup22726   | PREDICTED: multiple PDZ domain protein [Taeniopygia guttata]                                                  |

**Supplementary Table 8. Genes expressed higher in females than males in both medial amygdala and hypothalamus.**

| Isogroup      | Annotation from nr Database                                                                          |
|---------------|------------------------------------------------------------------------------------------------------|
| isogroup00008 | PREDICTED: similar to UTP18, small subunit processome component [Taeniopygia guttata]                |
| isogroup00027 | PREDICTED: similar to coiled-coil domain containing 5 [Taeniopygia guttata]                          |
| isogroup00028 | adipocyte differentiation-related protein [Gallus gallus]                                            |
| isogroup00032 | NA                                                                                                   |
| isogroup00052 | NA                                                                                                   |
| isogroup00073 | NA                                                                                                   |
| isogroup00097 | PREDICTED: transforming, acidic coiled-coil containing protein 3 [Taeniopygia guttata]               |
| isogroup00147 | NA                                                                                                   |
| isogroup00230 | NA                                                                                                   |
| isogroup00260 | PREDICTED: similar to Gag-Pro-Pol-Env protein [Taeniopygia guttata]                                  |
| isogroup00396 | PREDICTED: similar to KIAA1892 protein - DDB1- and CUL4-associated factor 12 [Monodelphis domestica] |
| isogroup00459 | NA                                                                                                   |
| isogroup00499 | PREDICTED: hypothetical protein [Taeniopygia guttata]                                                |
| isogroup00660 | PREDICTED: similar to polyprotein [Taeniopygia guttata]                                              |
| isogroup00829 | PREDICTED: collagen, type IV, alpha 3 (Goodpasture antigen) binding protein [Taeniopygia guttata]    |
| isogroup00842 | PREDICTED: similar to Gag-Pro-Pol-Env protein [Taeniopygia guttata]                                  |
| isogroup00849 | activated RNA polymerase II transcriptional coactivator p15 [Gallus gallus]                          |
| isogroup00993 | PREDICTED: similar to interleukin 22-binding protein [Taeniopygia guttata]                           |
| isogroup01222 | PREDICTED: similar to pol-like protein ENS-3, partial [Taeniopygia guttata]                          |
| isogroup01269 | valosin-containing protein [Gallus gallus]                                                           |
| isogroup01578 | NA                                                                                                   |
| isogroup01716 | PREDICTED: similar to potassium channel modulatory factor 1 [Taeniopygia guttata]                    |
| isogroup01999 | NA                                                                                                   |
| isogroup02469 | putative protein kinase C inhibitor/ASWZ [Taeniopygia guttata]                                       |
| isogroup02829 | PREDICTED: similar to ARKadia-like 1 isoform 2 [Taeniopygia guttata]                                 |
| isogroup02863 | NA                                                                                                   |
| isogroup03130 | NA                                                                                                   |
| isogroup03190 | PREDICTED: hypothetical protein [Gallus gallus]                                                      |
| isogroup03917 | NA                                                                                                   |
| isogroup04099 | NA                                                                                                   |
| isogroup04474 | NA                                                                                                   |
| isogroup04702 | NA                                                                                                   |

| <b>Isogroup</b> | <b>Annotation from nr Database</b>                                                                                   |
|-----------------|----------------------------------------------------------------------------------------------------------------------|
| isogroup04710   | unnamed protein product [Homo sapiens]                                                                               |
| isogroup04876   | NA                                                                                                                   |
| isogroup05190   | PREDICTED: similar to Gag polyprotein [Taeniopygia guttata]                                                          |
| isogroup05470   | NA                                                                                                                   |
| isogroup05793   | PREDICTED: similar to polyprotein [Taeniopygia guttata]                                                              |
| isogroup06101   | PREDICTED: similar to rCG43799 [Taeniopygia guttata]                                                                 |
| isogroup06151   | NA                                                                                                                   |
| isogroup06326   | tumor necrosis factor, alpha-induced protein 6 [Gallus gallus]                                                       |
| isogroup06400   | YK047_HUMAN RecName: Full=Putative Ig-like domain-containing protein DKFZp686O24166/DKFZp686I21167; Flags: Precursor |
| isogroup08046   | NA                                                                                                                   |
| isogroup08540   | NA                                                                                                                   |
| isogroup09204   | NA                                                                                                                   |
| isogroup10572   | hypothetical protein LOC422926 [Gallus gallus]                                                                       |
| isogroup10667   | transcription factor BTF3 isoform 1 [Mus musculus]                                                                   |
| isogroup10781   | PREDICTED: similar to Gag-Pro-Pol protein [Taeniopygia guttata]                                                      |
| isogroup11168   | PREDICTED: similar to gag-pro-pol polyprotein [Taeniopygia guttata]                                                  |
| isogroup12400   | PREDICTED: similar to polymerase [Taeniopygia guttata]                                                               |
| isogroup13068   | PREDICTED: similar to MEX3C [Ornithorhynchus anatinus]                                                               |
| isogroup13902   | NA                                                                                                                   |
| isogroup14064   | PREDICTED: similar to pol-like protein ENS-3, partial [Taeniopygia guttata]                                          |
| isogroup15585   | NA                                                                                                                   |
| isogroup15653   | PREDICTED: similar to pol protein [Ornithorhynchus anatinus]                                                         |
| isogroup16214   | PREDICTED: similar to trans-Golgi protein GMx33 [Gallus gallus]                                                      |
| isogroup17167   | NA                                                                                                                   |
| isogroup17199   | POL-like [Gallus gallus]                                                                                             |
| isogroup17235   | NA                                                                                                                   |
| isogroup17762   | NA                                                                                                                   |
| isogroup19043   | env [Bonasa umbellus]                                                                                                |
| isogroup19373   | hypothetical protein [Gallus gallus]                                                                                 |
| isogroup19448   | PREDICTED: similar to pol protein [Taeniopygia guttata]                                                              |
| isogroup19487   | NA                                                                                                                   |
| isogroup19515   | NA                                                                                                                   |
| isogroup19731   | NA                                                                                                                   |
| isogroup19892   | cdc48 [Larimichthys crocea]                                                                                          |
| isogroup20441   | NA                                                                                                                   |

| <b>Isogroup</b> | <b>Annotation from nr Database</b>                                  |
|-----------------|---------------------------------------------------------------------|
| isogroup21286   | NA                                                                  |
| isogroup21763   | PREDICTED: similar to Gag-Pro-Pol-Env protein [Taeniopygia guttata] |
| isogroup22206   | mKIAA1376 protein [Mus musculus]                                    |
| contig90185     | NA                                                                  |

**Supplementary Table 9. Genes expressed higher in T-treated than control females in the medial amygdala.**

| <b>Isogroup</b> | <b>Annotation from nr Database</b>                                                                                     |
|-----------------|------------------------------------------------------------------------------------------------------------------------|
| isogroup00208   | PREDICTED: similar to KIAA1486 protein [Taeniopygia guttata]                                                           |
| isogroup00574   | PREDICTED: similar to semaphorin 5A [Taeniopygia guttata]                                                              |
| isogroup00786   | PREDICTED: hypothetical protein [Taeniopygia guttata]                                                                  |
| isogroup00865   | PREDICTED: glutamate receptor, metabotropic 8 [Taeniopygia guttata]                                                    |
| isogroup01057   | PREDICTED: similar to 1-phosphatidylinositol-4,5-bisphosphate phosphodiesterase beta-4 isoform 1 [Taeniopygia guttata] |
| isogroup01108   | PREDICTED: similar to KIAA1622 protein [Taeniopygia guttata]                                                           |
| isogroup01547   | NA                                                                                                                     |
| isogroup01555   | NA                                                                                                                     |
| isogroup01574   | PREDICTED: splicing factor, arginine/serine-rich 5 [Taeniopygia guttata]                                               |
| isogroup01755   | PREDICTED: hypothetical protein [Gallus gallus]                                                                        |
| isogroup01861   | NA                                                                                                                     |
| isogroup01927   | PREDICTED: similar to TFIIS central domain-containing protein 1 [Taeniopygia guttata]                                  |
| isogroup01948   | PREDICTED: ST8 alpha-N-acetyl-neuraminide alpha-2,8-sialyltransferase 5 [Taeniopygia guttata]                          |
| isogroup01988   | PREDICTED: oxysterol binding protein-like 6 [Taeniopygia guttata]                                                      |
| isogroup02108   | PREDICTED: NEDD4 binding protein 2 [Taeniopygia guttata]                                                               |
| isogroup02257   | regulator of G-protein signaling 7, isoform CRA_b [Rattus norvegicus]                                                  |
| isogroup02602   | PREDICTED: slit homolog 3 (Drosophila) [Taeniopygia guttata]                                                           |
| isogroup02712   | NA                                                                                                                     |
| isogroup02725   | neurexin 3 beta precursor [Gallus gallus]                                                                              |
| isogroup02775   | PREDICTED: similar to synaptic vesicle glycoprotein 2b [Taeniopygia guttata]                                           |
| isogroup02899   | PREDICTED: similar to IIDS6411 [Gallus gallus]                                                                         |
| isogroup02948   | PREDICTED: hypothetical protein [Taeniopygia guttata]                                                                  |
| isogroup03155   | PREDICTED: similar to rCG33261 [Taeniopygia guttata]                                                                   |
| isogroup03256   | PREDICTED: similar to KIF27A [Monodelphis domestica]                                                                   |
| isogroup03412   | NA                                                                                                                     |
| isogroup03607   | PREDICTED: zinc finger protein 533 [Taeniopygia guttata]                                                               |
| isogroup03626   | PREDICTED: GRIP and coiled-coil domain containing 2 [Taeniopygia guttata]                                              |
| isogroup03976   | PREDICTED: similar to inositol 1,4,5-trisphosphate 3-kinase B [Taeniopygia guttata]                                    |
| isogroup04019   | PREDICTED: dystonin [Taeniopygia guttata]                                                                              |
| isogroup04106   | NA                                                                                                                     |
| isogroup04503   | NA                                                                                                                     |
| isogroup04591   | NA                                                                                                                     |



| <b>Isogroup</b> | <b>Annotation from nr Database</b>                                                                                                                                                                  |
|-----------------|-----------------------------------------------------------------------------------------------------------------------------------------------------------------------------------------------------|
| isogroup04607   | PREDICTED: thyroid hormone receptor interactor 11 [Taeniopygia guttata]                                                                                                                             |
| isogroup04886   | NA                                                                                                                                                                                                  |
| isogroup04913   | NA                                                                                                                                                                                                  |
| isogroup05028   | PREDICTED: reelin [Taeniopygia guttata]                                                                                                                                                             |
| isogroup05209   | PREDICTED: neural precursor cell expressed, developmentally down-regulated 1 [Taeniopygia guttata]                                                                                                  |
| isogroup05219   | PREDICTED: similar to eukaryotic translation initiation factor 4 gamma, 3 [Gallus gallus]                                                                                                           |
| isogroup05426   | PREDICTED: similar to B-cell CLL/lymphoma 9 [Gallus gallus]                                                                                                                                         |
| isogroup05470   | NA                                                                                                                                                                                                  |
| isogroup05882   | PREDICTED: nebulette [Macaca mulatta]                                                                                                                                                               |
| isogroup05946   | NA                                                                                                                                                                                                  |
| isogroup06104   | NA                                                                                                                                                                                                  |
| isogroup06163   | PREDICTED: similar to KIAA0753 protein [Taeniopygia guttata]                                                                                                                                        |
| isogroup06266   | PREDICTED: lectin, galactoside-binding, soluble, 8 (galectin 8) [Taeniopygia guttata]                                                                                                               |
| isogroup06512   | NA                                                                                                                                                                                                  |
| isogroup06956   | PREDICTED: similar to Nesprin-1 (Nuclear envelope spectrin repeat protein 1) (Synaptic nuclear envelope protein 1) (Syne-1) (Myocyte nuclear envelope protein 1) (Myne-1) (Enaptin) [Gallus gallus] |
| isogroup07101   | NA                                                                                                                                                                                                  |
| isogroup07159   | putative stathmin-like 3 [Taeniopygia guttata]                                                                                                                                                      |
| isogroup07261   | NA                                                                                                                                                                                                  |
| isogroup07275   | NA                                                                                                                                                                                                  |
| isogroup07353   | PREDICTED: GRIP and coiled-coil domain containing 2 [Taeniopygia guttata]                                                                                                                           |
| isogroup07379   | PREDICTED: similar to protocadherin 9 [Sus scrofa]                                                                                                                                                  |
| isogroup07381   | PREDICTED: SATB homeobox 1 [Taeniopygia guttata]                                                                                                                                                    |
| isogroup07784   | NA                                                                                                                                                                                                  |
| isogroup07848   | NA                                                                                                                                                                                                  |
| isogroup07871   | PREDICTED: TNF receptor-associated factor 3 isoform 1 [Taeniopygia guttata]                                                                                                                         |
| isogroup08524   | NA                                                                                                                                                                                                  |
| isogroup08753   | NA                                                                                                                                                                                                  |
| isogroup09194   | NA                                                                                                                                                                                                  |
| isogroup09293   | POL-like [Gallus gallus]                                                                                                                                                                            |
| isogroup09388   | PREDICTED: TraB domain containing [Taeniopygia guttata]                                                                                                                                             |
| isogroup09413   | unknown [Gallus gallus]                                                                                                                                                                             |
| isogroup10025   | PREDICTED: similar to family with sequence similarity 102, member A [Taeniopygia guttata]                                                                                                           |

| <b>Isogroup</b> | <b>Annotation from nr Database</b>                                                                          |
|-----------------|-------------------------------------------------------------------------------------------------------------|
| isogroup10114   | PREDICTED: cytoglobin [Taeniopygia guttata]                                                                 |
| isogroup10165   | NA                                                                                                          |
| isogroup10211   | NA                                                                                                          |
| isogroup10365   | PREDICTED: chromosome 22 open reading frame 13 [Taeniopygia guttata]                                        |
| isogroup10565   | PREDICTED: myeloid/lymphoid or mixed-lineage leukemia (trithorax homolog, Drosophila) [Taeniopygia guttata] |
| isogroup10638   | NA                                                                                                          |
| isogroup10647   | NA                                                                                                          |
| isogroup10703   | NA                                                                                                          |
| isogroup10773   | PREDICTED: hypothetical protein [Taeniopygia guttata]                                                       |
| isogroup10827   | PREDICTED: similar to formin 2 [Taeniopygia guttata]                                                        |
| isogroup10880   | PREDICTED: ankyrin repeat domain 12 [Taeniopygia guttata]                                                   |
| isogroup10955   | NA                                                                                                          |
| isogroup11785   | NA                                                                                                          |
| isogroup11822   | NA                                                                                                          |
| isogroup12018   | NA                                                                                                          |
| isogroup12084   | PREDICTED: basic beta 1 syntrophin [Taeniopygia guttata]                                                    |
| isogroup12109   | NA                                                                                                          |
| isogroup12138   | PREDICTED: similar to KIAA0833 protein [Taeniopygia guttata]                                                |
| isogroup12192   | NA                                                                                                          |
| isogroup12421   | NA                                                                                                          |
| isogroup12451   | PREDICTED: RALBP1 associated Eps domain containing 2 [Taeniopygia guttata]                                  |
| isogroup12666   | PREDICTED: similar to chorea-acanthocytosis [Taeniopygia guttata]                                           |
| isogroup12838   | NA                                                                                                          |
| isogroup12966   | PREDICTED: similar to SLIT and NTRK-like family, member 4 [Taeniopygia guttata]                             |
| isogroup12980   | NA                                                                                                          |
| isogroup13155   | PREDICTED: regulator of G-protein signalling 7 [Taeniopygia guttata]                                        |
| isogroup13297   | NA                                                                                                          |
| isogroup13324   | NA                                                                                                          |
| isogroup13483   | NA                                                                                                          |
| isogroup13518   | NA                                                                                                          |
| isogroup13725   | PREDICTED: centrosomal protein 290kDa [Taeniopygia guttata]                                                 |
| isogroup13767   | NA                                                                                                          |
| isogroup13774   | PREDICTED: chromosome 7 open reading frame 16 [Taeniopygia guttata]                                         |
| isogroup13900   | AF362753_1 cer-d4 [Gallus gallus]                                                                           |
| isogroup13948   | PREDICTED: ryanodine receptor 2 (cardiac) [Taeniopygia guttata]                                             |

| <b>Isogroup</b> | <b>Annotation from nr Database</b>                                                                                                                                                                  |
|-----------------|-----------------------------------------------------------------------------------------------------------------------------------------------------------------------------------------------------|
| isogroup14159   | PREDICTED: ubiquitin specific peptidase 13 (isopeptidase T-3) [Taeniopygia guttata]                                                                                                                 |
| isogroup14299   | NA                                                                                                                                                                                                  |
| isogroup14377   | NA                                                                                                                                                                                                  |
| isogroup14692   | PREDICTED: similar to ribosomal protein L7-like 1 [Taeniopygia guttata]                                                                                                                             |
| isogroup15075   | NA                                                                                                                                                                                                  |
| isogroup15096   | chromodomain-helicase-DNA-binding protein 7 [Gallus gallus]                                                                                                                                         |
| isogroup15222   | NA                                                                                                                                                                                                  |
| isogroup15235   | NA                                                                                                                                                                                                  |
| isogroup15269   | PREDICTED: similar to centrosomal protein 2 [Gallus gallus]                                                                                                                                         |
| isogroup15454   | NA                                                                                                                                                                                                  |
| isogroup15468   | PREDICTED: protocadherin 9 [Taeniopygia guttata]                                                                                                                                                    |
| isogroup15486   | interferon-related developmental regulator 1 [Gallus gallus]                                                                                                                                        |
| isogroup15693   | NA                                                                                                                                                                                                  |
| isogroup15730   | NA                                                                                                                                                                                                  |
| isogroup15768   | PREDICTED: similar to collagen, type XII, alpha 1 [Taeniopygia guttata]                                                                                                                             |
| isogroup16272   | NA                                                                                                                                                                                                  |
| isogroup16714   | PREDICTED: RAS p21 protein activator 2 [Taeniopygia guttata]                                                                                                                                        |
| isogroup16821   | PREDICTED: similar to myosin 10 [Taeniopygia guttata]                                                                                                                                               |
| isogroup16893   | NA                                                                                                                                                                                                  |
| isogroup16963   | PREDICTED: similar to mutS homolog 4 (E. coli), partial [Taeniopygia guttata]                                                                                                                       |
| isogroup17432   | PREDICTED: similar to Nesprin-1 (Nuclear envelope spectrin repeat protein 1) (Synaptic nuclear envelope protein 1) (Syne-1) (Myocyte nuclear envelope protein 1) (Myne-1) (Enaptin) [Gallus gallus] |
| isogroup17447   | chromodomain-helicase-DNA-binding protein 7 [Gallus gallus]                                                                                                                                         |
| isogroup17481   | NA                                                                                                                                                                                                  |
| isogroup17492   | NA                                                                                                                                                                                                  |
| isogroup17626   | NA                                                                                                                                                                                                  |
| isogroup17828   | NA                                                                                                                                                                                                  |
| isogroup17831   | NA                                                                                                                                                                                                  |
| isogroup18038   | NA                                                                                                                                                                                                  |
| isogroup18155   | NA                                                                                                                                                                                                  |
| isogroup18197   | NA                                                                                                                                                                                                  |
| isogroup18244   | NA                                                                                                                                                                                                  |
| isogroup18339   | NA                                                                                                                                                                                                  |
| isogroup18352   | NA                                                                                                                                                                                                  |
| isogroup18608   | PREDICTED: similar to copine III isoform 2 [Taeniopygia guttata]                                                                                                                                    |

| <b>Isogroup</b> | <b>Annotation from nr Database</b>                                                                                       |
|-----------------|--------------------------------------------------------------------------------------------------------------------------|
| isogroup18724   | PREDICTED: splicing factor, arginine/serine-rich 18 [Taeniopygia guttata]                                                |
| isogroup18942   | NA                                                                                                                       |
| isogroup18953   | PREDICTED: similar to leucine rich repeat containing 8 family, member B [Taeniopygia guttata]                            |
| isogroup19062   | PREDICTED: similar to collagen, type XII, alpha 1 [Taeniopygia guttata]                                                  |
| isogroup19160   | PREDICTED: solute carrier family 12 (sodium/potassium/chloride transporters), member 2 [Taeniopygia guttata]             |
| isogroup19477   | PREDICTED: hypothetical protein [Taeniopygia guttata]                                                                    |
| isogroup19617   | NA                                                                                                                       |
| isogroup19912   | PREDICTED: similar to solute carrier family 4, sodium bicarbonate transporter-like, member 10 [Ornithorhynchus anatinus] |
| isogroup20449   | PREDICTED: similar to spastic ataxia of Charlevoix-Saguenay (sacsin) [Gallus gallus]                                     |
| isogroup20476   | NA                                                                                                                       |
| isogroup20497   | NA                                                                                                                       |
| isogroup20549   | NA                                                                                                                       |
| isogroup20701   | chromodomain-helicase-DNA-binding protein 7 [Gallus gallus]                                                              |
| isogroup20808   | NA                                                                                                                       |
| isogroup20821   | NA                                                                                                                       |
| isogroup20959   | PREDICTED: hypothetical protein [Taeniopygia guttata]                                                                    |
| isogroup21032   | NA                                                                                                                       |
| isogroup21056   | NA                                                                                                                       |
| isogroup21069   | NA                                                                                                                       |
| isogroup21083   | SPHK1 interactor, AKAP domain containing [Taeniopygia guttata]                                                           |
| isogroup21379   | NA                                                                                                                       |
| isogroup21987   | PREDICTED: hypothetical protein [Gallus gallus]                                                                          |
| isogroup22031   | NA                                                                                                                       |
| isogroup22221   | PREDICTED: similar to RAS protein activator like 2 [Gallus gallus]                                                       |
| isogroup22484   | AF355752_1 reverse transcriptase [Chelonia mydas]                                                                        |
| isogroup22534   | NA                                                                                                                       |
| isogroup22581   | NA                                                                                                                       |
| isogroup22638   | PREDICTED: transient receptor potential cation channel, subfamily M, member 8 [Taeniopygia guttata]                      |
| isogroup22721   | ORF2 [Platemys spixii]                                                                                                   |
| contig90074     | NA                                                                                                                       |
| contig90116     | NA                                                                                                                       |
| contig90192     | NA                                                                                                                       |

| <b>Isogroup</b> | <b>Annotation from nr Database</b> |
|-----------------|------------------------------------|
| contig90199     | NA                                 |
| contig90201     | NA                                 |

**Supplementary Table 10. Genes expressed lower in T-treated than control females in the medial amygdala.**

| <b>Isogroup</b> | <b>Annotation from nr Database</b>                                                              |
|-----------------|-------------------------------------------------------------------------------------------------|
| isogroup00584   | PREDICTED: phosphotriesterase related [Taeniopygia guttata]                                     |
| isogroup00650   | NA                                                                                              |
| isogroup01101   | PREDICTED: mitochondrial ribosomal protein L18 [Taeniopygia guttata]                            |
| isogroup02339   | PREDICTED: similar to opioid receptor, kappa 1 [Taeniopygia guttata]                            |
| isogroup02915   | PREDICTED: similar to heat shock protein 70kDa [Taeniopygia guttata]                            |
| isogroup03014   | PREDICTED: sperm associated antigen 16 [Taeniopygia guttata]                                    |
| isogroup03227   | NA                                                                                              |
| isogroup03438   | PREDICTED: hypothetical protein [Gallus gallus]                                                 |
| isogroup03755   | putative neurotensin variant 1 [Taeniopygia guttata]                                            |
| isogroup04378   | NA                                                                                              |
| isogroup04509   | PREDICTED: similar to Adenylate kinase isoenzyme 5, partial [Taeniopygia guttata]               |
| isogroup04887   | PREDICTED: enoyl Coenzyme A hydratase domain containing 2 [Taeniopygia guttata]                 |
| isogroup04912   | NA                                                                                              |
| isogroup05026   | PREDICTED: hypothetical protein [Gallus gallus]                                                 |
| isogroup05078   | NA                                                                                              |
| isogroup05100   | PREDICTED: monoamine oxidase A [Taeniopygia guttata]                                            |
| isogroup05198   | PREDICTED: similar to polymerase [Taeniopygia guttata]                                          |
| isogroup05737   | putative ribosomal protein S19 [Taeniopygia guttata]                                            |
| isogroup06188   | NA                                                                                              |
| isogroup06191   | PREDICTED: similar to Discoidin, CUB and LCCL domain-containing protein 1 [Taeniopygia guttata] |
| isogroup06326   | tumor necrosis factor, alpha-induced protein 6 [Gallus gallus]                                  |
| isogroup06451   | PREDICTED: parvalbumin [Taeniopygia guttata]                                                    |
| isogroup06491   | NA                                                                                              |
| isogroup06530   | NA                                                                                              |
| isogroup06945   | PREDICTED: similar to Tetratricopeptide repeat domain 39A [Taeniopygia guttata]                 |
| isogroup07236   | NA                                                                                              |
| isogroup07264   | NA                                                                                              |
| isogroup07330   | NA                                                                                              |
| isogroup07371   | NA                                                                                              |
| isogroup07544   | PREDICTED: hypothetical protein [Taeniopygia guttata]                                           |
| isogroup07899   | putative Schwann cell-specific EGF-like repeat autocrine factor [Taeniopygia guttata]           |
| isogroup07917   | NA                                                                                              |
| isogroup07997   | NA                                                                                              |

| <b>Isogroup</b> | <b>Annotation from nr Database</b>                                                 |
|-----------------|------------------------------------------------------------------------------------|
| isogroup08029   | NA                                                                                 |
| isogroup08034   | DNA-dependent protein kinase catalytic subunit [Gallus gallus]                     |
| isogroup08059   | NA                                                                                 |
| isogroup08135   | PREDICTED: WD repeat domain 5 [Taeniopygia guttata]                                |
| isogroup08243   | NA                                                                                 |
| isogroup08283   | NA                                                                                 |
| isogroup08341   | NA                                                                                 |
| isogroup08480   | NA                                                                                 |
| isogroup08606   | NA                                                                                 |
| isogroup08732   | NA                                                                                 |
| isogroup08788   | NA                                                                                 |
| isogroup09028   | PREDICTED: similar to autoimmune infertility-related protein [Taeniopygia guttata] |
| isogroup09044   | NA                                                                                 |
| isogroup09053   | NA                                                                                 |
| isogroup09539   | NA                                                                                 |
| isogroup09648   | NA                                                                                 |
| isogroup09791   | PREDICTED: FK506 binding protein 14, 22 kDa [Taeniopygia guttata]                  |
| isogroup09831   | NA                                                                                 |
| isogroup09947   | NA                                                                                 |
| isogroup09973   | NA                                                                                 |
| isogroup09978   | NA                                                                                 |
| isogroup10032   | NA                                                                                 |
| isogroup10208   | NA                                                                                 |
| isogroup10233   | PREDICTED: hypothetical protein [Taeniopygia guttata]                              |
| isogroup10242   | NA                                                                                 |
| isogroup10244   | NA                                                                                 |
| isogroup10401   | NA                                                                                 |
| isogroup10403   | NA                                                                                 |
| isogroup10681   | actin related protein 2/3 complex subunit 5 [Gallus gallus]                        |
| isogroup10848   | PREDICTED: suppressor of G2 allele of SKP1 [Taeniopygia guttata]                   |
| isogroup10861   | PREDICTED: hypothetical protein [Taeniopygia guttata]                              |
| isogroup10914   | NA                                                                                 |
| isogroup11062   | PREDICTED: hypothetical protein [Taeniopygia guttata]                              |
| isogroup11139   | PREDICTED: solute carrier family 47, member 2 [Taeniopygia guttata]                |
| isogroup11319   | NA                                                                                 |
| isogroup11438   | NA                                                                                 |

| <b>Isogroup</b> | <b>Annotation from nr Database</b>                                            |
|-----------------|-------------------------------------------------------------------------------|
| isogroup11507   | NA                                                                            |
| isogroup12010   | PREDICTED: reprimo-like [Taeniopygia guttata]                                 |
| isogroup12351   | NA                                                                            |
| isogroup12597   | NA                                                                            |
| isogroup12757   | NA                                                                            |
| isogroup12920   | PREDICTED: similar to alphaT-catenin [Gallus gallus]                          |
| isogroup13184   | NA                                                                            |
| isogroup13307   | PREDICTED: monoamine oxidase A [Taeniopygia guttata]                          |
| isogroup13347   | NA                                                                            |
| isogroup13403   | PREDICTED: putative ribosomal protein S11 [Taeniopygia guttata]               |
| isogroup13509   | NA                                                                            |
| isogroup13715   | NA                                                                            |
| isogroup13716   | PREDICTED: similar to tetraspanin 6 [Gallus gallus]                           |
| isogroup14050   | PREDICTED: putative preproenkephalin 1 [Taeniopygia guttata]                  |
| isogroup14211   | PREDICTED: hypothetical protein [Taeniopygia guttata]                         |
| isogroup14300   | NA                                                                            |
| isogroup14407   | NA                                                                            |
| isogroup14447   | putative RIKEN cDNA 2900055D14 [Taeniopygia guttata]                          |
| isogroup14539   | NA                                                                            |
| isogroup14565   | putative actin related protein 2/3 complex subunit 3 [Taeniopygia guttata]    |
| isogroup14780   | NA                                                                            |
| isogroup14837   | PREDICTED: putative mitochondrial ribosomal protein S14 [Taeniopygia guttata] |
| isogroup14908   | NA                                                                            |
| isogroup14947   | NA                                                                            |
| isogroup14976   | NA                                                                            |
| isogroup15108   | NA                                                                            |
| isogroup15127   | hypothetical protein PANDA_012261 [Ailuropoda melanoleuca]                    |
| isogroup15141   | PREDICTED: similar to Gpr7 [Taeniopygia guttata]                              |
| isogroup15208   | NA                                                                            |
| isogroup15405   | PREDICTED: similar to Sucrase-isomaltase, intestinal [Gallus gallus]          |
| isogroup15617   | ribosomal protein S13 [synthetic construct]                                   |
| isogroup15823   | PREDICTED: galanin receptor 3 [Taeniopygia guttata]                           |
| isogroup15923   | NA                                                                            |
| isogroup16058   | NA                                                                            |
| isogroup16245   | NA                                                                            |
| isogroup16415   | NA                                                                            |



| <b>Isogroup</b> | <b>Annotation from nr Database</b>                                                       |
|-----------------|------------------------------------------------------------------------------------------|
| isogroup16468   | PREDICTED: similar to heparin cofactor II [Gallus gallus]                                |
| isogroup16521   | NA                                                                                       |
| isogroup16558   | PREDICTED: similar to DTW domain containing 1 [Taeniopygia guttata]                      |
| isogroup16574   | PREDICTED: protein tyrosine phosphatase, receptor type, M [Taeniopygia guttata]          |
| isogroup16576   | PREDICTED: hypothetical protein isoform 2 [Pan troglodytes]                              |
| isogroup16611   | NA                                                                                       |
| isogroup16703   | NA                                                                                       |
| isogroup16804   | PREDICTED: similar to insulinoma protein (rig) [Monodelphis domestica]                   |
| isogroup16824   | PREDICTED: LIM homeobox 8 [Taeniopygia guttata]                                          |
| isogroup17012   | mCG49427 [Mus musculus]                                                                  |
| isogroup17169   | NA                                                                                       |
| isogroup17178   | NA                                                                                       |
| isogroup17181   | NA                                                                                       |
| isogroup17559   | PREDICTED: similar to leucine rich repeat transmembrane neuronal 1 [Taeniopygia guttata] |
| isogroup17664   | PREDICTED: sclerostin domain containing 1 [Taeniopygia guttata]                          |
| isogroup17717   | NA                                                                                       |
| isogroup17788   | NA                                                                                       |
| isogroup17968   | NA                                                                                       |
| isogroup18039   | PREDICTED: similar to Leucine rich repeat containing 56 [Monodelphis domestica]          |
| isogroup18049   | tumor necrosis factor receptor superfamily, member 21 [Zonotrichia albicollis]           |
| isogroup18184   | PREDICTED: centrin, EF-hand protein, 1 [Taeniopygia guttata]                             |
| isogroup18286   | NA                                                                                       |
| isogroup18439   | NA                                                                                       |
| isogroup18768   | NA                                                                                       |
| isogroup18823   | NA                                                                                       |
| isogroup19158   | PREDICTED: interleukin 18 (interferon-gamma-inducing factor) [Taeniopygia guttata]       |
| isogroup19195   | PREDICTED: similar to rCG28794 [Taeniopygia guttata]                                     |
| isogroup19269   | NA                                                                                       |
| isogroup19455   | NA                                                                                       |
| isogroup19720   | NA                                                                                       |
| isogroup19752   | PREDICTED: hypothetical protein [Taeniopygia guttata]                                    |
| isogroup19929   | NA                                                                                       |
| isogroup19932   | PREDICTED: hairy and enhancer of split 5 isoform 1 [Taeniopygia guttata]                 |
| isogroup20545   | NA                                                                                       |

| <b>Isogroup</b> | <b>Annotation from nr Database</b>                                                                             |
|-----------------|----------------------------------------------------------------------------------------------------------------|
| isogroup20559   | PREDICTED: RPA interacting protein [Taeniopygia guttata]                                                       |
| isogroup20567   | PREDICTED: monooxygenase, DBH-like 1 [Taeniopygia guttata]                                                     |
| isogroup20624   | NA                                                                                                             |
| isogroup20723   | PREDICTED: golgi autoantigen, golgin subfamily a, 7 [Taeniopygia guttata]                                      |
| isogroup20813   | signal peptidase complex subunit 1 homolog [Gallus gallus]                                                     |
| isogroup21215   | NA                                                                                                             |
| isogroup21241   | PREDICTED: similar to ATPase, H <sup>+</sup> transporting, lysosomal V0 subunit a isoform 2 [Canis familiaris] |
| isogroup21277   | PREDICTED: interleukin 16 [Taeniopygia guttata]                                                                |
| isogroup21319   | NA                                                                                                             |
| isogroup21632   | NA                                                                                                             |
| isogroup21653   | NA                                                                                                             |
| isogroup21676   | NA                                                                                                             |
| isogroup21706   | NA                                                                                                             |
| isogroup21960   | NA                                                                                                             |
| isogroup22057   | NA                                                                                                             |
| isogroup22080   | NA                                                                                                             |
| isogroup22180   | NA                                                                                                             |
| isogroup22589   | NA                                                                                                             |
| isogroup22713   | NA                                                                                                             |
| isogroup22723   | PREDICTED: hypothetical protein [Gallus gallus]                                                                |
| contig90154     | NA                                                                                                             |

**Supplementary Table 11. Gene Ontology terms over-represented among genes significantly differentially expressed between T-treated and control females in the medial amygdala.**

| <b>GO ID</b> | <b>GO Description</b>                                |
|--------------|------------------------------------------------------|
| GO:0001505   | regulation of neurotransmitter levels                |
| GO:0001944   | vasculature development                              |
| GO:0003013   | circulatory system process                           |
| GO:0008344   | adult locomotory behavior                            |
| GO:0008406   | gonad development                                    |
| GO:0021675   | nerve development                                    |
| GO:0030252   | growth hormone secretion                             |
| GO:0030326   | embryonic limb morphogenesis                         |
| GO:0031109   | microtubule polymerization or depolymerization       |
| GO:0035264   | multicellular organism growth                        |
| GO:0042471   | ear morphogenesis                                    |
| GO:0043010   | camera-type eye development                          |
| GO:0046545   | development of primary female sexual characteristics |
| GO:0005198   | structural molecule activity                         |
| GO:0008528   | G-protein coupled peptide receptor activity          |
| GO:0005840   | ribosome                                             |
| GO:0015935   | small ribosomal subunit                              |
| GO:0035097   | histone methyltransferase complex                    |

**Supplementary Table 12. Genes expressed higher in T-treated than control females in hypothalamus.**

| <b>Isogroup</b> | <b>Annotation from nr Database</b>                                                        |
|-----------------|-------------------------------------------------------------------------------------------|
| isogroup01688   | PREDICTED: similar to MBP-2 (MHC Binding Protein-2) [Taeniopygia guttata]                 |
| isogroup01966   | NA                                                                                        |
| isogroup02363   | cytochrome P450, family 19, subfamily A, polypeptide 1 [Taeniopygia guttata]              |
| isogroup02560   | unnamed protein product [Homo sapiens]                                                    |
| isogroup02830   | NA                                                                                        |
| isogroup03358   | PREDICTED: similar to EEF2K protein [Taeniopygia guttata]                                 |
| isogroup04503   | NA                                                                                        |
| isogroup04575   | PREDICTED: hypothetical protein [Taeniopygia guttata]                                     |
| isogroup04715   | PREDICTED: similar to CDC42 binding protein kinase beta (DMPK-like) [Gallus gallus]       |
| isogroup04886   | NA                                                                                        |
| isogroup05219   | PREDICTED: similar to eukaryotic translation initiation factor 4 gamma, 3 [Gallus gallus] |
| isogroup05441   | NA                                                                                        |
| isogroup05946   | NA                                                                                        |
| isogroup06072   | PREDICTED: similar to plasma membrane calcium ATPase 2 isoform 5 [Gallus gallus]          |
| isogroup06893   | PREDICTED: hypothetical protein [Taeniopygia guttata]                                     |
| isogroup07713   | NA                                                                                        |
| isogroup08448   | PREDICTED: IQ motif containing E [Taeniopygia guttata]                                    |
| isogroup08467   | NA                                                                                        |
| isogroup08624   | PREDICTED: transmembrane protein 55A [Taeniopygia guttata]                                |
| isogroup08921   | NA                                                                                        |
| isogroup09761   | PREDICTED: similar to prominin-like 1 [Taeniopygia guttata]                               |
| isogroup12451   | PREDICTED: RALBP1 associated Eps domain containing 2 [Taeniopygia guttata]                |
| isogroup14159   | PREDICTED: ubiquitin specific peptidase 13 (isopeptidase T-3) [Taeniopygia guttata]       |
| isogroup14232   | PREDICTED: F-box only protein 32 [Taeniopygia guttata]                                    |
| isogroup14234   | PREDICTED: ryanodine receptor 2 (cardiac) [Taeniopygia guttata]                           |
| isogroup14253   | NA                                                                                        |
| isogroup14354   | PREDICTED: similar to MBP-2 (MHC Binding Protein-2) [Taeniopygia guttata]                 |
| isogroup14692   | PREDICTED: similar to ribosomal protein L7-like 1 [Taeniopygia guttata]                   |
| isogroup14839   | NA                                                                                        |
| isogroup15212   | NA                                                                                        |
| isogroup15454   | NA                                                                                        |

| <b>Isogroup</b> | <b>Annotation from nr Database</b>                                                              |
|-----------------|-------------------------------------------------------------------------------------------------|
| isogroup15707   | PREDICTED: human immunodeficiency virus type I enhancer binding protein 1 [Taeniopygia guttata] |
| isogroup15736   | PREDICTED: lipoprotein lipase [Taeniopygia guttata]                                             |
| isogroup15794   | PREDICTED: ArfGAP with GTPase domain, ankyrin repeat and PH domain 1 [Taeniopygia guttata]      |
| isogroup15864   | cannabinoid receptor 1 (brain) [Taeniopygia guttata]                                            |
| isogroup16272   | NA                                                                                              |
| isogroup17074   | PREDICTED: ryanodine receptor 2 (cardiac) [Taeniopygia guttata]                                 |
| isogroup17170   | calcineurin A alpha [Gallus gallus]                                                             |
| isogroup17550   | PREDICTED: ryanodine receptor 2 (cardiac) [Taeniopygia guttata]                                 |
| isogroup18416   | NA                                                                                              |
| isogroup18473   | PREDICTED: similar to MGC115225 protein [Taeniopygia guttata]                                   |
| isogroup19083   | PREDICTED: latrophilin 3 [Equus caballus]                                                       |
| isogroup19864   | NA                                                                                              |
| isogroup20240   | NA                                                                                              |
| isogroup20578   | NA                                                                                              |
| isogroup20987   | transmembrane channel-like 7 [Gallus gallus]                                                    |
| isogroup21068   | PREDICTED: similar to SETDB2 protein [Taeniopygia guttata]                                      |
| isogroup21131   | NA                                                                                              |
| isogroup22201   | PREDICTED: similar to CXXC finger 6 [Taeniopygia guttata]                                       |

**Supplementary Table 13. Genes expressed lower in T-treated than control females in hypothalamus.**

| <b>Isogroup</b> | <b>Annotation from nr Database</b>                                                                        |
|-----------------|-----------------------------------------------------------------------------------------------------------|
| isogroup00934   | PREDICTED: ADP-ribosylation factor binding protein 3 [Taeniopygia guttata]                                |
| isogroup01698   | PREDICTED: tumor necrosis factor receptor superfamily, member 11b (osteoprotegerin) [Taeniopygia guttata] |
| isogroup02599   | NA                                                                                                        |
| isogroup05794   | NA                                                                                                        |
| isogroup06596   | PREDICTED: similar to HSPC287 [Taeniopygia guttata]                                                       |
| isogroup07298   | PREDICTED: family with sequence similarity 108, member B1 [Taeniopygia guttata]                           |
| isogroup07371   | NA                                                                                                        |
| isogroup09237   | NA                                                                                                        |
| isogroup09253   | signal sequence receptor, beta, isoform CRA_a [Mus musculus]                                              |
| isogroup09356   | PREDICTED: hypothetical protein LOC100190396 [Taeniopygia guttata]                                        |
| isogroup11399   | PREDICTED: hypothetical protein [Gallus gallus]                                                           |
| isogroup11507   | NA                                                                                                        |
| isogroup11590   | NA                                                                                                        |
| isogroup11764   | NA                                                                                                        |
| isogroup11851   | NA                                                                                                        |
| isogroup12176   | NA                                                                                                        |
| isogroup12920   | PREDICTED: similar to alphaT-catenin [Gallus gallus]                                                      |
| isogroup13234   | PREDICTED: hypothetical protein [Taeniopygia guttata]                                                     |
| isogroup14417   | NA                                                                                                        |
| isogroup15113   | NA                                                                                                        |
| isogroup17568   | PREDICTED: WNT inhibitory factor 1 [Taeniopygia guttata]                                                  |
| isogroup17584   | NA                                                                                                        |
| isogroup17717   | NA                                                                                                        |
| isogroup18342   | placenta-specific 8 [Mus musculus]                                                                        |
| isogroup19158   | PREDICTED: interleukin 18 (interferon-gamma-inducing factor) [Taeniopygia guttata]                        |
| isogroup19446   | NA                                                                                                        |
| isogroup19455   | NA                                                                                                        |
| isogroup19660   | PREDICTED: similar to MTERF domain containing 3 [Taeniopygia guttata]                                     |
| isogroup20422   | neuropeptide Y precursor [Gallus gallus]                                                                  |
| isogroup22713   | NA                                                                                                        |

**Supplementary Table 14. Gene Ontology terms over-represented among genes significantly differentially expressed between T-treated and control females in the hypothalamus.**

| <b>GO ID</b> | <b>GO Description</b>                                                                   |
|--------------|-----------------------------------------------------------------------------------------|
| GO:0006941   | striated muscle contraction                                                             |
| GO:0007186   | G-protein coupled receptor signaling pathway                                            |
| GO:0008624   | induction of apoptosis by extracellular signals                                         |
| GO:0009593   | detection of chemical stimulus                                                          |
| GO:0010038   | response to metal ion                                                                   |
| GO:0010880   | regulation of release of sequestered calcium ion into cytosol by sarcoplasmic reticulum |
| GO:0014074   | response to purine-containing compound                                                  |
| GO:0031667   | response to nutrient levels                                                             |
| GO:0070838   | divalent metal ion transport                                                            |
| GO:0005218   | intracellular ligand-gated calcium channel activity                                     |
| GO:0046872   | metal ion binding                                                                       |
| GO:0051018   | protein kinase A binding                                                                |
| GO:0005789   | endoplasmic reticulum membrane                                                          |
| GO:0031674   | I band                                                                                  |
| GO:0034702   | ion channel complex                                                                     |

**Supplementary Table 15. Genes expressed higher in T-treated than control females in both the medial amygdala and hypothalamus.**

| <b>Isogroup</b> | <b>Annotation from nr Database</b>                                                        |
|-----------------|-------------------------------------------------------------------------------------------|
| isogroup04503   | NA                                                                                        |
| isogroup04886   | NA                                                                                        |
| isogroup05219   | PREDICTED: similar to eukaryotic translation initiation factor 4 gamma, 3 [Gallus gallus] |
| isogroup05946   | NA                                                                                        |
| isogroup12451   | PREDICTED: RALBP1 associated Eps domain containing 2 [Taeniopygia guttata]                |
| isogroup14159   | PREDICTED: ubiquitin specific peptidase 13 (isopeptidase T-3) [Taeniopygia guttata]       |
| isogroup14692   | PREDICTED: similar to ribosomal protein L7-like 1 [Taeniopygia guttata]                   |
| isogroup15454   | NA                                                                                        |
| isogroup16272   | NA                                                                                        |



**Supplementary Table 16. Genes expressed lower in T-treated than control females in both the medial amygdala and hypothalamus.**

| <b>Isogroup</b> | <b>Annotation from nr Database</b>                                                 |
|-----------------|------------------------------------------------------------------------------------|
| isogroup07371   | NA                                                                                 |
| isogroup11507   | NA                                                                                 |
| isogroup12920   | PREDICTED: similar to alphaT-catenin [Gallus gallus]                               |
| isogroup17717   | NA                                                                                 |
| isogroup19158   | PREDICTED: interleukin 18 (interferon-gamma-inducing factor) [Taeniopygia guttata] |
| isogroup19455   | NA                                                                                 |
| isogroup22713   | NA                                                                                 |

**Supplementary Table 17. Genes expressed higher in T-treated than control males in the medial amygdala.**

| <b>Isogroup</b> | <b>Annotation from nr Database</b>                                                                 |
|-----------------|----------------------------------------------------------------------------------------------------|
| isogroup03488   | putative MGC89063 protein variant 2 [Taeniopygia guttata]                                          |
| isogroup05526   | PREDICTED: similar to GekBS018P [Taeniopygia guttata]                                              |
| isogroup06043   | PREDICTED: carboxypeptidase A2 (pancreatic) [Taeniopygia guttata]                                  |
| isogroup07410   | PREDICTED: testin [Taeniopygia guttata]                                                            |
| isogroup08239   | PREDICTED: similar to inositol-1,4,5-trisphosphate-3-kinase, partial [Taeniopygia guttata]         |
| isogroup09891   | R envelope protein [Pongo pygmaeus]                                                                |
| isogroup10000   | NA                                                                                                 |
| isogroup14755   | PREDICTED: similar to GABA-A receptor alpha-3 subunit [Monodelphis domestica]                      |
| isogroup17230   | PREDICTED: similar to solute carrier family 30 (zinc transporter), member 10 [Taeniopygia guttata] |
| isogroup18791   | ORF2 [Platemys spixii]                                                                             |
| isogroup18901   | PREDICTED: similar to complement C4 [Taeniopygia guttata]                                          |
| isogroup19308   | PREDICTED: solute carrier family 18 (vesicular monoamine), member 2 [Taeniopygia guttata]          |
| isogroup19873   | PREDICTED: similar to sulfonyleurea receptor isoform 1 [Gallus gallus]                             |
| isogroup21866   | NA                                                                                                 |
| contig90180     | NA                                                                                                 |

**Supplementary Table 18. Genes expressed lower in T-treated than control males in the medial amygdala.**

| <b>Isogroup</b> | <b>Annotation from nr Database</b>                                                                                         |
|-----------------|----------------------------------------------------------------------------------------------------------------------------|
| isogroup03275   | PREDICTED: similar to solute carrier family 7, (neutral amino acid transporter, y+ system) member 10 [Taeniopygia guttata] |
| isogroup04720   | PREDICTED: non-imprinted in Prader-Willi/Angelman syndrome 1 [Taeniopygia guttata]                                         |
| isogroup05470   | NA                                                                                                                         |
| isogroup05496   | PREDICTED: osteoglycin [Taeniopygia guttata]                                                                               |
| isogroup06584   | PREDICTED: similar to transcription factor AP2-alpha isoform 2 [Ornithorhynchus anatinus]                                  |
| isogroup07415   | NA                                                                                                                         |
| isogroup09588   | NA                                                                                                                         |
| isogroup10647   | NA                                                                                                                         |
| isogroup14971   | PREDICTED: similar to chondroadherin [Taeniopygia guttata]                                                                 |
| isogroup16303   | PREDICTED: similar to Hepatocyte nuclear factor 6 (HNF-6) (One cut domain family member 1) isoform 1 [Canis familiaris]    |
| isogroup16448   | NA                                                                                                                         |
| isogroup16526   | PREDICTED: similar to potassium inwardly-rectifying channel J13 [Taeniopygia guttata]                                      |
| isogroup17579   | NA                                                                                                                         |
| isogroup18736   | NA                                                                                                                         |
| isogroup19239   | NA                                                                                                                         |
| isogroup20010   | Hox-8 [Gallus gallus]                                                                                                      |
| isogroup20096   | NA                                                                                                                         |
| isogroup20312   | PREDICTED: similar to retinoic acid receptor responder (tazarotene induced) 1 [Taeniopygia guttata]                        |
| isogroup20809   | PREDICTED: solute carrier organic anion transporter family, member 1C1 [Taeniopygia guttata]                               |
| isogroup21077   | NA                                                                                                                         |
| isogroup22638   | PREDICTED: transient receptor potential cation channel, subfamily M, member 8 [Taeniopygia guttata]                        |

**Supplementary Table 19. Genes expressed higher in T-treated than control males in hypothalamus.**

| Isogroup      | Annotation from nr Database                                                          |
|---------------|--------------------------------------------------------------------------------------|
| isogroup00789 | NA                                                                                   |
| isogroup01128 | PREDICTED: similar to KIAA1882 protein [Gallus gallus]                               |
| isogroup02136 | PREDICTED: similar to carotene-9,10-monooxygenase [Taeniopygia guttata]              |
| isogroup02234 | PREDICTED: similar to KIAA1882 protein [Gallus gallus]                               |
| isogroup02363 | cytochrome P450, family 19, subfamily A, polypeptide 1 [Taeniopygia guttata]         |
| isogroup03488 | putative MGC89063 protein variant 2 [Taeniopygia guttata]                            |
| isogroup04057 | NA                                                                                   |
| isogroup04099 | NA                                                                                   |
| isogroup05819 | NA                                                                                   |
| isogroup06043 | PREDICTED: carboxypeptidase A2 (pancreatic) [Taeniopygia guttata]                    |
| isogroup06326 | tumor necrosis factor, alpha-induced protein 6 [Gallus gallus]                       |
| isogroup06604 | PREDICTED: glycerol-3-phosphate acyltransferase, mitochondrial [Taeniopygia guttata] |
| isogroup06970 | DNA-dependent protein kinase catalytic subunit [Gallus gallus]                       |
| isogroup07064 | NA                                                                                   |
| isogroup07410 | PREDICTED: testin [Taeniopygia guttata]                                              |
| isogroup07558 | PREDICTED: similar to Transmembrane anchor protein 1 [Gallus gallus]                 |
| isogroup07950 | MC4R [Anser anser]                                                                   |
| isogroup08261 | NA                                                                                   |
| isogroup09891 | R envelope protein [Pongo pygmaeus]                                                  |
| isogroup10152 | NA                                                                                   |
| isogroup11817 | NA                                                                                   |
| isogroup13009 | NA                                                                                   |
| isogroup14243 | PREDICTED: hypothetical protein [Gallus gallus]                                      |
| isogroup14777 | NA                                                                                   |
| isogroup15188 | PREDICTED: similar to panopsin [Gallus gallus]                                       |
| isogroup16513 | PREDICTED: phosphoglucomutase 1 isoform 1 [Taeniopygia guttata]                      |
| isogroup16847 | NA                                                                                   |
| isogroup17168 | PREDICTED: paraoxonase 2 isoform 1 [Taeniopygia guttata]                             |
| isogroup18351 | PREDICTED: glycerol-3-phosphate acyltransferase, mitochondrial [Taeniopygia guttata] |
| isogroup19711 | PREDICTED: cytospin A [Taeniopygia guttata]                                          |
| isogroup19740 | NA                                                                                   |
| isogroup19850 | NA                                                                                   |
| isogroup21172 | NA                                                                                   |

| <b>Isogroup</b> | <b>Annotation from nr Database</b>                    |
|-----------------|-------------------------------------------------------|
| isogroup21278   | PREDICTED: similar to gliomedin [Taeniopygia guttata] |
| contig90068     | NA                                                    |

**Supplementary Table 20. Genes expressed lower in T-treated than control males in hypothalamus.**

| Isogroup      | Annotation from nr Database                                                          |
|---------------|--------------------------------------------------------------------------------------|
| isogroup01140 | NA                                                                                   |
| isogroup01574 | PREDICTED: splicing factor, arginine/serine-rich 5 [Taeniopygia guttata]             |
| isogroup02347 | NA                                                                                   |
| isogroup02469 | putative protein kinase C inhibitor/ASWZ [Taeniopygia guttata]                       |
| isogroup03391 | NA                                                                                   |
| isogroup03738 | NA                                                                                   |
| isogroup04207 | NA                                                                                   |
| isogroup04627 | PREDICTED: regulating synaptic membrane exocytosis 2 isoform 2 [Taeniopygia guttata] |
| isogroup05307 | NA                                                                                   |
| isogroup05336 | PREDICTED: sulfatase modifying factor 2 isoform 1 [Taeniopygia guttata]              |
| isogroup05470 | NA                                                                                   |
| isogroup06195 | PREDICTED: protein phosphatase 4, regulatory subunit 1 [Taeniopygia guttata]         |
| isogroup07467 | PREDICTED: interferon regulatory factor 1 [Taeniopygia guttata]                      |
| isogroup09194 | NA                                                                                   |
| isogroup09735 | dicer 1, ribonuclease type III [Taeniopygia guttata]                                 |
| isogroup09959 | NA                                                                                   |
| isogroup10184 | NA                                                                                   |
| isogroup10647 | NA                                                                                   |
| isogroup11316 | PREDICTED: similar to LIM-homeobox 9 isoform 2 [Monodelphis domestica]               |
| isogroup12602 | NA                                                                                   |
| isogroup12750 | NA                                                                                   |
| isogroup12816 | NA                                                                                   |
| isogroup13274 | NA                                                                                   |
| isogroup13380 | NA                                                                                   |
| isogroup13641 | PREDICTED: calbindin 1, 28kDa [Taeniopygia guttata]                                  |
| isogroup14823 | PREDICTED: similar to chorea-acanthocytosis [Taeniopygia guttata]                    |
| isogroup14931 | PREDICTED: hypothetical protein [Gallus gallus]                                      |
| isogroup15235 | NA                                                                                   |
| isogroup15384 | methylcrotonoyl-Coenzyme A carboxylase 2 (beta) [Xenopus laevis]                     |
| isogroup16120 | PREDICTED: similar to natural killer tumor recognition protein [Gallus gallus]       |
| isogroup16428 | PREDICTED: fibroblast growth factor 14 isoform 1 [Taeniopygia guttata]               |
| isogroup16685 | NA                                                                                   |
| isogroup16695 | PREDICTED: ubiquitin specific peptidase like 1 [Taeniopygia guttata]                 |
| isogroup17199 | POL-like [Gallus gallus]                                                             |

| <b>Isogroup</b> | <b>Annotation from nr Database</b>                                                                  |
|-----------------|-----------------------------------------------------------------------------------------------------|
| isogroup18023   | NA                                                                                                  |
| isogroup18086   | NA                                                                                                  |
| isogroup18469   | growth hormone releasing hormone [Gallus gallus]                                                    |
| isogroup18599   | NA                                                                                                  |
| isogroup18689   | NA                                                                                                  |
| isogroup18880   | NA                                                                                                  |
| isogroup19057   | PREDICTED: similar to protein tyrosine phosphatase type 1, partial [Ornithorhynchus anatinus]       |
| isogroup19524   | NA                                                                                                  |
| isogroup20096   | NA                                                                                                  |
| isogroup20696   | PREDICTED: unc-13 homolog C (C. elegans) [Taeniopygia guttata]                                      |
| isogroup21210   | NA                                                                                                  |
| isogroup21289   | NA                                                                                                  |
| isogroup21497   | NA                                                                                                  |
| isogroup21580   | NA                                                                                                  |
| isogroup22021   | NA                                                                                                  |
| isogroup22327   | NA                                                                                                  |
| isogroup22534   | NA                                                                                                  |
| isogroup22581   | NA                                                                                                  |
| isogroup22638   | PREDICTED: transient receptor potential cation channel, subfamily M, member 8 [Taeniopygia guttata] |
| contig90097     | NA                                                                                                  |

**Supplementary Table 21. Genes expressed higher in T-treated than control males in both the medial amygdala and hypothalamus.**

| <b>Isogroup</b> | <b>Annotation from nr Database</b>                                |
|-----------------|-------------------------------------------------------------------|
| isogroup03488   | putative MGC89063 protein variant 2 [Taeniopygia guttata]         |
| isogroup06043   | PREDICTED: carboxypeptidase A2 (pancreatic) [Taeniopygia guttata] |
| isogroup07410   | PREDICTED: testin [Taeniopygia guttata]                           |
| isogroup09891   | R envelope protein [Pongo pygmaeus]                               |



**Supplementary Table 22. Genes expressed lower in T-treated than control males in both the medial amygdala and hypothalamus.**

| <b>Isogroup</b> | <b>Annotation from nr Database</b>                                                                  |
|-----------------|-----------------------------------------------------------------------------------------------------|
| isogroup05470   | NA                                                                                                  |
| isogroup10647   | NA                                                                                                  |
| isogroup20096   | NA                                                                                                  |
| isogroup22638   | PREDICTED: transient receptor potential cation channel, subfamily M, member 8 [Taeniopygia guttata] |
